# Supplementary material for: Genomics and cellulolytic, hemicellulolytic, and amylolytic potential of Iocasia fonsfrigidae strain SP3-1 for polysaccharide degradation
Source: PeerJ. 2022 Oct 19;10:e14211. doi: 10.7717/peerj.14211 (PMC9587714; doi:10.7717/peerj.14211)
Supplement: Supplemental Information 5 [file peerj-10-14211-s005.xlsx]

## Sheet: SP3-1 vs NS-1
Table S2: The complete comparison of all genes between strain SP3-1 and NS-1T with the percentage identity
SP3-1	Length	Function	NS-1	Length	Function	% identity	Aligment Length	Mismatch	Gapopen	SP3-1start	SP3-1end	NS-1start	NS-1end	Evalue	Bitscore
AZO93108.1	383	hypothetical protein D7D81_00010	QTL99347.1	385	COG3835 Sugar diacid utilization regulator	99.215	382	3	0	1	382	1	382	0	751
AZO93109.1	315	AEC family transporter	QTL99348.1	315	Transporter, auxin efflux carrier (AEC) family protein	99.683	315	1	0	1	315	1	315	0	610
AZO93110.1	490	lysine--tRNA ligase	QTL99349.1	490	Belongs to the class-II aminoacyl-tRNA synthetase family	99.796	490	1	0	1	490	1	490	0	1002
AZO93111.1	161	transcription elongation factor GreA	QTL99350.1	161	Necessary for efficient RNA polymerase transcription elongation past template-encoded arresting sites. The arresting sites in DNA have the property of trapping a certain fraction of elongating RNA polymerases that pass through, resulting in locked ternary complexes. Cleavage of the nascent transcript by cleavage factors such as GreA or GreB allows the resumption of elongation from the new 3'termi…	100	161	0	0	1	161	1	161	1.74e-114	318
AZO93112.1	363	shikimate dehydrogenase	QTL99351.1	363	Shikimate / quinate 5-dehydrogenase	100	363	0	0	1	363	1	363	0	741
AZO93113.1	307	quinate 5-dehydrogenase	QTL99352.1	307	oxidoreductase activity	99.674	307	1	0	1	307	1	307	0	618
AZO93114.1	173	transcriptional regulator	QTL99353.1	173	PFAM helix-turn-helix domain protein	100	173	0	0	1	173	1	173	5.42e-121	335
AZO93115.1	486	UDP-N-acetylmuramyl-tripeptide synthetase	QTL99354.1	486	Belongs to the MurCDEF family. MurE subfamily	99.383	486	3	0	1	486	1	486	0	989
AZO93116.1	323	tRNA dihydrouridine synthase DusB	QTL99355.1	323	Catalyzes the synthesis of 5,6-dihydrouridine (D), a modified base found in the D-loop of most tRNAs, via the reduction of the C5-C6 double bond in target uridines	97.833	323	7	0	1	323	1	323	0	650
AZO93117.1	257	type III pantothenate kinase	QTL99356.1	257	Catalyzes the phosphorylation of pantothenate (Pan), the first step in CoA biosynthesis	98.833	257	3	0	1	257	1	257	0	503
AZO93119.1	328	biotin--[acetyl-CoA-carboxylase] ligase	QTL99357.1	328	Acts both as a biotin-- acetyl-CoA-carboxylase ligase and a repressor	99.695	328	1	0	1	328	1	328	0	657
AZO93120.1	177	folate family ECF transporter S component	QTL99358.1	177	Pfam:DUF3816	99.435	177	1	0	1	177	1	177	4.84e-120	333
AZO93121.1	556	formate--tetrahydrofolate ligase	QTL99359.1	556	PFAM Formate--tetrahydrofolate ligase	99.281	556	4	0	1	556	1	556	0	1123
AZO93122.1	355	class I mannose-6-phosphate isomerase	QTL99360.1	355	TIGRFAM mannose-6-phosphate isomerase, class I	98.873	355	4	0	1	355	1	355	0	727
AZO93123.1	637	ATP-dependent metallopeptidase FtsH/Yme1/Tma family protein	QTL99361.1	637	Acts as a processive, ATP-dependent zinc metallopeptidase for both cytoplasmic and membrane proteins. Plays a role in the quality control of integral membrane proteins	99.843	637	1	0	1	637	1	637	0	1296
AZO93124.1	186	hypoxanthine phosphoribosyltransferase	QTL99362.1	186	Belongs to the purine pyrimidine phosphoribosyltransferase family	99.462	186	1	0	1	186	1	186	1.23e-135	374
AZO93125.1	480	tRNA lysidine(34) synthetase TilS	QTL99363.1	480	Ligates lysine onto the cytidine present at position 34 of the AUA codon-specific tRNA(Ile) that contains the anticodon CAU, in an ATP-dependent manner. Cytidine is converted to lysidine, thus changing the amino acid specificity of the tRNA from methionine to isoleucine	99.583	480	2	0	1	480	1	480	0	966
AZO93126.1	793	hypothetical protein D7D81_00105	QTL99364.1	793	PFAM Stage II sporulation protein E (SpoIIE)	99.369	793	5	0	1	793	1	793	0	1613
AZO93127.1	304	Ppx/GppA family phosphatase	QTL99365.1	304	PFAM Ppx GppA phosphatase	98.026	304	6	0	1	304	1	304	0	591
AZO93128.1	180	DUF501 domain-containing protein	QTL99366.1	180	Protein of unknown function (DUF501)	99.444	180	1	0	1	180	1	180	5.18e-136	374
AZO93129.1	97	septum formation initiator family protein	QTL99368.1	97	PFAM Septum formation initiator	97.938	97	2	0	1	97	1	97	4e-63	183
AZO93130.1	94	hypothetical protein D7D81_00140	QTL99369.1	94	hypothetical protein GM661_16110	100	94	0	0	1	94	1	94	1.44e-61	179
AZO93131.1	95	sporulation protein YabP	QTL99370.1	95	TIGRFAM sporulation protein YabP	98.947	95	1	0	1	95	1	95	2.8e-64	186
AZO93132.1	371	sn-glycerol-3-phosphate ABC transporter ATP-binding protein UgpC	QTL99371.1	371	ABC transporter	100	371	0	0	1	371	1	371	0	758
AZO93133.1	336	LacI family transcriptional regulator	QTL99372.1	336	Bacterial regulatory proteins, lacI family	99.107	336	3	0	1	336	1	336	0	671
AZO93134.1	309	ABC transporter permease	QTL99377.1	309	Belongs to the binding-protein-dependent transport system permease family	98.382	309	5	0	1	309	1	309	0	582
AZO93135.1	504	sugar ABC transporter ATP-binding protein	QTL99379.1	445	ATPases associated with a variety of cellular activities	99.551	445	2	0	1	445	1	445	0	889
AZO93136.1	310	ABC transporter permease	QTL99380.1	310	Branched-chain amino acid transport system / permease component	99.032	310	3	0	1	310	1	310	0	604
AZO93137.1	378	hypothetical protein D7D81_00175	QTL99381.1	378	substrate-binding domain-containing protein	99.735	378	1	0	1	378	1	378	0	772
AZO93138.1	686	glycosyl hydrolase	QTL99382.1	686	Fibronectin type III-like domain	96.064	686	27	0	1	686	1	686	0	1366
AZO93139.1	823	helix-turn-helix domain-containing protein	QTL99383.1	823	PFAM glycoside hydrolase family 39	98.177	823	15	0	1	823	1	823	0	1652
AZO93140.1	813	homocysteine methyltransferase	QTL99384.1	813	PFAM Pterin binding enzyme	98.893	813	9	0	1	813	1	813	0	1623
AZO93141.1	240	UPF0280 family protein	QTL99385.1	240	PFAM ApbE family	98.75	240	3	0	1	240	1	240	1.24e-178	486
AZO93142.1	137	4Fe-4S dicluster domain-containing protein	QTL99386.1	137	NIL domain	100	137	0	0	1	137	1	137	1.21e-99	278
AZO93143.1	394	hypothetical protein D7D81_00205	QTL99387.1	394	Homocysteine biosynthesis enzyme, sulfur-incorporation	98.731	394	5	0	1	394	1	394	0	804
AZO93144.1	218	beta-phosphoglucomutase	QTL99388.1	218	haloacid dehalogenase superfamily, subfamily IA, variant 3 with third motif having DD or ED	98.624	218	3	0	1	218	1	218	4.39e-159	435
AZO93145.1	425	ABC transporter ATP-binding protein	QTL99389.1	425	PFAM ABC transporter	99.294	425	3	0	1	425	1	425	0	862
AZO93146.1	336	iron ABC transporter permease	QTL99390.1	336	Belongs to the binding-protein-dependent transport system permease family. FecCD subfamily	99.405	336	2	0	1	336	1	336	0	648
AZO93147.1	398	PLP-dependent aminotransferase family protein	QTL99391.1	398	Alanine-glyoxylate amino-transferase	98.744	398	5	0	1	398	1	398	0	797
AZO93148.1	527	citramalate synthase	QTL99392.1	527	Belongs to the alpha-IPM synthase homocitrate synthase family	99.431	527	3	0	1	527	1	527	0	1071
AZO93149.1	353	3-isopropylmalate dehydrogenase	QTL99393.1	353	PFAM isocitrate isopropylmalate dehydrogenase	99.433	353	2	0	1	353	1	353	0	714
AZO93150.1	163	3-isopropylmalate dehydratase small subunit	QTL99394.1	163	Catalyzes the isomerization between 2-isopropylmalate and 3-isopropylmalate, via the formation of 2-isopropylmaleate	98.773	163	2	0	1	163	1	163	1.08e-118	329
AZO93151.1	421	3-isopropylmalate dehydratase large subunit	QTL99395.1	421	Catalyzes the isomerization between 2-isopropylmalate and 3-isopropylmalate, via the formation of 2-isopropylmaleate	99.287	421	3	0	1	421	1	421	0	866
AZO93152.1	505	2-isopropylmalate synthase	QTL99396.1	505	Catalyzes the condensation of the acetyl group of acetyl-CoA with 3-methyl-2-oxobutanoate (2-oxoisovalerate) to form 3-carboxy-3-hydroxy-4-methylpentanoate (2-isopropylmalate)	98.812	505	6	0	1	505	1	505	0	1016
AZO93153.1	329	ketol-acid reductoisomerase	QTL99397.1	329	Involved in the biosynthesis of branched-chain amino acids (BCAA). Catalyzes an alkyl-migration followed by a ketol- acid reduction of (S)-2-acetolactate (S2AL) to yield (R)-2,3- dihydroxy-isovalerate. In the isomerase reaction, S2AL is rearranged via a Mg-dependent methyl migration to produce 3- hydroxy-3-methyl-2-ketobutyrate (HMKB). In the reductase reaction, this 2-ketoacid undergoes a metal-…	100	329	0	0	1	329	1	329	0	674
AZO93154.1	162	acetolactate synthase small subunit	QTL99398.1	162	TIGRFAM acetolactate synthase, small subunit	100	162	0	0	1	162	1	162	6.96e-116	322
AZO93155.1	555	biosynthetic-type acetolactate synthase large subunit	QTL99399.1	555	TIGRFAM acetolactate synthase, large subunit, biosynthetic type	99.279	555	4	0	1	555	1	555	0	1124
AZO93156.1	367	histidinol-phosphate transaminase	QTL99400.1	367	Belongs to the class-II pyridoxal-phosphate-dependent aminotransferase family. Histidinol-phosphate aminotransferase subfamily	98.91	367	4	0	1	367	1	367	0	737
AZO93157.1	282	prephenate dehydratase	QTL99401.1	282	Prephenate dehydratase	98.582	282	4	0	1	282	1	282	0	560
AZO93158.1	209	DNA-binding response regulator	QTL99402.1	209	helix_turn_helix, Lux Regulon	99.043	209	2	0	1	209	1	209	8.59e-151	414
AZO93159.1	344	sensor histidine kinase	QTL99403.1	344	Histidine kinase	97.674	344	8	0	1	344	1	344	0	661
AZO93160.1	344	hypothetical protein D7D81_00295	QTL99404.1	344	hypothetical protein GM661_16285	99.419	344	2	0	1	344	1	344	0	676
AZO93161.1	264	outer membrane lipoprotein-sorting protein	QTL99405.1	264	Outer membrane lipoprotein-sorting protein	92.045	264	21	0	1	264	1	264	2.22e-176	483
AZO93162.1	396	ABC transporter permease	QTL99406.1	397	FtsX-like permease family	97.985	397	7	1	1	396	1	397	0	783
AZO93163.1	227	ABC transporter ATP-binding protein	QTL99407.1	227	ATPases associated with a variety of cellular activities	98.238	227	4	0	1	227	1	227	2.15e-162	444
AZO93164.1	253	tetratricopeptide repeat protein	QTL99408.1	253	Tetratricopeptide repeat	94.862	253	13	0	1	253	1	253	5.95e-175	478
AZO93165.1	539	alpha-glucan family phosphorylase	QTL99409.1	539	TIGRFAM alpha-glucan phosphorylases	97.403	539	14	0	1	539	1	539	0	1090
AZO93166.1	258	hypothetical protein D7D81_00325	QTL99410.1	189	hypothetical protein GM661_16315	98.942	189	2	0	1	189	1	189	6.93e-139	385
AZO93167.1	587	alpha-glycosidase	QTM00083.1	586	Alpha amylase, N-terminal ig-like domain	98.294	586	10	0	2	587	1	586	0	1180
AZO93169.1	195	YjgP/YjgQ family permease	QTL96901.1	363	Permease YjgP YjgQ family	34.078	179	113	2	8	181	2	180	7.91e-25	96.3
AZO93171.1	530	hypothetical protein D7D81_00350	QTL99411.1	905	hypothetical protein GM661_16325	35.115	131	71	3	1	121	1	127	4.43e-18	84.3
AZO93172.1	673	methyl-accepting chemotaxis protein	QTL99415.1	677	methyl-accepting chemotaxis protein	41.061	660	388	1	14	672	17	676	3.38e-167	491
AZO93173.1	280	sugar ABC transporter permease	QTL99418.1	280	Binding-protein-dependent transport system inner membrane component	67.857	280	90	0	1	280	1	280	2.36e-136	383
AZO93174.1	399	extracellular solute-binding protein	QTL99420.1	401	Bacterial extracellular solute-binding protein	65.195	385	134	0	15	399	17	401	0	541
AZO93176.1	334	LacI family transcriptional regulator	QTL99422.1	331	Bacterial regulatory proteins, lacI family	95.808	334	11	1	1	334	1	331	0	651
AZO93177.1	284	carbohydrate ABC transporter permease	QTL99423.1	284	Psort location CytoplasmicMembrane, score 10.00	99.296	284	2	0	1	284	1	284	0	557
AZO93178.1	289	sugar ABC transporter permease	QTL99424.1	289	Abc transporter	98.962	289	3	0	1	289	1	289	0	576
AZO93179.1	430	carbohydrate ABC transporter substrate-binding protein	QTL99425.1	430	ABC transporter, substratebinding protein	100	430	0	0	1	430	1	430	0	871
AZO93180.1	787	glycoside hydrolase family 65 protein	QTL99426.1	787	hydrolase family 65 central catalytic	99.111	787	7	0	1	787	1	787	0	1624
AZO93181.1	312	SpoIID/LytB domain-containing protein	QTL99428.1	312	Stage II sporulation protein	99.038	312	3	0	1	312	1	312	0	638
AZO93182.1	389	D-alanyl-D-alanine carboxypeptidase	QTL99429.1	389	Belongs to the peptidase S11 family	98.972	389	4	0	1	389	1	389	0	788
AZO93183.1	272	nucleoside triphosphate pyrophosphohydrolase	QTL99430.1	272	TIGRFAM MazG family protein	99.265	272	2	0	1	272	1	272	0	540
AZO93184.1	542	polysaccharide biosynthesis protein	QTL99431.1	542	TIGRFAM stage V sporulation protein B	99.262	542	4	0	1	542	1	542	0	1048
AZO93185.1	185	aminoacyl-tRNA hydrolase	QTL99433.1	185	The natural substrate for this enzyme may be peptidyl- tRNAs which drop off the ribosome during protein synthesis	100	185	0	0	1	185	1	185	2.6e-135	372
AZO93186.1	216	50S ribosomal protein L25	QTL99434.1	216	This is one of the proteins that binds to the 5S RNA in the ribosome where it forms part of the central protuberance	99.537	216	1	0	1	216	1	216	9.64e-154	422
AZO93187.1	314	ribose-phosphate pyrophosphokinase	QTL99435.1	314	Involved in the biosynthesis of the central metabolite phospho-alpha-D-ribosyl-1-pyrophosphate (PRPP) via the transfer of pyrophosphoryl group from ATP to 1-hydroxyl of ribose-5-phosphate (Rib-5-P)	100	314	0	0	1	314	1	314	0	636
AZO93188.1	456	bifunctional UDP-N-acetylglucosamine diphosphorylase/glucosamine-1-phosphate N-acetyltransferase GlmU	QTL99436.1	456	Catalyzes the last two sequential reactions in the de novo biosynthetic pathway for UDP-N-acetylglucosamine (UDP- GlcNAc). The C-terminal domain catalyzes the transfer of acetyl group from acetyl coenzyme A to glucosamine-1-phosphate (GlcN-1-P) to produce N-acetylglucosamine-1-phosphate (GlcNAc-1-P), which is converted into UDP-GlcNAc by the transfer of uridine 5- monophosphate (from uridine 5-tr…	98.684	456	6	0	1	456	1	456	0	908
AZO93189.1	283	hypothetical protein D7D81_00535	QTL99437.1	283	hypothetical protein GM661_16540	100	283	0	0	1	283	1	283	0	570
AZO93190.1	85	septation regulator SpoVG	QTL99438.1	85	Belongs to the SpoVG family	97.647	85	2	0	1	85	1	85	8.24e-60	174
AZO93191.1	327	AIR synthase	QTL99439.1	327	PFAM AIR synthase related protein	98.471	327	5	0	1	327	1	327	0	639
AZO93192.1	174	ECF transporter S component	QTL99440.1	174	ECF-type riboflavin transporter, S component	99.425	174	1	0	1	174	1	174	9.08e-126	347
AZO93193.1	443	type I glutamate--ammonia ligase	QTM00085.1	443	PFAM glutamine synthetase catalytic region	100	443	0	0	1	443	1	443	0	917
AZO93194.1	118	MerR family transcriptional regulator	QTL99441.1	118	PFAM MerR family regulatory protein	100	118	0	0	1	118	1	118	1.99e-83	236
AZO93195.1	359	hypothetical protein D7D81_00565	QTL99442.1	359	Associated with various cellular activities	98.886	359	4	0	1	359	1	359	0	729
AZO93196.1	252	hypothetical protein D7D81_00570	QTL99443.1	252	MobA-like NTP transferase domain	99.206	252	2	0	1	252	1	252	0	499
AZO93197.1	288	4-(cytidine 5'-diphospho)-2-C-methyl-D-erythritol kinase	QTL99444.1	288	Catalyzes the phosphorylation of the position 2 hydroxy group of 4-diphosphocytidyl-2C-methyl-D-erythritol	99.306	288	2	0	1	288	1	288	0	588
AZO93198.1	426	iron-containing alcohol dehydrogenase	QTL99446.1	426	hydroxyacid-oxoacid transhydrogenase activity	96.948	426	13	0	1	426	1	426	0	835
AZO93199.1	304	endonuclease	QTL99455.1	264	PFAM Endonuclease Exonuclease phosphatase	99.242	264	2	0	41	304	1	264	0	527
AZO93200.1	180	LysM peptidoglycan-binding domain-containing protein	QTL99456.1	180	ErfK YbiS YcfS YnhG family protein	98.889	180	2	0	1	180	1	180	1.61e-132	365
AZO93201.1	357	calcium/proton exchanger	QTL99457.1	357	calcium proton exchanger	96.639	357	12	0	1	357	1	357	0	672
AZO93202.1	212	hypothetical protein D7D81_00600	QTL99458.1	212	hypothetical protein GM661_16650	97.17	212	6	0	1	212	1	212	7.37e-157	429
AZO93203.1	318	glycosyltransferase family 2 protein	QTL99459.1	318	Glycosyl transferase, family 2	98.113	318	6	0	1	318	1	318	0	644
AZO93204.1	266	glycosyltransferase family 2 protein	QTL99460.1	266	COG0463 Glycosyltransferases involved in cell wall biogenesis	98.872	266	3	0	1	266	1	266	0	540
AZO93205.1	239	hypothetical protein D7D81_00615	QTL99461.1	239	hypothetical protein GM661_16665	98.326	239	4	0	1	239	1	239	8.4e-177	482
AZO93206.1	505	DUF3794 domain-containing protein	QTL99462.1	505	Domain of unknown function (DUF3794)	98.812	505	6	0	1	505	1	505	0	972
AZO93207.1	543	DUF3794 domain-containing protein	QTL99463.1	543	Domain of unknown function (DUF3794)	97.606	543	13	0	1	543	1	543	0	1050
AZO93208.1	136	hypothetical protein D7D81_00630	QTL99464.1	136	hypothetical protein GM661_16680	97.794	136	3	0	1	136	1	136	7.35e-98	274
AZO93209.1	601	DUF3794 domain-containing protein	QTL99465.1	601	Domain of unknown function (DUF3794)	99.834	601	1	0	1	601	1	601	0	1195
AZO93210.1	639	DUF3794 domain-containing protein	QTL99466.1	639	DUF3794 domain-containing protein	99.061	639	6	0	1	639	1	639	0	1248
AZO93211.1	244	hypothetical protein D7D81_00645	QTL99467.1	244	PFAM Cysteine-rich secretory protein family	99.59	244	1	0	1	244	1	244	0	495
AZO93212.1	313	hypothetical protein D7D81_00650	QTL99468.1	313	hypothetical protein GM661_16700	97.444	313	8	0	1	313	1	313	0	605
AZO93213.1	143	PspC domain-containing protein	QTL99469.1	143	PFAM PspC domain	100	143	0	0	1	143	1	143	2.32e-103	288
AZO93214.1	215	phosphate transport system regulatory protein PhoU	QTL99470.1	215	Plays a role in the regulation of phosphate uptake	99.535	215	1	0	1	215	1	215	1.94e-156	428
AZO93215.1	252	phosphate ABC transporter ATP-binding protein	QTL99471.1	252	Part of the ABC transporter complex PstSACB involved in phosphate import. Responsible for energy coupling to the transport system	98.81	252	3	0	1	252	1	252	0	514
AZO93216.1	250	EAL domain-containing protein	QTL99472.1	257	PFAM EAL domain	99.6	250	1	0	1	250	8	257	0	507
AZO93217.1	387	YibE/F family protein	QTL99473.1	387	PFAM YibE F family protein	96.124	387	15	0	1	387	1	387	0	679
AZO93218.1	471	alkaline phosphatase	QTL99474.1	471	Belongs to the alkaline phosphatase family	90.446	471	45	0	1	471	1	471	0	867
AZO93219.1	690	methyl-accepting chemotaxis protein	QTL99475.1	690	SMART chemotaxis sensory transducer, histidine kinase HAMP region domain protein	98.261	690	12	0	1	690	1	690	0	1362
AZO93220.1	289	phosphate ABC transporter permease PstA	QTL99476.1	289	PFAM Binding-protein-dependent transport system inner membrane component	99.654	289	1	0	1	289	1	289	0	563
AZO93221.1	295	phosphate ABC transporter permease subunit PstC	QTL99477.1	295	probably responsible for the translocation of the substrate across the membrane	98.644	295	4	0	1	295	1	295	0	573
AZO93222.1	269	phosphate ABC transporter substrate-binding protein	QTL99478.1	269	TIGRFAM phosphate binding protein	96.654	269	9	0	1	269	1	269	0	528
AZO93223.1	788	DUF4968 domain-containing protein	QTL99167.1	784	Belongs to the glycosyl hydrolase 31 family	56.616	786	335	6	1	784	1	782	0	949
AZO93224.1	292	sugar ABC transporter permease	QTL99210.1	294	PFAM binding-protein-dependent transport systems inner membrane component	45.255	274	148	1	19	290	17	290	5.33e-79	238
AZO93225.1	429	extracellular solute-binding protein	QTL99211.1	423	Bacterial extracellular solute-binding protein	26.111	360	218	15	1	334	1	338	5.89e-18	82
AZO93226.1	334	LacI family transcriptional regulator	QTL97234.1	337	Bacterial regulatory proteins, lacI family	33.828	337	214	6	4	334	3	336	1.53e-54	178
AZO93227.1	593	HAMP domain-containing protein	QTL99479.1	593	Histidine kinase-, DNA gyrase B-, and HSP90-like ATPase	98.988	593	6	0	1	593	1	593	0	1166
AZO93228.1	228	DNA-binding response regulator	QTL99480.1	228	PFAM response regulator receiver	100	228	0	0	1	228	1	228	8.25e-164	448
AZO93229.1	552	Na/Pi cotransporter family protein	QTL99481.1	552	TIGRFAM Na Pi-cotransporter	99.819	552	1	0	1	552	1	552	0	1111
AZO93230.1	599	glycosyltransferase	QTL99482.1	599	glycosyltransferase	97.83	599	13	0	1	599	1	599	0	1186
AZO93231.1	327	glycosyltransferase	QTL99483.1	328	PFAM Glycosyl transferases group 1	96.33	327	12	0	1	327	2	328	0	652
AZO93232.1	240	glycosyltransferase	QTL99484.1	240	glycosyltransferase	98.333	240	4	0	1	240	1	240	0	492
AZO93233.1	1010	glycosyltransferase	QTL99485.1	1010	Glycosyltransferase like family 2	98.911	1010	11	0	1	1010	1	1010	0	2028
AZO93234.1	357	glucose-1-phosphate thymidylyltransferase	QTL99486.1	357	Nucleotidyl transferase	98.319	357	6	0	1	357	1	357	0	706
AZO93235.1	313	hypothetical protein D7D81_00770	QTL99487.1	313	family 18	99.042	313	3	0	1	313	1	313	0	624
AZO93236.1	334	hypothetical protein D7D81_00775	QTL99488.1	334	Trypsin-like serine proteases, typically periplasmic, contain C-terminal PDZ domain	99.401	334	2	0	1	334	1	334	0	676
AZO93237.1	88	protein veg	QTL99489.1	88	protein conserved in bacteria	100	88	0	0	1	88	1	88	9.76e-61	176
AZO93238.1	266	sporulation peptidase YabG	QTL99490.1	266	sporulation peptidase YabG	99.248	266	2	0	1	266	1	266	0	535
AZO93239.1	159	hypothetical protein D7D81_00790	QTL99491.1	159	Ribonuclease H-like	99.371	159	1	0	1	159	1	159	8.23e-116	321
AZO93240.1	294	16S rRNA (adenine(1518)-N(6)/adenine(1519)-N(6))-dimethyltransferase RsmA	QTL99492.1	294	Specifically dimethylates two adjacent adenosines (A1518 and A1519) in the loop of a conserved hairpin near the 3'-end of 16S rRNA in the 30S particle. May play a critical role in biogenesis of 30S subunits	98.299	294	5	0	1	294	1	294	0	580
AZO93241.1	82	hypothetical protein D7D81_00800	QTL99493.1	82	hypothetical protein GM661_16825	100	82	0	0	1	82	1	82	2.59e-56	165
AZO93242.1	154	hypothetical protein D7D81_00805	QTL99494.1	154	hypothetical protein GM661_16830	96.104	154	6	0	1	154	1	154	1.49e-100	282
AZO93243.1	402	MFS transporter	QTL99495.1	402	PFAM Major Facilitator Superfamily	99.254	402	3	0	1	402	1	402	0	781
AZO93244.1	152	DUF441 family protein	QTL99497.1	152	Protein of unknown function (DUF441)	100	152	0	0	1	152	1	152	3.52e-101	283
AZO93245.1	283	phosphosulfolactate synthase	QTL99498.1	283	PFAM (2R)-phospho-3-sulfolactate synthase ComA	98.94	283	3	0	1	283	1	283	0	558
AZO93246.1	214	fructose-6-phosphate aldolase	QTL99499.1	214	Transaldolase is important for the balance of metabolites in the pentose-phosphate pathway	100	214	0	0	1	214	1	214	1.74e-156	428
AZO93247.1	414	glycoside hydrolase family 18	QTL99500.1	414	family 18	99.517	414	2	0	1	414	1	414	0	839
AZO93248.1	211	DNA-binding response regulator	QTL99501.1	211	helix_turn_helix, Lux Regulon	100	211	0	0	1	211	1	211	6.59e-152	417
AZO93249.1	373	histidine kinase	QTL99502.1	373	Histidine kinase-, DNA gyrase B-, and HSP90-like ATPase	99.732	373	1	0	1	373	1	373	0	737
AZO93250.1	246	gamma-glutamyl-gamma-aminobutyrate hydrolase family protein	QTL99503.1	247	PFAM Peptidase C26	98.785	247	2	1	1	246	1	247	0	500
AZO93251.1	402	hypothetical protein D7D81_00850	QTL99504.1	402	hypothetical protein GM661_16880	97.264	402	11	0	1	402	1	402	0	803
AZO93252.1	238	hypothetical protein D7D81_00855	QTL99505.1	238	peptidoglycan binding domain	98.319	238	4	0	1	238	1	238	3.24e-175	478
AZO93253.1	75	DUF2905 domain-containing protein	QTL99506.1	75	DUF2905 family protein	98.667	75	1	0	1	75	1	75	3.29e-47	141
AZO93254.1	106	YbaB/EbfC family DNA-binding protein	QTL99508.1	106	YbaB/EbfC DNA-binding family	99.057	106	1	0	1	106	1	106	8.47e-73	208
AZO93255.1	116	hypothetical protein D7D81_00875	QTL99509.1	116	hypothetical protein GM661_16905	96.552	116	4	0	1	116	1	116	2.63e-79	225
AZO93256.1	347	HD-GYP domain-containing protein	QTL99510.1	347	HD domain	98.847	347	4	0	1	347	1	347	0	699
AZO93257.1	395	LysM peptidoglycan-binding domain-containing protein	QTL99511.1	395	PFAM LysM domain	98.987	395	4	0	1	395	1	395	0	786
AZO93258.1	522	polysaccharide biosynthesis protein	QTL99512.1	522	TIGRFAM stage V sporulation protein B	99.425	522	3	0	1	522	1	522	0	1028
AZO93259.1	381	cysteine desulfurase	QTL99513.1	381	PFAM Aminotransferase	97.638	381	9	0	1	381	1	381	0	756
AZO93261.1	301	UDP-N-acetylmuramate dehydrogenase	QTL99514.1	302	Cell wall formation	98.339	301	5	0	1	301	2	302	0	597
AZO93262.1	79	GIY-YIG nuclease family protein	QTL99515.1	79	GIY-YIG catalytic domain	98.734	79	1	0	1	79	1	79	8.05e-54	158
AZO93263.1	158	rubrerythrin	QTL99516.1	158	Rubrerythrin	99.367	158	1	0	1	158	1	158	1.27e-111	310
AZO93264.1	147	FxsA family protein	QTL99517.1	147	PFAM FxsA cytoplasmic membrane protein	97.959	147	3	0	1	147	1	147	2.42e-100	281
AZO93266.1	93	hypothetical protein D7D81_00930	QTL99518.1	93	hypothetical protein GM661_16955	98.925	93	1	0	1	93	1	93	2.29e-58	171
AZO93267.1	651	methyl-accepting chemotaxis protein	QTL99525.1	651	Methyl-accepting chemotaxis-like domains (chemotaxis sensory transducer).	72.504	651	179	0	1	651	1	651	0	947
AZO93268.1	166	chemotaxis protein CheD	QTL98428.1	157	Probably deamidates glutamine residues to glutamate on methyl-accepting chemotaxis receptors (MCPs), playing an important role in chemotaxis	31.915	141	82	3	14	147	5	138	2.23e-15	66.2
AZO93269.1	267	methyltransferase domain-containing protein	QTL99527.1	268	Methyltransferase, chemotaxis proteins	67.669	266	85	1	1	265	1	266	6.54e-132	371
AZO93270.1	190	chemotaxis protein CheW	QTL99528.1	193	Two component signalling adaptor domain	80	175	35	0	1	175	1	175	2.02e-99	282
AZO93271.1	649	chemotaxis protein CheA	QTM00087.1	653	Signal transducing histidine kinase, homodimeric domain	63.291	632	222	2	28	649	22	653	0	789
AZO93272.1	126	response regulator	QTL99529.1	126	cheY-homologous receiver domain	72.222	126	35	0	1	126	1	126	9.06e-65	189
AZO93273.1	90	hypothetical protein D7D81_00965	QTL99530.1	95	STAS domain-containing protein	59.77	87	35	0	3	89	8	94	5.54e-32	104
AZO93274.1	599	hypothetical protein D7D81_00970	QTL99531.1	612	hypothetical protein GM661_17030	47.557	614	305	5	1	599	1	612	1.12e-174	506
AZO93275.1	190	DUF2294 family protein	QTL99532.1	190	DUF2294 family protein	65.263	190	66	0	1	190	1	190	4.19e-86	248
AZO93276.1	742	vitamin B12-dependent ribonucleotide reductase	QTL99533.1	1157	Catalyzes the reduction of ribonucleotides to deoxyribonucleotides. May function to provide a pool of deoxyribonucleotide precursors for DNA repair during oxygen limitation and or for immediate growth after restoration of oxygen	96.383	470	17	0	273	742	688	1157	0	956
AZO93276.1	742	vitamin B12-dependent ribonucleotide reductase	QTL99533.1	1157	Catalyzes the reduction of ribonucleotides to deoxyribonucleotides. May function to provide a pool of deoxyribonucleotide precursors for DNA repair during oxygen limitation and or for immediate growth after restoration of oxygen	98.535	273	4	0	1	273	1	273	0	561
AZO93277.1	224	MgtC/SapB family protein	QTL99534.1	145	PFAM MgtC SapB transporter	49.057	106	53	1	13	118	7	111	8.59e-30	105
AZO93278.1	546	iron ABC transporter permease	QTL99535.1	546	ABC-type Fe3 transport system permease component	99.634	546	2	0	1	546	1	546	0	1069
AZO93279.1	330	ABC transporter substrate-binding protein	QTM00089.1	330	Bacterial extracellular solute-binding protein	99.697	330	1	0	1	330	1	330	0	676
AZO93280.1	124	DUF2294 domain-containing protein	QTL99536.1	124	Uncharacterized conserved protein (DUF2294)	100	124	0	0	1	124	1	124	2.18e-85	241
AZO93281.1	128	DUF2294 family protein	QTL99537.1	128	DUF2294 family protein	99.219	128	1	0	1	128	1	128	1.26e-90	255
AZO93282.1	341	ABC transporter substrate-binding protein	QTL99538.1	341	Bacterial extracellular solute-binding protein	99.413	341	2	0	1	341	1	341	0	690
AZO93283.1	457	DUF4388 domain-containing protein	QTL99539.1	457	protein histidine kinase activity	99.344	457	3	0	1	457	1	457	0	912
AZO93284.1	260	LuxR family transcriptional regulator	QTL99540.1	260	PFAM regulatory protein LuxR	96.538	260	9	0	1	260	1	260	0	518
AZO93285.1	153	hypothetical protein D7D81_01030	QTL99541.1	202	hypothetical protein GM661_17090	94.118	153	9	0	1	153	1	153	1.54e-94	269
AZO93286.1	212	dihydroxyacetone kinase subunit L	QTL99542.1	212	TIGRFAM dihydroxyacetone kinase	96.226	212	8	0	1	212	1	212	2.78e-150	412
AZO93287.1	334	dihydroxyacetone kinase subunit DhaK	QTL99543.1	334	Dak1 domain	96.407	334	12	0	1	334	1	334	0	652
AZO93288.1	257	D-threitol dehydrogenase	QTL99706.1	260	PFAM Short-chain dehydrogenase reductase SDR	40.551	254	143	4	10	256	7	259	2.78e-55	175
AZO93289.1	324	ABC transporter permease	QTL97732.1	319	Branched-chain amino acid transport system / permease component	48.344	302	148	2	25	324	23	318	8.91e-86	258
AZO93290.1	494	sugar ABC transporter ATP-binding protein	QTL99885.1	488	Part of the ABC transporter complex RbsABC involved in ribose import. Responsible for energy coupling to the transport system	49.794	486	244	0	9	494	1	486	3.31e-170	486
AZO93291.1	160	ribose 5-phosphate isomerase B	QTL99550.1	161	PFAM Ribose galactose isomerase	97.5	160	4	0	1	160	1	160	1.76e-114	318
AZO93292.1	256	DeoR/GlpR transcriptional regulator	QTL99551.1	256	DeoR C terminal sensor domain	100	256	0	0	1	256	1	256	0	511
AZO93293.1	410	6-phosphofructokinase	QTL99552.1	410	Catalyzes the phosphorylation of D-fructose 6-phosphate, the first committing step of glycolysis. Uses inorganic phosphate (PPi) as phosphoryl donor instead of ATP like common ATP-dependent phosphofructokinases (ATP-PFKs), which renders the reaction reversible, and can thus function both in glycolysis and gluconeogenesis. Consistently, PPi-PFK can replace the enzymes of both the forward (ATP-PFK)…	99.024	410	4	0	1	410	1	410	0	832
AZO93294.1	580	phosphoenolpyruvate--protein phosphotransferase	QTL99553.1	580	General (non sugar-specific) component of the phosphoenolpyruvate-dependent sugar phosphotransferase system (sugar PTS). This major carbohydrate active-transport system catalyzes the phosphorylation of incoming sugar substrates concomitantly with their translocation across the cell membrane. Enzyme I transfers the phosphoryl group from phosphoenolpyruvate (PEP) to the phosphoryl carrier protein (…	98.448	580	9	0	1	580	1	580	0	1168
AZO93295.1	88	HPr family phosphocarrier protein	QTL99554.1	91	TIGRFAM Phosphotransferase System HPr (HPr) Family	97.727	88	2	0	1	88	4	91	8.07e-60	174
AZO93296.1	96	DUF1232 domain-containing protein	QTL99555.1	96	Protein of unknown function (DUF1232)	97.917	96	2	0	1	96	1	96	3.63e-64	186
AZO93297.1	597	L-fucose isomerase	QTL99556.1	596	Converts the aldose L-fucose into the corresponding ketose L-fuculose	97.819	596	13	0	2	597	1	596	0	1215
AZO93298.1	59	hypothetical protein D7D81_01105	QTL99557.1	50	hypothetical protein GM661_17175	98	50	1	0	10	59	1	50	4.28e-31	99.4
AZO93299.1	336	LacI family transcriptional regulator	QTL99558.1	336	Transcriptional regulator, LacI family	99.405	336	2	0	1	336	1	336	0	674
AZO93300.1	319	hydroxyacid dehydrogenase	QTL99559.1	319	D-isomer specific 2-hydroxyacid dehydrogenase, catalytic domain	99.373	319	2	0	1	319	1	319	0	629
AZO93301.1	426	TRAP transporter large permease	QTL99560.1	426	mannitol 2-dehydrogenase activity	100	426	0	0	1	426	1	426	0	819
AZO93302.1	177	TRAP transporter small permease	QTL99561.1	177	Tripartite ATP-independent periplasmic transporters, DctQ component	100	177	0	0	1	177	1	177	8.96e-126	348
AZO93303.1	354	DctP family TRAP transporter solute-binding subunit	QTL99562.1	354	carbohydrate transport	99.435	354	2	0	1	354	1	354	0	725
AZO93304.1	296	4-hydroxy-tetrahydrodipicolinate synthase	QTL99563.1	296	Catalyzes the condensation of (S)-aspartate-beta- semialdehyde (S)-ASA and pyruvate to 4-hydroxy- tetrahydrodipicolinate (HTPA)	97.635	296	7	0	1	296	1	296	0	589
AZO93305.1	271	IclR family transcriptional regulator	QTL99564.1	271	Transcriptional regulator IclR	98.524	271	4	0	1	271	1	271	0	541
AZO93306.1	241	3-deoxy-manno-octulosonate cytidylyltransferase	QTL99565.1	241	Activates KDO (a required 8-carbon sugar) for incorporation into bacterial lipopolysaccharide in Gram-negative bacteria	99.585	241	1	0	1	241	1	241	2.32e-178	486
AZO93307.1	149	DUF386 domain-containing protein	QTL99566.1	148	Domain of unknown function (DUF386)	100	148	0	0	1	148	1	148	2.15e-103	289
AZO93308.1	661	methyl-accepting chemotaxis protein	QTL99567.1	661	methyl-accepting chemotaxis protein	99.092	661	6	0	1	661	1	661	0	1303
AZO93309.1	208	dihydroxyacetone kinase subunit L	QTL99568.1	208	dihydroxyacetone kinase L subunit	99.038	208	2	0	1	208	1	208	2.39e-148	407
AZO93310.1	336	dihydroxyacetone kinase subunit DhaK	QTL99569.1	336	Dak1 domain	99.107	336	3	0	1	336	1	336	0	668
AZO93311.1	86	HPr family phosphocarrier protein	QTL99570.1	86	HPr family	100	86	0	0	1	86	1	86	4.77e-61	177
AZO93312.1	134	PTS-dependent dihydroxyacetone kinase phosphotransferase subunit DhaM	QTL99571.1	134	dihydroxyacetone kinase, phosphotransfer subunit	100	134	0	0	1	134	1	134	3.85e-90	254
AZO93313.1	212	dihydroxyacetone kinase subunit L	QTL99572.1	212	dihydroxyacetone kinase, phosphoprotein-dependent, L subunit	100	212	0	0	1	212	1	212	3.91e-156	427
AZO93314.1	336	dihydroxyacetone kinase subunit DhaK	QTL99573.1	336	Dihydroxyacetone kinase DhaK, subunit	99.107	336	3	0	1	336	1	336	0	672
AZO93315.1	448	serine dehydratase subunit alpha family protein	QTL99574.1	448	Belongs to the UPF0597 family	99.777	448	1	0	1	448	1	448	0	904
AZO93316.1	162	hypothetical protein D7D81_01195	QTL99575.1	162	L-2-amino-thiazoline-4-carboxylic acid hydrolase	99.383	162	1	0	1	162	1	162	5.57e-118	327
AZO93317.1	237	ABC transporter ATP-binding protein	QTL99576.1	237	ABC transporter	100	237	0	0	1	237	1	237	2.4e-177	483
AZO93318.1	256	ABC transporter ATP-binding protein	QTL99577.1	256	ABC transporter, ATP-binding protein	99.609	256	1	0	1	256	1	256	0	526
AZO93319.1	334	branched-chain amino acid ABC transporter permease	QTL99578.1	334	Belongs to the binding-protein-dependent transport system permease family	97.904	334	7	0	1	334	1	334	0	649
AZO93320.1	290	branched-chain amino acid ABC transporter permease	QTL99579.1	291	Belongs to the binding-protein-dependent transport system permease family	98.621	290	4	0	1	290	1	290	0	554
AZO93321.1	374	hypothetical protein D7D81_01220	QTL99580.1	374	Receptor family ligand binding region	99.733	374	1	0	1	374	1	374	0	768
AZO93322.1	208	cupin domain-containing protein	QTL99581.1	188	Cupin domain	98.936	188	2	0	21	208	1	188	8e-138	380
AZO93323.1	340	spore photoproduct lyase	QTL99582.1	340	TIGRFAM spore photoproduct lyase	93.824	340	21	0	1	340	1	340	0	645
AZO93324.1	287	DegV family protein	QTL99583.1	287	DegV family	98.606	287	4	0	1	287	1	287	0	577
AZO93325.1	386	sulfate adenylyltransferase	QTL99584.1	386	PUA-like domain	98.446	386	6	0	1	386	1	386	0	784
AZO93327.1	427	TRAP transporter large permease	QTL99451.1	423	mannitol 2-dehydrogenase activity	44.928	414	227	1	11	424	9	421	4.47e-127	371
AZO93328.1	160	TRAP transporter small permease	QTL99561.1	177	Tripartite ATP-independent periplasmic transporters, DctQ component	29.71	138	92	2	3	136	17	153	5.75e-11	55.1
AZO93329.1	329	TRAP transporter substrate-binding protein	QTL97395.1	327	carbohydrate transport	35.241	332	204	6	1	328	1	325	7.52e-62	197
AZO93330.1	267	3-keto-5-aminohexanoate cleavage protein	QTL99102.1	271	beta-keto acid cleavage enzyme	34.615	234	150	3	32	264	39	270	1.62e-42	143
AZO93331.1	238	FadR family transcriptional regulator	QTL97303.1	225	FCD	27.65	217	148	4	16	231	9	217	5.16e-24	92.8
AZO93333.1	278	PHP domain-containing protein	QTL99590.1	278	PFAM PHP domain	97.482	278	7	0	1	278	1	278	0	550
AZO93335.1	138	YjbQ family protein	QTL99591.1	138	Uncharacterised protein family UPF0047	97.826	138	3	0	1	138	1	138	9.64e-102	284
AZO93336.1	363	mannonate dehydratase	QTL99593.1	363	Catalyzes the dehydration of D-mannonate	98.623	363	5	0	1	363	1	363	0	741
AZO93337.1	233	GntR family transcriptional regulator	QTL99594.1	231	PFAM Bacterial regulatory proteins, gntR family	98.684	228	3	0	1	228	1	228	2.88e-167	457
AZO93338.1	336	zinc-binding alcohol dehydrogenase family protein	QTL99595.1	336	Alcohol dehydrogenase GroES-like domain	99.405	336	2	0	1	336	1	336	0	679
AZO93339.1	337	3-dehydro-L-gulonate 2-dehydrogenase	QTL99596.1	337	Malate/L-lactate dehydrogenase	99.11	337	3	0	1	337	1	337	0	688
AZO93340.1	425	TRAP transporter large permease	QTL99597.1	425	Tripartite ATP-independent periplasmic transporter, DctM component	99.765	425	1	0	1	425	1	425	0	825
AZO93341.1	167	TRAP transporter small permease	QTL99598.1	167	Tripartite ATP-independent periplasmic transporters, DctQ component	99.401	167	1	0	1	167	1	167	1.22e-122	339
AZO93342.1	330	C4-dicarboxylate ABC transporter	QTL99599.1	328	Bacterial extracellular solute-binding protein, family 7	98.485	330	3	1	1	330	1	328	0	652
AZO93343.1	417	nickel-dependent lactate racemase	QTL99600.1	417	Domain of unknown function (DUF2088)	99.52	417	2	0	1	417	1	417	0	851
AZO93344.1	119	response regulator	QTL99601.1	119	PFAM Response regulator receiver domain	96.639	119	4	0	1	119	1	119	8.3e-82	232
AZO93345.1	362	LysM peptidoglycan-binding domain-containing protein	QTL99602.1	362	Peptidase, M23	98.066	362	7	0	1	362	1	362	0	721
AZO93347.1	1111	DUF5107 domain-containing protein	QTL99603.1	1114	Tetratricopeptide repeat protein	96.85	1111	35	0	1	1111	1	1111	0	2225
AZO93349.1	344	AraC family transcriptional regulator	QTL99604.1	317	AraC family transcriptional regulator	95.584	317	14	0	28	344	1	317	0	599
AZO93350.1	319	L-arabinose ABC transporter permease AraH	QTL99605.1	319	Belongs to the binding-protein-dependent transport system permease family	99.687	319	1	0	1	319	1	319	0	607
AZO93351.1	496	ATP-binding cassette domain-containing protein	QTM00092.1	497	import. Responsible for energy coupling to the transport system	97.581	496	12	0	1	496	2	497	0	985
AZO93352.1	322	arabinose ABC transporter substrate-binding protein	QTL99606.1	322	PFAM periplasmic binding protein	98.758	322	4	0	1	322	1	322	0	654
AZO93353.1	195	response regulator	QTL99607.1	195	ANTAR	98.974	195	2	0	1	195	1	195	2.13e-138	381
AZO93354.1	611	ATP-binding cassette domain-containing protein	QTL99608.1	611	HWE histidine kinase	98.036	611	12	0	1	611	1	611	0	1219
AZO93355.1	334	LacI family transcriptional regulator	QTL99609.1	334	Bacterial regulatory proteins, lacI family	98.802	334	4	0	1	334	1	334	0	664
AZO93356.1	472	FAD-binding protein	QTL99610.1	472	FAD linked oxidase domain protein	99.153	472	4	0	1	472	1	472	0	943
AZO93357.1	334	electron transfer flavoprotein subunit alpha/FixB family protein	QTL99611.1	334	Electron transfer flavoprotein	99.401	334	2	0	1	334	1	334	0	676
AZO93358.1	265	electron transfer flavoprotein subunit beta/FixA family protein	QTL99612.1	265	Electron transfer flavoprotein	100	265	0	0	1	265	1	265	0	529
AZO93359.1	367	iron-containing alcohol dehydrogenase family protein	QTL99613.1	367	PFAM Iron-containing alcohol dehydrogenase	99.455	367	2	0	1	367	1	367	0	743
AZO93360.1	432	TRAP transporter large permease	QTL97465.1	429	Tripartite ATP-independent periplasmic transporter, DctM component	47.436	390	202	2	44	432	42	429	2.68e-121	357
AZO93361.1	180	TRAP transporter small permease	QTL99561.1	177	Tripartite ATP-independent periplasmic transporters, DctQ component	29.747	158	110	1	17	173	19	176	2.53e-25	93.2
AZO93362.1	358	DctP family TRAP transporter solute-binding subunit	QTL97463.1	347	Bacterial extracellular solute-binding protein, family 7	39.003	341	193	7	18	356	20	347	8.46e-73	227
AZO93363.1	302	dihydrodipicolinate synthase family protein	QTL99618.1	304	Dihydrodipicolinate synthetase family	44.108	297	160	3	1	295	4	296	1.4e-82	248
AZO93364.1	431	TRAP transporter large permease	QTL99615.1	431	COG1593 TRAP-type C4-dicarboxylate transport system large permease component	99.536	431	2	0	1	431	1	431	0	827
AZO93365.1	161	TRAP transporter small permease	QTL99616.1	181	TRAP transporter small permease subunit	98.758	161	2	0	1	161	21	181	5.35e-113	315
AZO93366.1	349	DctP family TRAP transporter solute-binding subunit	QTL99617.1	349	COG1638 TRAP-type C4-dicarboxylate transport system, periplasmic component	99.427	349	2	0	1	349	1	349	0	719
AZO93367.1	304	dihydrodipicolinate synthase family protein	QTL99618.1	304	Dihydrodipicolinate synthetase family	100	304	0	0	1	304	1	304	0	631
AZO93368.1	238	FadR family transcriptional regulator	QTL99619.1	238	FCD	99.16	238	2	0	1	238	1	238	4.28e-172	470
AZO93369.1	138	RbsD or FucU transport	QTL99620.1	138	Belongs to the RbsD FucU family	98.551	138	2	0	1	138	1	138	7.55e-99	276
AZO93370.1	328	ABC transporter permease	QTL99621.1	328	Belongs to the binding-protein-dependent transport system permease family	99.695	328	1	0	1	328	1	328	0	623
AZO93371.1	496	sugar ABC transporter ATP-binding protein	QTM00093.1	488	Part of the ABC transporter complex RbsABC involved in ribose import. Responsible for energy coupling to the transport system	98.566	488	7	0	9	496	1	488	0	969
AZO93372.1	316	sugar ABC transporter substrate-binding protein	QTL99622.1	316	Periplasmic binding protein LacI transcriptional regulator	99.684	316	1	0	1	316	1	316	0	629
AZO93373.1	310	1-phosphofructokinase family hexose kinase	QTL99623.1	310	Belongs to the carbohydrate kinase PfkB family. LacC subfamily	92.581	310	23	0	1	310	1	310	0	593
AZO93374.1	293	class II fructose-1,6-bisphosphate aldolase	QTL99624.1	293	PFAM ketose-bisphosphate aldolase, class-II	93.836	292	18	0	1	292	1	292	0	555
AZO93375.1	346	galactitol-1-phosphate 5-dehydrogenase	QTL99625.1	346	Zinc-binding dehydrogenase	97.688	346	8	0	1	346	1	346	0	702
AZO93376.1	510	carbohydrate kinase	QTL99626.1	510	FGGY family of carbohydrate kinases, N-terminal domain	98.039	510	10	0	1	510	1	510	0	1036
AZO93377.1	256	2-dehydro-3-deoxy-D-gluconate 5-dehydrogenase KduD	QTL99627.1	256	PFAM short-chain dehydrogenase reductase SDR	99.219	256	2	0	1	256	1	256	0	511
AZO93378.1	276	5-dehydro-4-deoxy-D-glucuronate isomerase	QTL99628.1	276	Catalyzes the isomerization of 5-dehydro-4-deoxy-D- glucuronate to 3-deoxy-D-glycero-2,5-hexodiulosonate	98.913	276	3	0	1	276	1	276	0	571
AZO93379.1	425	TRAP transporter large permease	QTL99629.1	425	Psort location CytoplasmicMembrane, score	99.059	425	4	0	1	425	1	425	0	814
AZO93380.1	155	TRAP transporter small permease	QTL99630.1	155	COG3090 TRAP-type C4-dicarboxylate transport system small permease component	99.355	155	1	0	1	155	1	155	1.13e-108	303
AZO93381.1	331	TRAP transporter substrate-binding protein	QTL99631.1	330	COG COG1638 TRAP-type C4-dicarboxylate transport system, periplasmic component	99.094	331	2	1	1	331	1	330	0	673
AZO93382.1	254	IclR family transcriptional regulator	QTL99632.1	254	transcriptional regulator	100	254	0	0	1	254	1	254	0	519
AZO93383.1	325	dTDP-glucose 4,6-dehydratase	QTL99633.1	325	Belongs to the NAD(P)-dependent epimerase dehydratase family. dTDP-glucose dehydratase subfamily	100	325	0	0	1	325	1	325	0	667
AZO93384.1	151	spore coat protein	QTL99634.1	151	Spore Coat	99.338	151	1	0	1	151	1	151	1.08e-113	315
AZO93385.1	198	HAD family phosphatase	QTL99635.1	199	IA, variant 3	99.495	198	1	0	1	198	1	198	5.44e-144	395
AZO93386.1	240	ABC transporter ATP-binding protein	QTL99636.1	240	Abc transporter	98.333	240	4	0	1	240	1	240	6.42e-173	472
AZO93387.1	257	ABC transporter permease	QTL99637.1	257	Abc transporter, permease protein	98.054	257	5	0	1	257	1	257	0	501
AZO93388.1	317	ABC transporter substrate-binding protein	QTL99638.1	317	COG0715 ABC-type nitrate sulfonate bicarbonate transport systems periplasmic components	99.369	317	2	0	1	317	1	317	0	638
AZO93389.1	502	sodium/proline symporter PutP	QTL99640.1	502	Belongs to the sodium solute symporter (SSF) (TC 2.A.21) family	99.801	502	1	0	1	502	1	502	0	980
AZO93390.1	345	hypothetical protein D7D81_01585	QTL99641.1	345	Patatin-like phospholipase	99.13	345	3	0	1	345	1	345	0	702
AZO93391.1	166	NUDIX hydrolase	QTM00096.1	144	NUDIX domain	98.611	144	2	0	23	166	1	144	8.49e-105	293
AZO93392.1	573	4Fe-4S dicluster domain-containing protein	QTL99642.1	573	Iron hydrogenase small subunit	100	573	0	0	1	573	1	573	0	1184
AZO93393.1	600	NADH-quinone oxidoreductase subunit NuoF	QTL99643.1	600	Respiratory-chain NADH dehydrogenase 51 Kd subunit	99.167	600	5	0	1	600	1	600	0	1212
AZO93394.1	124	(2Fe-2S) ferredoxin domain-containing protein	QTL99644.1	124	PFAM Respiratory-chain NADH dehydrogenase 24 Kd subunit	99.194	124	1	0	1	124	1	124	1.51e-87	247
AZO93395.1	183	ATP-binding protein	QTL99645.1	183	PFAM Histidine kinase-, DNA gyrase B-, and HSP90-like ATPase	98.361	183	3	0	1	183	1	183	9.47e-130	358
AZO93396.1	163	NADH-quinone oxidoreductase subunit NuoE	QTL99646.1	163	PFAM Respiratory-chain NADH dehydrogenase 24 Kd subunit	99.387	163	1	0	1	163	1	163	1.48e-120	333
AZO93397.1	454	PFL family protein	QTL99647.1	454	UPF0210 protein	99.339	454	3	0	1	454	1	454	0	899
AZO93398.1	89	ACT domain-containing protein	QTL99648.1	89	Belongs to the UPF0237 family	100	89	0	0	1	89	1	89	4.36e-61	177
AZO93399.1	246	PHP domain-containing protein	QTL99649.1	246	PFAM PHP domain	96.748	246	8	0	1	246	1	246	1.71e-178	487
AZO93400.1	110	serine kinase	QTL99650.1	110	PFAM DRTGG domain	97.273	110	3	0	1	110	1	110	3.81e-71	204
AZO93401.1	454	iron only hydrogenase large subunit	QTL99651.1	454	Putative Fe-S cluster	98.018	454	9	0	1	454	1	454	0	915
AZO93402.1	141	anti-sigma regulatory factor	QTL99652.1	141	Histidine kinase-, DNA gyrase B-, and HSP90-like ATPase	100	141	0	0	1	141	1	141	2.98e-100	280
AZO93403.1	118	hypothetical protein D7D81_01650	QTL99653.1	118	PFAM DRTGG domain	99.153	118	1	0	1	118	1	118	2.17e-83	236
AZO93404.1	382	UDP-N-acetylglucosamine 2-epimerase (non-hydrolyzing)	QTL99654.1	382	Belongs to the UDP-N-acetylglucosamine 2-epimerase family	98.691	382	5	0	1	382	1	382	0	768
AZO93405.1	209	hypothetical protein D7D81_01660	QTL99656.1	195	hypothetical protein GM661_17700	100	195	0	0	15	209	1	195	7.1e-140	385
AZO93406.1	245	hypothetical protein D7D81_01665	QTL99657.1	245	hypothetical protein GM661_17705	99.592	245	1	0	1	245	1	245	0	498
AZO93407.1	252	transposase	QTL99658.1	252	Transposase	98.016	252	5	0	1	252	1	252	0	508
AZO93408.1	960	helicase SNF2	QTL99659.1	960	SNF2 family N-terminal domain	97.917	960	20	0	1	960	1	960	0	1927
AZO93409.1	462	UDP-glucose/GDP-mannose dehydrogenase family protein	QTL99660.1	462	UDP-glucose GDP-mannose dehydrogenase family, NAD binding domain	100	462	0	0	1	462	1	462	0	934
AZO93410.1	477	phosphoglucomutase/phosphomannomutase family protein	QTL99894.1	579	Phosphoglucomutase phosphomannomutase alpha beta alpha domain I	27.85	535	311	22	2	469	39	565	1.7e-34	132
AZO93412.1	473	sensor histidine kinase	QTL98101.1	462	histidine kinase HAMP region domain protein	28.919	370	238	10	117	473	105	462	5.08e-30	118
AZO93413.1	221	DNA-binding response regulator	QTL97072.1	230	Transcriptional regulatory protein, C terminal	43.182	220	122	3	2	218	5	224	4.87e-62	190
AZO93414.1	351	ABC transporter substrate-binding protein	QTL99538.1	341	Bacterial extracellular solute-binding protein	33.333	342	209	10	12	349	6	332	1.62e-54	179
AZO93416.1	283	carbohydrate ABC transporter permease	QTL97238.1	293	Binding-protein-dependent transport system inner membrane component	36.293	259	159	2	26	283	40	293	1.61e-51	167
AZO93417.1	427	extracellular solute-binding protein	QTL99045.1	426	carbohydrate transport	26.276	392	210	21	1	352	1	353	2.59e-19	86.3
AZO93418.1	69	hypothetical protein D7D81_01730	QTL99661.1	265	Part of the ABC transporter complex PstSACB involved in phosphate import. Responsible for energy coupling to the transport system	94.203	69	4	0	1	69	197	265	8.71e-43	135
AZO93420.1	473	sugar transferase	QTL99665.1	473	Exopolysaccharide biosynthesis polyprenyl glycosylphosphotransferase	98.52	473	7	0	1	473	1	473	0	935
AZO93421.1	148	N-acetyltransferase	QTL99666.1	148	Acetyltransferase (GNAT) domain	98.649	148	2	0	1	148	1	148	3.23e-108	301
AZO93422.1	358	mannose-1-phosphate guanylyltransferase	QTL99667.1	358	PFAM Nucleotidyl transferase	99.162	358	3	0	1	358	1	358	0	731
AZO93423.1	305	SDR family oxidoreductase	QTL99668.1	305	NAD dependent epimerase dehydratase family	98.033	305	6	0	1	305	1	305	0	616
AZO93425.1	225	FadR family transcriptional regulator	QTL99669.1	225	FCD	99.111	225	2	0	1	225	1	225	2.04e-167	457
AZO93426.1	483	FAD/NAD(P)-binding oxidoreductase	QTL99670.1	483	BFD-like [2Fe-2S] binding domain	97.723	483	11	0	1	483	1	483	0	983
AZO93427.1	413	FAD-binding protein	QTL99671.1	413	NAD(P)-binding Rossmann-like domain	97.094	413	12	0	1	413	1	413	0	825
AZO93428.1	126	DUF1667 domain-containing protein	QTL99672.1	126	Protein of unknown function (DUF1667)	99.206	126	1	0	1	126	1	126	2.18e-88	249
AZO93429.1	342	zinc-binding alcohol dehydrogenase family protein	QTL99595.1	336	Alcohol dehydrogenase GroES-like domain	39.881	336	200	1	1	336	1	334	5.05e-90	270
AZO93430.1	423	TRAP transporter large permease	QTL99451.1	423	mannitol 2-dehydrogenase activity	45.606	421	228	1	1	421	1	420	6.86e-134	388
AZO93431.1	194	TRAP transporter small permease	QTL97513.1	175	PFAM Tripartite ATP-independent periplasmic transporter DctQ component	27.742	155	107	2	5	159	13	162	2.81e-17	72.8
AZO93432.1	323	TRAP transporter substrate-binding protein	QTL99453.1	325	carbohydrate transport	38.957	326	192	6	2	323	3	325	3.16e-78	239
AZO93433.1	229	GntR family transcriptional regulator	QTL99676.1	229	transcriptional regulator (GntR	96.07	229	9	0	1	229	1	229	2.88e-164	449
AZO93434.1	495	hypothetical protein D7D81_01820	QTL99677.1	495	Belongs to the sodium solute symporter (SSF) (TC 2.A.21) family	99.798	495	1	0	1	495	1	495	0	962
AZO93435.1	187	chromate transporter	QTL99678.1	187	Chromate transporter	97.861	187	4	0	1	187	1	187	2.86e-128	355
AZO93436.1	192	chromate transporter	QTL99679.1	192	chromate transporter	97.917	192	4	0	1	192	1	192	4.23e-136	375
AZO93437.1	96	hypothetical protein D7D81_01835	QTL99680.1	89	hypothetical protein GM661_17830	92.708	96	0	1	1	96	1	89	1.07e-56	166
AZO93438.1	480	hypothetical protein D7D81_01845	QTL99681.1	480	ligase activity	99.167	480	4	0	1	480	1	480	0	990
AZO93439.1	429	TRAP transporter large permease	QTL99682.1	429	COG1593 TRAP-type C4-dicarboxylate transport system, large permease component	98.834	429	5	0	1	429	1	429	0	814
AZO93440.1	334	TRAP transporter substrate-binding protein	QTL99683.1	334	Bacterial extracellular solute-binding protein, family 7	99.401	334	2	0	1	334	1	334	0	686
AZO93441.1	210	TetR/AcrR family transcriptional regulator	QTL99684.1	210	Bacterial regulatory proteins, tetR family	98.095	210	4	0	1	210	1	210	1.46e-149	410
AZO93442.1	228	hypothetical protein D7D81_01870	QTL99685.1	228	hypothetical protein GM661_17865	99.561	228	1	0	1	228	1	228	2.03e-169	462
AZO93443.1	191	flavodoxin family protein	QTL99686.1	191	Flavodoxin-like fold	99.476	191	1	0	1	191	1	191	4.02e-141	388
AZO93444.1	310	YafY family transcriptional regulator	QTL99687.1	310	HTH domain	94.839	310	16	0	1	310	1	310	0	604
AZO93445.1	85	hypothetical protein D7D81_01885	QTL99688.1	80	Putative zinc ribbon domain	97.5	80	2	0	6	85	1	80	5e-57	166
AZO93446.1	199	nitroreductase family protein	QTL99689.1	199	PFAM Nitroreductase	98.995	199	2	0	1	199	1	199	4.99e-148	406
AZO93447.1	425	hypothetical protein D7D81_01895	QTL99690.1	425	hypothetical protein GM661_17890	95.765	425	18	0	1	425	1	425	0	804
AZO93448.1	259	DUF3307 domain-containing protein	QTL99691.1	259	DUF3307 domain-containing protein	96.911	259	8	0	1	259	1	259	2.05e-180	493
AZO93449.1	437	amidohydrolase	QTL99692.1	437	Peptidase dimerisation domain	97.936	436	9	0	1	436	1	436	0	876
AZO93450.1	154	hypothetical protein D7D81_01910	QTL99693.1	154	An automated process has identified a potential problem with this gene model	98.701	154	2	0	1	154	1	154	1.48e-106	297
AZO93451.1	297	DUF3100 domain-containing protein	QTL99694.1	297	Protein of unknown function (DUF3100)	99.327	297	2	0	1	297	1	297	0	571
AZO93452.1	350	SIS domain-containing protein	QTL99695.1	350	glutamine-fructose-6-phosphate transaminase (isomerizing) activity	94	350	21	0	1	350	1	350	0	674
AZO93453.1	367	hypothetical protein D7D81_01925	QTL99696.1	367	Catalyzes the phosphorylation of ribose at O-5 in a reaction requiring ATP and magnesium. The resulting D-ribose-5- phosphate can then be used either for sythesis of nucleotides, histidine, and tryptophan, or as a component of the pentose phosphate pathway	98.365	367	6	0	1	367	1	367	0	739
AZO93454.1	285	carbohydrate ABC transporter permease	QTL99697.1	285	Binding-protein-dependent transport system inner membrane component	99.649	285	1	0	1	285	1	285	0	565
AZO93455.1	301	sugar ABC transporter permease	QTL99698.1	301	Binding-protein-dependent transport system inner membrane component	99.003	301	3	0	1	301	1	301	0	593
AZO93456.1	427	extracellular solute-binding protein	QTL99699.1	427	Bacterial extracellular solute-binding protein	99.766	427	1	0	1	427	1	427	0	877
AZO93457.1	382	ROK family transcriptional regulator	QTL99700.1	382	ROK family	99.476	382	2	0	1	382	1	382	0	769
AZO93458.1	335	anion permease	QTL99701.1	335	Phosphate transporter family	97.612	335	8	0	1	335	1	335	0	638
AZO93459.1	608	adenylyl-sulfate kinase	QTL99702.1	608	Adenylylsulphate kinase	98.684	608	8	0	1	608	1	608	0	1238
AZO93460.1	299	sulfate adenylyltransferase subunit CysD	QTL99703.1	299	PFAM Phosphoadenosine phosphosulfate reductase	98.662	299	4	0	1	299	1	299	0	616
AZO93461.1	123	hypothetical protein D7D81_01965	QTL99704.1	123	hypothetical protein GM661_17960	98.374	123	2	0	1	123	1	123	9.48e-90	252
AZO93462.1	116	hypothetical protein D7D81_01970	QTL99705.1	116	hypothetical protein GM661_17965	99.138	116	1	0	1	116	1	116	1.35e-82	234
AZO93463.1	324	ribose ABC transporter permease	QTL99707.1	326	Branched-chain amino acid transport system / permease component	96.605	324	11	0	1	324	1	324	0	608
AZO93464.1	125	XRE family transcriptional regulator	QTL99710.1	125	Helix-turn-helix XRE-family like proteins	83.471	121	20	0	2	122	3	123	4.37e-62	182
AZO93465.1	563	AAA family ATPase	QTL99711.1	563	PFAM AAA-ATPase-like	96.448	563	20	0	1	563	1	563	0	1082
AZO93466.1	270	nuclease	QTL99712.1	240	nucleic acid binding	78.519	270	28	1	1	270	1	240	4.73e-149	413
AZO93467.1	565	AAA family ATPase	QTL99711.1	563	PFAM AAA-ATPase-like	82.124	565	99	1	1	565	1	563	0	936
AZO93468.1	138	DUF86 domain-containing protein	QTL97424.1	149	Protein of unknown function DUF86	35.714	84	52	2	47	129	46	128	1.06e-13	60.8
AZO93471.1	613	asparagine synthase (glutamine-hydrolyzing)	QTL98134.1	613	TIGRFAM asparagine synthase (glutamine-hydrolyzing)	31.589	535	288	20	8	495	1	504	6.31e-63	215
AZO93474.1	280	dTDP-4-dehydrorhamnose reductase	QTL96911.1	281	Catalyzes the reduction of dTDP-6-deoxy-L-lyxo-4- hexulose to yield dTDP-L-rhamnose	37.818	275	168	2	1	273	1	274	7.18e-63	196
AZO93475.1	343	dTDP-glucose 4,6-dehydratase	QTL99633.1	325	Belongs to the NAD(P)-dependent epimerase dehydratase family. dTDP-glucose dehydratase subfamily	59.062	320	126	3	1	320	1	315	1.31e-133	380
AZO93476.1	183	dTDP-4-dehydrorhamnose 3,5-epimerase	QTL99634.1	151	Spore Coat	31.429	140	85	5	21	157	15	146	3.62e-12	58.2
AZO93477.1	294	glucose-1-phosphate thymidylyltransferase	QTL99486.1	357	Nucleotidyl transferase	38.075	239	144	3	1	239	1	235	2.79e-47	159
AZO93480.1	366	glycosyltransferase family 4 protein	QTL99721.1	392	Glycosyltransferase Family 4	26.055	403	244	11	3	362	1	392	9.99e-21	89.4
AZO93481.1	263	glycosyltransferase family 2 protein	QTL96790.1	284	Glycosyltransferase like family 2	25.926	189	118	4	3	171	2	188	7.29e-12	60.8
AZO93483.1	376	NAD-dependent epimerase/dehydratase family protein	QTL99668.1	305	NAD dependent epimerase dehydratase family	31.014	345	187	7	1	345	1	294	4.35e-37	133
AZO93484.1	288	hypothetical protein D7D81_02105	QTL99739.1	294	hypothetical protein GM661_18150	34.014	294	149	9	1	264	1	279	1.01e-40	140
AZO93485.1	431	four-carbon acid sugar kinase family protein	QTL99742.1	421	Putative nucleotide-binding of sugar-metabolising enzyme	93.349	421	28	0	1	421	1	421	0	776
AZO93486.1	324	2-keto-3-deoxygluconate permease	QTL99743.1	324	2-keto-3-deoxygluconate	98.457	324	5	0	1	324	1	324	0	606
AZO93487.1	385	altronate dehydratase	QTL99258.1	387	D-galactarate dehydratase / Altronate hydrolase, C terminus	47.792	385	199	2	1	383	1	385	1.9e-123	358
AZO93488.1	97	D-galactarate dehydratase	QTM00077.1	104	SAF	50.505	99	44	4	1	95	1	98	1.27e-21	78.6
AZO93489.1	167	XRE family transcriptional regulator	QTL99745.1	166	helix-turn-helix domain-containing protein	95.652	161	7	0	1	161	1	161	4.07e-110	307
AZO93491.1	253	uridine phosphorylase	QTM00057.1	246	Phosphorylase superfamily	36.889	225	120	4	1	220	1	208	1.24e-40	137
AZO93492.1	325	hypothetical protein D7D81_02150	QTL98181.1	310	pfkB family carbohydrate kinase	23.208	293	195	11	22	298	13	291	5.99e-11	59.3
AZO93494.1	304	ABC transporter permease	QTL98888.1	312	Belongs to the binding-protein-dependent transport system permease family	41.379	290	164	3	11	298	17	302	2.74e-77	235
AZO93495.1	367	ABC transporter permease	QTL98889.1	361	Belongs to the binding-protein-dependent transport system permease family	39.466	337	202	2	1	336	4	339	2e-70	221
AZO93496.1	512	ABC transporter ATP-binding protein	QTL99985.1	504	ABC transporter	46.64	491	261	1	9	499	4	493	4.94e-160	461
AZO93497.1	342	BMP family ABC transporter substrate-binding protein	QTL98891.1	331	ABC transporter substrate-binding protein PnrA-like	38.871	319	187	4	23	340	18	329	2.9e-73	227
AZO93498.1	244	GntR family transcriptional regulator	QTL99117.1	243	UbiC transcription regulator-associated domain protein	36.596	235	149	0	5	239	7	241	1.97e-49	159
AZO93499.1	166	hypothetical protein D7D81_02185	QTL99772.1	166	hypothetical protein GM661_18330	98.795	166	2	0	1	166	1	166	2.41e-111	310
AZO93500.1	416	adenosylhomocysteinase	QTL99773.1	416	May play a key role in the regulation of the intracellular concentration of adenosylhomocysteine	97.837	416	9	0	1	416	1	416	0	835
AZO93501.1	241	glucosamine-6-phosphate deaminase	QTL99778.1	241	Catalyzes the reversible isomerization-deamination of glucosamine 6-phosphate (GlcN6P) to form fructose 6-phosphate (Fru6P) and ammonium ion	87.552	241	30	0	1	241	1	241	8.82e-163	447
AZO93502.1	385	N-acetylglucosamine-6-phosphate deacetylase	QTL99779.1	380	Belongs to the metallo-dependent hydrolases superfamily. NagA family	88.684	380	43	0	1	380	1	380	0	679
AZO93503.1	577	phosphoenolpyruvate--protein phosphotransferase	QTL97650.1	572	General (non sugar-specific) component of the phosphoenolpyruvate-dependent sugar phosphotransferase system (sugar PTS). This major carbohydrate active-transport system catalyzes the phosphorylation of incoming sugar substrates concomitantly with their translocation across the cell membrane. Enzyme I transfers the phosphoryl group from phosphoenolpyruvate (PEP) to the phosphoryl carrier protein (…	56.469	572	242	2	8	574	3	572	0	656
AZO93504.1	161	PTS glucose transporter subunit IIA	QTL99775.1	159	phosphoenolpyruvate-dependent sugar phosphotransferase system, EIIA 1	57.051	156	66	1	2	156	1	156	1.31e-52	161
AZO93506.1	475	PTS sugar transporter	QTL99780.1	475	phosphotransferase system, EIIB	95.579	475	21	0	1	475	1	475	0	847
AZO93507.1	282	PRD domain-containing protein	QTL99776.1	281	transcriptional antiterminator	50.714	280	137	1	1	280	1	279	6.56e-100	291
AZO93509.1	241	glucosamine-6-phosphate deaminase	QTL99778.1	241	Catalyzes the reversible isomerization-deamination of glucosamine 6-phosphate (GlcN6P) to form fructose 6-phosphate (Fru6P) and ammonium ion	94.606	241	13	0	1	241	1	241	6.49e-173	472
AZO93510.1	416	gfo/Idh/MocA family oxidoreductase	QTL99781.1	416	Oxidoreductase NAD-binding domain protein	96.126	413	16	0	1	413	1	413	0	830
AZO93511.1	279	carbohydrate ABC transporter permease	QTL99782.1	279	Binding-protein-dependent transport system inner membrane component	98.925	279	3	0	1	279	1	279	0	552
AZO93512.1	408	sugar ABC transporter substrate-binding protein	QTL99783.1	408	PFAM Bacterial extracellular solute-binding protein	92.892	408	29	0	1	408	1	408	0	770
AZO93513.1	380	ROK family transcriptional regulator	QTL99784.1	380	ROK family	98.945	379	4	0	1	379	1	379	0	768
AZO93514.1	114	phage holin family protein	QTL99786.1	114	Mycobacterial 4 TMS phage holin, superfamily IV	99.123	114	1	0	1	114	1	114	1.18e-73	211
AZO93515.1	298	4-hydroxy-tetrahydrodipicolinate synthase	QTL99787.1	298	Catalyzes the condensation of (S)-aspartate-beta- semialdehyde (S)-ASA and pyruvate to 4-hydroxy- tetrahydrodipicolinate (HTPA)	98.322	298	5	0	1	298	1	298	0	601
AZO93516.1	384	iron-containing alcohol dehydrogenase	QTL99788.1	384	alcohol dehydrogenase	98.438	384	6	0	1	384	1	384	0	750
AZO93517.1	432	TRAP transporter large permease	QTL99789.1	432	Tripartite ATP-independent periplasmic transporter, DctM component	100	432	0	0	1	432	1	432	0	832
AZO93518.1	171	TRAP transporter small permease	QTL99790.1	171	TRAP transporter small permease subunit	100	171	0	0	1	171	1	171	2.01e-123	341
AZO93519.1	344	DctP family TRAP transporter solute-binding subunit	QTL99791.1	344	extracellular solute-binding protein, family 7	99.709	344	1	0	1	344	1	344	0	708
AZO93520.1	315	hypothetical protein D7D81_02305	QTL99792.1	315	D-isomer specific 2-hydroxyacid dehydrogenase	99.683	315	1	0	1	315	1	315	0	635
AZO93521.1	342	4-hydroxythreonine-4-phosphate dehydrogenase PdxA	QTL99793.1	342	PFAM Pyridoxal phosphate biosynthetic protein PdxA	97.661	342	8	0	1	342	1	342	0	674
AZO93522.1	439	four-carbon acid sugar kinase family protein	QTL99794.1	439	kinase activity	99.317	439	3	0	1	439	1	439	0	881
AZO93523.1	68	hypothetical protein D7D81_02320	QTL99795.1	68	hypothetical protein GM661_18455	97.059	68	2	0	1	68	1	68	4.38e-42	127
AZO93524.1	698	PAS domain-containing protein	QTL99796.1	698	transcription factor binding	99.857	698	1	0	1	698	1	698	0	1396
AZO93525.1	679	methyl-accepting chemotaxis protein	QTL99797.1	679	Methyl-accepting chemotaxis protein (MCP) signaling domain	99.705	679	2	0	1	679	1	679	0	1353
AZO93526.1	305	cysteine synthase A	QTL99798.1	305	Cysteine synthase A	98.689	305	4	0	1	305	1	305	0	599
AZO93527.1	215	serine O-acetyltransferase	QTL99799.1	215	TIGRFAM serine O-acetyltransferase	99.07	215	2	0	1	215	1	215	2.64e-154	423
AZO93528.1	110	dinitrogenase iron-molybdenum cofactor	QTL99800.1	110	PFAM Dinitrogenase iron-molybdenum cofactor	100	110	0	0	1	110	1	110	1.07e-79	226
AZO93529.1	280	(4Fe-4S)-binding protein	QTL99801.1	280	CobQ CobB MinD ParA nucleotide binding domain	98.214	280	5	0	1	280	1	280	0	566
AZO93530.1	125	dinitrogenase iron-molybdenum cofactor biosynthesis protein	QTM00105.1	122	PFAM Dinitrogenase iron-molybdenum cofactor	97.541	122	3	0	4	125	1	122	1.14e-84	239
AZO93531.1	67	aspartyl-phosphate phosphatase Spo0E family protein	QTM00106.1	67	Spo0E family sporulation regulatory protein-aspartic acid phosphatase	98.507	67	1	0	1	67	1	67	2.74e-43	130
AZO93532.1	423	adenylosuccinate synthase	QTL99802.1	423	Plays an important role in the de novo pathway of purine nucleotide biosynthesis. Catalyzes the first committed step in the biosynthesis of AMP from IMP	98.818	423	5	0	1	423	1	423	0	848
AZO93533.1	436	adenylosuccinate lyase	QTL99803.1	436	Belongs to the lyase 1 family. Adenylosuccinate lyase subfamily	99.312	436	3	0	1	436	1	436	0	889
AZO93534.1	341	DnaD domain protein	QTL99804.1	341	Replication initiation and membrane attachment	98.534	341	5	0	1	341	1	341	0	695
AZO93535.1	459	helicase DnaB	QTL99805.1	459	Replicative DNA helicase	100	459	0	0	1	459	1	459	0	931
AZO93536.1	66	hypothetical protein D7D81_02395	QTL99806.1	65	hypothetical protein GM661_18530	98.462	65	1	0	1	65	1	65	3.4e-42	128
AZO93537.1	64	DUF350 domain-containing protein	QTL99807.1	64	Domain of Unknown Function (DUF350)	100	64	0	0	1	64	1	64	1.83e-40	123
AZO93538.1	70	DUF350 domain-containing protein	QTL99808.1	70	Domain of Unknown Function (DUF350)	100	70	0	0	1	70	1	70	8.91e-45	135
AZO93539.1	510	polyamine aminopropyltransferase	QTL99810.1	510	Catalyzes the irreversible transfer of a propylamine group from the amino donor S-adenosylmethioninamine (decarboxy- AdoMet) to putrescine (1,4-diaminobutane) to yield spermidine	99.804	510	1	0	1	510	1	510	0	1028
AZO93540.1	159	DUF4247 domain-containing protein	QTL99811.1	158	DUF4247 domain-containing protein	99.367	158	1	0	2	159	1	158	1.25e-113	315
AZO93541.1	184	DUF2617 family protein	QTL99812.1	184	DUF2617 family protein	98.37	184	3	0	1	184	1	184	1.11e-133	368
AZO93542.1	227	PspA/IM30 family protein	QTL99813.1	227	PspA IM30 family	99.559	227	1	0	1	227	1	227	2.16e-158	434
AZO93543.1	172	DUF4178 domain-containing protein	QTL99814.1	172	Domain of unknown function (DUF4178)	96.512	172	6	0	1	172	1	172	9.81e-121	335
AZO93544.1	644	ATP-dependent protease, Lon family	QTL99816.1	644	Magnesium chelatase, subunit ChlI	99.534	644	3	0	1	644	1	644	0	1295
AZO93545.1	147	50S ribosomal protein L9	QTL99817.1	147	Binds to the 23S rRNA	97.959	147	3	0	1	147	1	147	1.14e-98	277
AZO93546.1	302	DUF2232 domain-containing protein	QTL99818.1	302	DUF2232 domain-containing protein	98.675	302	4	0	1	302	1	302	0	569
AZO93547.1	71	30S ribosomal protein S18	QTL99819.1	71	Binds as a heterodimer with protein S6 to the central domain of the 16S rRNA, where it helps stabilize the platform of the 30S subunit	100	71	0	0	1	71	1	71	3.62e-49	145
AZO93548.1	146	single-stranded DNA-binding protein	QTL99820.1	146	TIGRFAM single stranded DNA-binding protein (ssb)	98.63	146	2	0	1	146	1	146	2.51e-105	293
AZO93549.1	96	30S ribosomal protein S6	QTL99821.1	96	Binds together with S18 to 16S ribosomal RNA	100	96	0	0	1	96	1	96	4.73e-64	185
AZO93550.1	93	hypothetical protein D7D81_02465	QTL99822.1	93	hypothetical protein GM661_18610	92.473	93	7	0	1	93	1	93	5.88e-58	170
AZO93551.1	84	hypothetical protein D7D81_02470	QTL99823.1	84	hypothetical protein GM661_18615	97.619	84	2	0	1	84	1	84	1.61e-54	160
AZO93552.1	64	hypothetical protein D7D81_02475	QTL99824.1	64	hypothetical protein GM661_18620	96.875	64	2	0	1	64	1	64	6.02e-44	132
AZO93553.1	98	hypothetical protein D7D81_02485	QTL99825.1	98	hypothetical protein GM661_18630	98.98	98	1	0	1	98	1	98	1.88e-65	189
AZO93554.1	81	hypothetical protein D7D81_02490	QTL99826.1	81	hypothetical protein GM661_18635	92.593	81	6	0	1	81	1	81	9.18e-51	150
AZO93555.1	161	hypothetical protein D7D81_02495	QTL99827.1	161	hypothetical protein GM661_18640	89.441	161	17	0	1	161	1	161	1.46e-106	298
AZO93556.1	577	hypothetical protein D7D81_02500	QTL99828.1	578	hypothetical protein GM661_18645	66.834	597	159	10	1	577	1	578	0	745
AZO93557.1	713	hypothetical protein D7D81_02505	QTL99829.1	919	hypothetical protein GM661_18650	95.039	645	31	1	69	713	276	919	0	1243
AZO93560.1	117	hypothetical protein D7D81_02520	QTL99831.1	117	hypothetical protein GM661_18660	98.291	117	2	0	1	117	1	117	1.56e-82	234
AZO93561.1	135	hypothetical protein D7D81_02525	QTL99832.1	135	hypothetical protein GM661_18665	97.778	135	3	0	1	135	1	135	1.56e-96	270
AZO93562.1	868	hypothetical protein D7D81_02530	QTL99833.1	868	hypothetical protein GM661_18670	95.276	868	41	0	1	868	1	868	0	1659
AZO93563.1	114	hypothetical protein D7D81_02535	QTL99834.1	114	hypothetical protein GM661_18675	99.123	114	1	0	1	114	1	114	1.37e-80	228
AZO93564.1	559	hypothetical protein D7D81_02540	QTL99835.1	559	hypothetical protein GM661_18680	87.657	559	69	0	1	559	1	559	0	978
AZO93565.1	170	hypothetical protein D7D81_02545	QTL99836.1	170	hypothetical protein GM661_18685	98.235	170	3	0	1	170	1	170	2e-116	323
AZO93566.1	250	hypothetical protein D7D81_02550	QTL99837.1	250	hypothetical protein GM661_18690	98.4	250	4	0	1	250	1	250	8.69e-179	488
AZO93567.1	157	hypothetical protein D7D81_02555	QTL99838.1	157	hypothetical protein GM661_18695	99.363	157	1	0	1	157	1	157	3.52e-114	317
AZO93568.1	124	XRE family transcriptional regulator	QTL99840.1	124	helix-turn-helix domain-containing protein	99.194	124	1	0	1	124	1	124	3.44e-87	246
AZO93569.1	197	sigma-70 family RNA polymerase sigma factor	QTL99841.1	197	sigma-70 family RNA polymerase sigma factor	97.97	197	4	0	1	197	1	197	1.31e-135	374
AZO93570.1	131	hypothetical protein D7D81_02570	QTL99842.1	123	hypothetical protein GM661_18715	92.366	131	2	1	1	131	1	123	3.02e-81	231
AZO93571.1	570	phosphoenolpyruvate--protein phosphotransferase	QTL99843.1	570	General (non sugar-specific) component of the phosphoenolpyruvate-dependent sugar phosphotransferase system (sugar PTS). This major carbohydrate active-transport system catalyzes the phosphorylation of incoming sugar substrates concomitantly with their translocation across the cell membrane. Enzyme I transfers the phosphoryl group from phosphoenolpyruvate (PEP) to the phosphoryl carrier protein (…	97.193	570	16	0	1	570	1	570	0	1120
AZO93572.1	89	HPr family phosphocarrier protein	QTL99844.1	89	TIGRFAM Phosphotransferase System HPr (HPr) Family	100	89	0	0	1	89	1	89	1.26e-61	179
AZO93573.1	461	PTS fructose transporter subunit IIBC	QTL99845.1	461	PTS system, fructose subfamily, IIC	98.915	461	5	0	1	461	1	461	0	904
AZO93574.1	154	PTS sugar transporter subunit IIA	QTL99846.1	154	PFAM phosphoenolpyruvate-dependent sugar phosphotransferase system EIIA 2	98.701	154	2	0	1	154	1	154	1.52e-108	302
AZO93575.1	309	1-phosphofructokinase	QTL99847.1	309	Belongs to the carbohydrate kinase PfkB family. LacC subfamily	98.706	309	4	0	1	309	1	309	0	617
AZO93576.1	253	DeoR/GlpR transcriptional regulator	QTM00109.1	253	PFAM regulatory protein DeoR	99.209	253	2	0	1	253	1	253	0	501
AZO93577.1	363	redox-regulated ATPase YchF	QTL99848.1	363	ATPase that binds to both the 70S ribosome and the 50S ribosomal subunit in a nucleotide-independent manner	99.174	363	3	0	1	363	1	363	0	729
AZO93578.1	66	DUF951 domain-containing protein	QTL99849.1	66	PFAM Bacterial protein of	98.485	66	1	0	1	66	1	66	3.8e-45	135
AZO93579.1	284	mechanosensitive ion channel family protein	QTL99850.1	284	Mechanosensitive ion channel	99.648	284	1	0	1	284	1	284	0	556
AZO93580.1	478	glycine dehydrogenase subunit 2	QTL99851.1	478	The glycine cleavage system catalyzes the degradation of glycine. The P protein binds the alpha-amino group of glycine through its pyridoxal phosphate cofactor	99.163	478	4	0	1	478	1	478	0	970
AZO93581.1	448	aminomethyl-transferring glycine dehydrogenase subunit GcvPA	QTL99852.1	448	The glycine cleavage system catalyzes the degradation of glycine. The P protein binds the alpha-amino group of glycine through its pyridoxal phosphate cofactor	98.661	448	6	0	1	448	1	448	0	907
AZO93582.1	128	glycine cleavage system protein GcvH	QTL99853.1	128	The glycine cleavage system catalyzes the degradation of glycine. The H protein shuttles the methylamine group of glycine from the P protein to the T protein	98.438	128	2	0	1	128	1	128	3.5e-89	251
AZO93583.1	356	glycine cleavage system aminomethyltransferase GcvT	QTL99854.1	356	The glycine cleavage system catalyzes the degradation of glycine	99.438	356	2	0	1	356	1	356	0	720
AZO93584.1	350	hypothetical protein D7D81_02640	QTL99855.1	350	Psort location CytoplasmicMembrane, score	99.429	350	2	0	1	350	1	350	0	677
AZO93585.1	190	spore protease YyaC	QTL99856.1	190	Sporulation protein YyaC	98.947	190	2	0	1	190	1	190	1.26e-138	381
AZO93586.1	140	polymer-forming cytoskeletal protein	QTL99857.1	140	Integral membrane protein CcmA involved in cell shape determination	99.286	140	1	0	1	140	1	140	1.01e-92	261
AZO93587.1	333	hypothetical protein D7D81_02655	QTL99858.1	333	PFAM Peptidase family M23	99.099	333	3	0	1	333	1	333	0	679
AZO93588.1	224	DUF554 domain-containing protein	QTL99859.1	224	Na channel or pump	99.554	224	1	0	1	224	1	224	9.83e-155	425
AZO93589.1	218	TrkA family potassium uptake protein	QTL99860.1	218	PFAM TrkA-N domain	99.083	218	2	0	1	218	1	218	2.52e-155	426
AZO93590.1	286	ParB/RepB/Spo0J family partition protein	QTL99863.1	286	Belongs to the ParB family	100	286	0	0	1	286	1	286	0	579
AZO93591.1	253	ParA family protein	QTL99864.1	253	PFAM CobQ CobB MinD ParA nucleotide binding domain	99.605	253	1	0	1	253	1	253	0	506
AZO93592.1	266	nucleoid occlusion protein	QTL99865.1	266	Belongs to the ParB family	99.248	266	2	0	1	266	1	266	0	532
AZO93593.1	241	16S rRNA (guanine(527)-N(7))-methyltransferase RsmG	QTL99866.1	241	Specifically methylates the N7 position of a guanine in 16S rRNA	98.34	241	4	0	1	241	1	241	4.4e-177	483
AZO93594.1	635	tRNA uridine-5-carboxymethylaminomethyl(34) synthesis enzyme MnmG	QTL99867.1	630	NAD-binding protein involved in the addition of a carboxymethylaminomethyl (cmnm) group at the wobble position (U34) of certain tRNAs, forming tRNA-cmnm(5)s(2)U34	99.046	629	6	0	1	629	1	629	0	1271
AZO93595.1	464	tRNA uridine-5-carboxymethylaminomethyl(34) synthesis GTPase MnmE	QTL99868.1	464	Exhibits a very high intrinsic GTPase hydrolysis rate. Involved in the addition of a carboxymethylaminomethyl (cmnm) group at the wobble position (U34) of certain tRNAs, forming tRNA- cmnm(5)s(2)U34	99.138	464	4	0	1	464	1	464	0	917
AZO93596.1	218	protein jag	QTL99869.1	218	single-stranded nucleic acid binding R3H	99.541	218	1	0	1	218	1	218	2.71e-159	436
AZO93597.1	208	protein translocase component YidC	QTL99870.1	208	TIGRFAM membrane protein insertase, YidC Oxa1 family	100	208	0	0	1	208	1	208	5.57e-154	422
AZO93598.1	69	membrane protein insertion efficiency factor YidD	QTM00110.1	69	Could be involved in insertion of integral membrane proteins into the membrane	100	69	0	0	1	69	1	69	2.87e-47	141
AZO93599.1	109	ribonuclease P protein component	QTL99871.1	109	RNaseP catalyzes the removal of the 5'-leader sequence from pre-tRNA to produce the mature 5'-terminus. It can also cleave other RNA substrates such as 4.5S RNA. The protein component plays an auxiliary but essential role in vivo by binding to the 5'-leader sequence and broadening the substrate specificity of the ribozyme	98.165	109	2	0	1	109	1	109	7.49e-74	211
AZO93600.1	472	chromosomal replication initiator protein DnaA	QTL96469.1	472	it binds specifically double-stranded DNA at a 9 bp consensus (dnaA box) 5'-TTATC CA A CA A-3'. DnaA binds to ATP and to acidic phospholipids	99.788	472	1	0	1	472	1	472	0	963
AZO93601.1	371	DNA polymerase III subunit beta	QTL96470.1	373	Confers DNA tethering and processivity to DNA polymerases and other proteins. Acts as a clamp, forming a ring around DNA (a reaction catalyzed by the clamp-loading complex) which diffuses in an ATP-independent manner freely and bidirectionally along dsDNA. Initially characterized for its ability to contact the catalytic subunit of DNA polymerase III (Pol III), a complex, multichain enzyme respons…	99.196	373	1	1	1	371	1	373	0	741
AZO93602.1	72	RNA-binding S4 domain-containing protein	QTL96471.1	72	PFAM S4 domain	98.611	72	1	0	1	72	1	72	1.94e-47	141
AZO93603.1	368	DNA replication/repair protein RecF	QTL96472.1	368	it is required for DNA replication and normal SOS inducibility. RecF binds preferentially to single-stranded, linear DNA. It also seems to bind ATP	98.913	368	4	0	1	368	1	368	0	726
AZO93604.1	86	DUF370 domain-containing protein	QTL96473.1	86	Domain of unknown function (DUF370)	100	86	0	0	1	86	1	86	1.17e-59	173
AZO93605.1	643	DNA topoisomerase (ATP-hydrolyzing) subunit B	QTL96474.1	643	A type II topoisomerase that negatively supercoils closed circular double-stranded (ds) DNA in an ATP-dependent manner to modulate DNA topology and maintain chromosomes in an underwound state. Negative supercoiling favors strand separation, and DNA replication, transcription, recombination and repair, all of which involve strand separation. Also able to catalyze the interconversion of other topol…	99.533	643	3	0	1	643	1	643	0	1299
AZO93606.1	817	DNA gyrase subunit A	QTL96475.1	817	A type II topoisomerase that negatively supercoils closed circular double-stranded (ds) DNA in an ATP-dependent manner to modulate DNA topology and maintain chromosomes in an underwound state. Negative supercoiling favors strand separation, and DNA replication, transcription, recombination and repair, all of which involve strand separation. Also able to catalyze the interconversion of other topol…	99.143	817	7	0	1	817	1	817	0	1630
AZO93607.1	334	sugar ABC transporter substrate-binding protein	QTL96476.1	334	Periplasmic binding protein domain	97.904	334	7	0	1	334	1	334	0	664
AZO93608.1	370	spore gernimation protein	QTL96477.1	370	TIGRFAM spore germination protein (amino acid permease)	98.108	370	7	0	1	370	1	370	0	709
AZO93609.1	390	Ger(x)C family spore germination protein	QTL96478.1	390	PFAM Spore germination B3 GerAC like, C-terminal	97.692	390	9	0	1	390	1	390	0	786
AZO93610.1	201	hypothetical protein D7D81_02775	QTL96479.1	201	hypothetical protein GM661_00060	91.045	201	18	0	1	201	1	201	7.93e-118	330
AZO93611.1	78	hypothetical protein D7D81_02780	QTL96480.1	78	hypothetical protein GM661_00065	96.154	78	3	0	1	78	1	78	2.71e-47	142
AZO93612.1	95	4Fe-4S ferredoxin	QTL96481.1	95	Electron transfer flavoprotein-ubiquinone oxidoreductase, 4Fe-4S	100	95	0	0	1	95	1	95	8.17e-69	197
AZO93613.1	436	FAD-dependent oxidoreductase	QTL96482.1	436	PFAM Glucose inhibited division protein A	97.936	436	9	0	1	436	1	436	0	884
AZO93614.1	355	peptidylprolyl isomerase	QTL96483.1	355	PPIC-type PPIASE domain	98.873	355	4	0	1	355	1	355	0	694
AZO93615.1	324	LacI family transcriptional regulator	QTL96484.1	324	Periplasmic binding protein LacI transcriptional regulator	98.148	324	6	0	1	324	1	324	0	643
AZO93616.1	484	sucrose phosphorylase	QTL96485.1	484	Sucrose phosphorylase	98.76	484	6	0	1	484	1	484	0	981
AZO93617.1	422	carbohydrate ABC transporter substrate-binding protein	QTL96486.1	422	extracellular solute-binding	98.815	422	5	0	1	422	1	422	0	845
AZO93618.1	293	sugar ABC transporter permease	QTL96487.1	293	Abc transporter, permease protein	99.659	293	1	0	1	293	1	293	0	576
AZO93619.1	275	carbohydrate ABC transporter permease	QTL96488.1	275	PFAM Binding-protein-dependent transport system inner membrane component	99.636	275	1	0	1	275	1	275	0	549
AZO93620.1	247	basic amino acid ABC transporter substrate-binding protein	QTL96490.1	247	PFAM Bacterial extracellular solute-binding proteins, family 3	99.595	247	1	0	1	247	1	247	2.93e-179	489
AZO93621.1	225	amino acid ABC transporter permease	QTL96491.1	225	amino acid ABC transporter	99.556	225	1	0	1	225	1	225	3.48e-160	439
AZO93622.1	252	amino acid ABC transporter ATP-binding protein	QTL96492.1	252	PFAM ABC transporter	99.206	252	2	0	1	252	1	252	0	506
AZO93623.1	223	amino acid ABC transporter permease	QTL96493.1	223	amino acid ABC transporter	100	223	0	0	1	223	1	223	3.09e-160	439
AZO93624.1	402	amidohydrolase	QTL96494.1	402	PFAM Peptidase family M20 M25 M40	99.501	401	2	0	1	401	1	401	0	808
AZO93625.1	168	energy coupling factor transporter S component ThiW	QTL96495.1	168	Thiamine-precursor transporter protein (ThiW)	98.214	168	3	0	1	168	1	168	4.66e-116	322
AZO93626.1	274	bifunctional hydroxymethylpyrimidine kinase/phosphomethylpyrimidine kinase	QTL96496.1	274	PFAM Phosphomethylpyrimidine kinase type-1	95.985	274	11	0	1	274	1	274	0	513
AZO93627.1	271	hydroxyethylthiazole kinase	QTL96497.1	269	Condenses 4-methyl-5-(beta-hydroxyethyl)thiazole monophosphate (THZ-P) and 2-methyl-4-amino-5-hydroxymethyl pyrimidine pyrophosphate (HMP-PP) to form thiamine monophosphate (TMP)	96.283	269	10	0	1	269	1	269	0	523
AZO93628.1	503	extracellular solute-binding protein	QTL96498.1	503	Bacterial extracellular solute-binding protein	99.404	503	3	0	1	503	1	503	0	1021
AZO93629.1	575	sensor histidine kinase	QTL96499.1	575	Histidine kinase	98.609	575	8	0	1	575	1	575	0	1128
AZO93630.1	530	response regulator	QTL96500.1	530	response regulator receiver	98.491	530	8	0	1	530	1	530	0	1031
AZO93631.1	498	sugar ABC transporter ATP-binding protein	QTL96501.1	498	import. Responsible for energy coupling to the transport system	99.398	498	3	0	1	498	1	498	0	995
AZO93632.1	326	ABC transporter permease	QTL96502.1	326	Belongs to the binding-protein-dependent transport system permease family	100	326	0	0	1	326	1	326	0	632
AZO93633.1	422	serine--tRNA ligase	QTL96503.1	422	Catalyzes the attachment of serine to tRNA(Ser). Is also able to aminoacylate tRNA(Sec) with serine, to form the misacylated tRNA L-seryl-tRNA(Sec), which will be further converted into selenocysteinyl-tRNA(Sec)	97.867	422	9	0	1	422	1	422	0	854
AZO93634.1	256	glycerophosphodiester phosphodiesterase	QTL96506.1	248	glycerophosphoryl diester phosphodiesterase	97.967	246	5	0	1	246	1	246	0	494
AZO93635.1	244	GntR family transcriptional regulator	QTL96507.1	244	Psort location Cytoplasmic, score 8.87	100	244	0	0	1	244	1	244	1.26e-177	484
AZO93636.1	281	fructoselysine 6-kinase	QTL96508.1	278	pfkB family carbohydrate kinase	99.281	278	2	0	4	281	1	278	0	561
AZO93637.1	443	carbohydrate ABC transporter substrate-binding protein	QTL96509.1	424	extracellular solute-binding protein, family 1	99.057	424	4	0	20	443	1	424	0	863
AZO93638.1	293	sugar ABC transporter permease	QTL96510.1	293	Binding-protein-dependent transport system inner membrane component	98.635	293	4	0	1	293	1	293	0	581
AZO93639.1	280	carbohydrate ABC transporter permease	QTL96511.1	280	Binding-protein-dependent transport system inner membrane component	98.929	280	3	0	1	280	1	280	0	550
AZO93640.1	323	SIS domain-containing protein	QTL96512.1	323	Catalyzes the conversion of a range of fructosamine 6- phosphates to glucose 6-phosphate and a free amino acid	98.142	323	6	0	1	323	1	323	0	657
AZO93641.1	216	HAD family phosphatase	QTL96513.1	216	IA, variant 3	90.741	216	20	0	1	216	1	216	8.75e-141	389
AZO93642.1	439	ABC transporter substrate-binding protein	QTL96514.1	439	extracellular solute-binding protein, family 1	95.672	439	19	0	1	439	1	439	0	846
AZO93643.1	294	sugar ABC transporter permease	QTL96515.1	294	PFAM Binding-protein-dependent transport system inner membrane component	99.32	294	2	0	1	294	1	294	0	575
AZO93645.1	222	hypothetical protein D7D81_03015	QTL96582.1	240	hypothetical protein GM661_00645	99.099	222	2	0	1	222	19	240	2.69e-159	437
AZO93646.1	310	ketopantoate reductase family protein	QTL96583.1	310	Catalyzes the NADPH-dependent reduction of ketopantoate into pantoic acid	99.355	310	2	0	1	310	1	310	0	624
AZO93647.1	129	tetratricopeptide repeat protein	QTL96584.1	129	tetratricopeptide repeat protein	99.225	129	1	0	1	129	1	129	8.74e-91	255
AZO93648.1	69	GNAT family N-acetyltransferase	QTL96585.1	134	Acetyltransferase (GNAT) domain	100	67	0	0	3	69	68	134	1.23e-46	141
AZO93649.1	46	aspartyl-phosphate phosphatase Spo0E family protein	QTL96586.1	57	Spo0E family sporulation regulatory protein-aspartic acid phosphatase	100	46	0	0	1	46	12	57	7.85e-27	88.2
AZO93650.1	143	hypothetical protein D7D81_03040	QTL96587.1	142	hypothetical protein GM661_00670	99.296	142	1	0	1	142	1	142	3.68e-102	285
AZO93651.1	449	hypothetical protein D7D81_03045	QTL96597.1	449	surface antigen	99.332	449	3	0	1	449	1	449	0	920
AZO93652.1	597	DUF4445 domain-containing protein	QTL96598.1	597	PFAM 2Fe-2S iron-sulfur cluster binding domain	97.655	597	14	0	1	597	1	597	0	1179
AZO93654.1	334	TRAP transporter substrate-binding protein	QTL99453.1	325	carbohydrate transport	25.633	316	226	6	2	315	3	311	4.82e-36	129
AZO93656.1	428	TRAP transporter large permease	QTL99338.1	423	Tripartite ATP-independent periplasmic transporter, DctM component	43.839	422	236	1	4	425	1	421	7.9e-114	337
AZO93657.1	324	5-dehydro-2-deoxygluconokinase	QTL97921.1	322	Belongs to the carbohydrate kinase PfkB family	29.721	323	206	4	13	319	3	320	7.64e-42	144
AZO93658.1	239	GntR family transcriptional regulator	QTL98777.1	237	UTRA	38.136	236	138	7	1	231	1	233	1.43e-35	123
AZO93659.1	409	ABC transporter substrate-binding protein	QTL96599.1	409	Bacterial extracellular solute-binding protein	96.333	409	15	0	1	409	1	409	0	796
AZO93660.1	336	ATP-binding cassette domain-containing protein	QTL96601.1	336	Abc transporter	97.321	336	9	0	1	336	1	336	0	655
AZO93661.1	161	rubrerythrin	QTL96602.1	161	Rubrerythrin	99.379	161	1	0	1	161	1	161	6.95e-117	324
AZO93662.1	1148	2',3'-cyclic-nucleotide 2'-phosphodiesterase	QTL96606.1	1149	Belongs to the 5'-nucleotidase family	98.085	1149	21	1	1	1148	1	1149	0	2308
AZO93663.1	374	YibE/F family protein	QTL96607.1	373	YibE F family protein	98.928	373	4	0	1	373	1	373	0	716
AZO93665.1	339	3-deoxy-7-phosphoheptulonate synthase	QTL96608.1	339	PFAM DAHP synthetase I	100	339	0	0	1	339	1	339	0	688
AZO93666.1	207	metallophosphatase family protein	QTL96609.1	207	Calcineurin-like phosphoesterase	99.517	207	1	0	1	207	1	207	6.41e-149	409
AZO93667.1	334	hypothetical protein D7D81_03140	QTL96610.1	334	hypothetical protein GM661_00785	98.802	334	4	0	1	334	1	334	0	668
AZO93668.1	95	hypothetical protein D7D81_03145	QTL96611.1	95	hypothetical protein GM661_00790	75.789	95	23	0	1	95	1	95	2.77e-51	153
AZO93669.1	555	hydroxylamine reductase	QTL96612.1	555	Catalyzes the reduction of hydroxylamine to form NH(3) and H(2)O	99.279	555	4	0	1	555	1	555	0	1132
AZO93670.1	1177	pyruvate:ferredoxin (flavodoxin) oxidoreductase	QTL96613.1	1177	Oxidoreductase required for the transfer of electrons from pyruvate to flavodoxin	99.745	1177	3	0	1	1177	1	1177	0	2434
AZO93671.1	150	tRNA adenosine(34) deaminase TadA	QTL96614.1	150	Catalyzes the deamination of adenosine to inosine at the wobble position 34 of tRNA(Arg2)	99.333	150	1	0	1	150	1	150	3.63e-109	303
AZO93672.1	114	hypothetical protein D7D81_03170	QTL96615.1	96	hypothetical protein GM661_00815	96.875	96	3	0	19	114	1	96	2.73e-61	179
AZO93673.1	579	DNA polymerase III subunit gamma/tau	QTL96616.1	577	DNA polymerase III is a complex, multichain enzyme responsible for most of the replicative synthesis in bacteria. This DNA polymerase also exhibits 3' to 5' exonuclease activity	98.1	579	9	1	1	579	1	577	0	1144
AZO93674.1	102	YbaB/EbfC family nucleoid-associated protein	QTL96617.1	102	Binds to DNA and alters its conformation. May be involved in regulation of gene expression, nucleoid organization and DNA protection	100	102	0	0	1	102	1	102	8.32e-69	198
AZO93675.1	198	recombination protein RecR	QTL96618.1	198	May play a role in DNA repair. It seems to be involved in an RecBC-independent recombinational process of DNA repair. It may act with RecF and RecO	99.495	198	1	0	1	198	1	198	4.95e-146	400
AZO93676.1	315	carbohydrate kinase	QTL96622.1	315	Belongs to the carbohydrate kinase PfkB family. LacC subfamily	99.048	315	3	0	1	315	1	315	0	640
AZO93677.1	153	CBS domain-containing protein	QTL96620.1	153	PFAM CBS domain containing protein	98.039	153	3	0	1	153	1	153	4.46e-108	301
AZO93678.1	430	cation:proton antiporter	QTL96621.1	430	PFAM sodium hydrogen exchanger	99.302	430	3	0	1	430	1	430	0	833
AZO93679.1	315	carbohydrate kinase	QTL96622.1	315	Belongs to the carbohydrate kinase PfkB family. LacC subfamily	99.048	315	3	0	1	315	1	315	0	642
AZO93680.1	153	CBS domain-containing protein	QTL96623.1	153	PFAM CBS domain containing protein	98.039	153	3	0	1	153	1	153	2.79e-107	299
AZO93681.1	435	cation:proton antiporter	QTL96624.1	435	PFAM sodium hydrogen exchanger	99.77	435	1	0	1	435	1	435	0	851
AZO93682.1	148	DMT family transporter	QTL96625.1	148	Putative inner membrane exporter, YdcZ	99.324	148	1	0	1	148	1	148	2.44e-101	284
AZO93683.1	106	DUF2508 family protein	QTL96626.1	106	Protein of unknown function (DUF2508)	99.057	106	1	0	1	106	1	106	8.99e-75	213
AZO93684.1	415	[FeFe] hydrogenase H-cluster maturation GTPase HydF	QTL96627.1	415	small GTP-binding protein	99.518	415	2	0	1	415	1	415	0	846
AZO93685.1	138	nickel-responsive transcriptional regulator NikR	QTL96629.1	138	transcriptional regulator	99.275	138	1	0	1	138	1	138	6.07e-98	274
AZO93686.1	803	formate C-acetyltransferase/glycerol dehydratase family glycyl radical enzyme	QTL96630.1	803	Glycine radical	98.63	803	11	0	1	803	1	803	0	1646
AZO93687.1	309	glycyl-radical enzyme activating protein	QTL96631.1	309	4Fe-4S single cluster domain	98.382	309	5	0	1	309	1	309	0	623
AZO93688.1	332	LacI family transcriptional regulator	QTL96632.1	332	Bacterial regulatory proteins, lacI family	99.699	332	1	0	1	332	1	332	0	677
AZO93689.1	496	sugar ABC transporter ATP-binding protein	QTL96633.1	496	Part of the ABC transporter complex RbsABC involved in ribose import. Responsible for energy coupling to the transport system	98.79	496	6	0	1	496	1	496	0	993
AZO93690.1	312	ABC transporter permease	QTL96634.1	312	Belongs to the binding-protein-dependent transport system permease family	100	312	0	0	1	312	1	312	0	593
AZO93691.1	318	sugar ABC transporter substrate-binding protein	QTL96635.1	318	Periplasmic binding protein LacI transcriptional regulator	99.686	318	1	0	1	318	1	318	0	644
AZO93692.1	497	xylulokinase	QTL96636.1	497	FGGY family of carbohydrate kinases, C-terminal domain	99.195	497	4	0	1	497	1	497	0	1022
AZO93693.1	212	class II aldolase/adducin family protein	QTL96637.1	212	PFAM Class II Aldolase	99.528	212	1	0	1	212	1	212	2.47e-161	441
AZO93694.1	147	MarR family transcriptional regulator	QTL96638.1	147	helix_turn_helix multiple antibiotic resistance protein	97.959	147	3	0	1	147	1	147	1.91e-102	286
AZO93695.1	390	glycosyl transferase	QTL96639.1	390	COG1819 Glycosyl transferases, related to UDP-glucuronosyltransferase	98.974	390	4	0	1	390	1	390	0	796
AZO93696.1	487	IMP dehydrogenase	QTL96640.1	487	Catalyzes the conversion of inosine 5'-phosphate (IMP) to xanthosine 5'-phosphate (XMP), the first committed and rate- limiting step in the de novo synthesis of guanine nucleotides, and therefore plays an important role in the regulation of cell growth	99.795	487	1	0	1	487	1	487	0	971
AZO93697.1	311	thioredoxin-disulfide reductase	QTL96641.1	311	Belongs to the class-II pyridine nucleotide-disulfide oxidoreductase family	99.678	311	1	0	1	311	1	311	0	624
AZO93698.1	221	thymidylate kinase	QTL96643.1	221	Phosphorylation of dTMP to form dTDP in both de novo and salvage pathways of dTTP synthesis	99.095	221	2	0	1	221	1	221	7.6e-166	452
AZO93699.1	109	hypothetical protein D7D81_03325	QTL96644.1	109	Cyclic-di-AMP receptor	100	109	0	0	1	109	1	109	4.3e-80	227
AZO93700.1	327	DNA polymerase III subunit delta'	QTL96645.1	327	TIGRFAM DNA polymerase III, delta	99.388	327	2	0	1	327	1	327	0	653
AZO93701.1	269	stage 0 sporulation protein	QTL96646.1	269	PFAM PSP1 C-terminal conserved region	98.885	269	3	0	1	269	1	269	0	530
AZO93702.1	102	DUF972 family protein	QTL96647.1	102	protein conserved in bacteria	100	102	0	0	1	102	1	102	9.1e-72	205
AZO93703.1	243	tRNA1(Val) (adenine(37)-N6)-methyltransferase	QTL96648.1	243	PFAM methyltransferase small	99.588	243	1	0	1	243	1	243	3.57e-178	486
AZO93704.1	288	16S rRNA (cytidine(1402)-2'-O)-methyltransferase	QTL96649.1	288	Catalyzes the 2'-O-methylation of the ribose of cytidine 1402 (C1402) in 16S rRNA	99.306	288	2	0	1	288	1	288	0	574
AZO93705.1	653	methionine--tRNA ligase	QTL96651.1	650	Is required not only for elongation of protein synthesis but also for the initiation of all mRNA translation through initiator tRNA(fMet) aminoacylation	99.081	653	3	1	1	653	1	650	0	1323
AZO93706.1	217	redox-sensing transcriptional repressor Rex	QTL96652.1	217	Modulates transcription in response to changes in cellular NADH NAD( ) redox state	100	217	0	0	1	217	1	217	9.8e-158	432
AZO93707.1	259	protein-glutamate O-methyltransferase CheR	QTL96653.1	259	PFAM CheR methyltransferase, SAM binding domain	98.842	259	3	0	1	259	1	259	0	522
AZO93708.1	344	chemotaxis response regulator protein-glutamate methylesterase	QTL96654.1	344	catalyzes the demethylation of specific methylglutamate residues introduced into the chemoreceptors (methyl-accepting chemotaxis proteins) by CheR	99.709	344	1	0	1	344	1	344	0	698
AZO93709.1	263	MBL fold metallo-hydrolase	QTL96655.1	263	PFAM Metallo-beta-lactamase superfamily	99.24	263	2	0	1	263	1	263	0	533
AZO93710.1	83	hypothetical protein D7D81_03385	QTL96656.1	83	hypothetical protein GM661_01035	97.59	83	2	0	1	83	1	83	5.69e-56	164
AZO93711.1	159	23S rRNA (pseudouridine(1915)-N(3))-methyltransferase RlmH	QTL96657.1	159	Specifically methylates the pseudouridine at position 1915 (m3Psi1915) in 23S rRNA	99.371	159	1	0	1	159	1	159	2.41e-116	322
AZO93712.1	122	hypothetical protein D7D81_03400	QTL96658.1	172	hypothetical protein GM661_01050	99.18	122	1	0	1	122	51	172	1.48e-88	251
AZO93713.1	307	hypothetical protein D7D81_03405	QTL96659.1	307	hypothetical protein GM661_01055	98.697	307	4	0	1	307	1	307	0	623
AZO93714.1	691	methyl-accepting chemotaxis protein	QTL96660.1	691	methyl-accepting chemotaxis protein	98.553	691	10	0	1	691	1	691	0	1354
AZO93715.1	547	HAMP domain-containing protein	QTL96661.1	554	Histidine kinase	96.881	545	17	0	1	545	1	545	0	1055
AZO93716.1	504	response regulator	QTL96662.1	504	response regulator receiver	97.222	504	14	0	1	504	1	504	0	967
AZO93717.1	327	TRAP transporter substrate-binding protein	QTL96663.1	327	extracellular solute-binding protein, family 7	98.471	327	5	0	1	327	1	327	0	660
AZO93718.1	181	TRAP transporter small permease	QTL96664.1	181	Tripartite ATP-independent periplasmic transporters, DctQ component	96.685	181	6	0	1	181	1	181	3.9e-129	357
AZO93719.1	429	TRAP transporter large permease	QTL96665.1	429	Tripartite ATP-independent periplasmic transporter, DctM component	98.368	429	7	0	1	429	1	429	0	822
AZO93720.1	282	AraC family transcriptional regulator	QTL96666.1	282	helix_turn_helix, arabinose operon control protein	98.936	282	3	0	1	282	1	282	0	552
AZO93721.1	171	AraC family transcriptional regulator	QTL96667.1	171	hypothetical protein GM661_01100	100	171	0	0	1	171	1	171	1.91e-127	352
AZO93722.1	160	tRNA (N6-threonylcarbamoyladenosine(37)-N6)-methyltransferase TrmO	QTL96668.1	160	Psort location Cytoplasmic, score 8.87	97.5	160	4	0	1	160	1	160	2.15e-117	325
AZO93723.1	192	DNA-3-methyladenine glycosylase I	QTL96669.1	192	PFAM Methyladenine glycosylase	95.833	192	8	0	1	192	1	192	8.2e-141	387
AZO93724.1	224	DNA-binding response regulator	QTL96670.1	224	PFAM response regulator receiver	100	224	0	0	1	224	1	224	2.93e-165	451
AZO93725.1	354	GHKL domain-containing protein	QTL96671.1	354	Histidine kinase	98.87	354	4	0	1	354	1	354	0	706
AZO93726.1	301	ATP-binding cassette domain-containing protein	QTL96672.1	301	Abc transporter	99.336	301	2	0	1	301	1	301	0	611
AZO93727.1	274	transporter	QTL96673.1	274	Transport permease protein	98.905	274	3	0	1	274	1	274	0	533
AZO93729.1	254	helix-turn-helix domain-containing protein	QTL96674.1	254	Helix-turn-helix domain	99.213	254	2	0	1	254	1	254	0	523
AZO93730.1	236	DUF421 domain-containing protein	QTL96675.1	203	Protein of unknown function (DUF421)	99.01	202	2	0	35	236	2	203	1.14e-146	404
AZO93731.1	311	AI-2E family transporter	QTL96676.1	340	sporulation integral membrane protein YtvI	99.349	307	2	0	1	307	1	307	0	590
AZO93732.1	240	4Fe-4S binding protein	QTL96677.1	240	4Fe-4S binding domain	99.167	240	2	0	1	240	1	240	4.07e-178	485
AZO93733.1	339	putative sulfate exporter family transporter	QTL96678.1	339	Psort location CytoplasmicMembrane, score 9.99	97.935	339	7	0	1	339	1	339	0	650
AZO93734.1	1050	hypothetical protein D7D81_03520	QTL96679.1	1050	hypothetical protein GM661_01165	98.286	1050	18	0	1	1050	1	1050	0	2107
AZO93735.1	587	methyl-accepting chemotaxis protein	QTL96680.1	592	methyl-accepting chemotaxis protein	95.911	587	24	0	1	587	1	587	0	1105
AZO93740.1	177	nicotinamidase	QTL96681.1	177	Pyrazinamidase	98.87	177	2	0	1	177	1	177	2.41e-130	359
AZO93741.1	570	methyl-accepting chemotaxis protein	QTL96682.1	570	Single cache domain 3	98.947	570	6	0	1	570	1	570	0	1109
AZO93742.1	61	hypothetical protein D7D81_03565	QTL96683.1	61	hypothetical protein GM661_01185	88.525	61	7	0	1	61	1	61	3.14e-35	110
AZO93743.1	677	methyl-accepting chemotaxis protein	QTL96684.1	677	chemotaxis	98.671	677	9	0	1	677	1	677	0	1333
AZO93744.1	579	biosynthetic-type acetolactate synthase large subunit	QTL99881.1	579	TIGRFAM acetolactate synthase, large subunit, biosynthetic type	98.446	579	9	0	1	579	1	579	0	1174
AZO93745.1	266	MurR/RpiR family transcriptional regulator	QTL96741.1	284	Helix-turn-helix domain, rpiR family	32.549	255	159	3	1	242	1	255	1.02e-34	123
AZO93747.1	497	PTS glucose transporter subunit IIB	QTL99780.1	475	phosphotransferase system, EIIB	40.631	507	246	11	2	492	5	472	8.95e-97	297
AZO93748.1	368	bifunctional diaminohydroxyphosphoribosylaminopyrimidine deaminase/5-amino-6-(5-phosphoribosylamino)uracil reductase RibD	QTL96685.1	368	Converts 2,5-diamino-6-(ribosylamino)-4(3h)-pyrimidinone 5'-phosphate into 5-amino-6-(ribosylamino)-2,4(1h,3h)- pyrimidinedione 5'-phosphate	95.924	368	15	0	1	368	1	368	0	721
AZO93749.1	398	bifunctional 3,4-dihydroxy-2-butanone-4-phosphate synthase/GTP cyclohydrolase II	QTL96686.1	407	Catalyzes the conversion of D-ribulose 5-phosphate to formate and 3,4-dihydroxy-2-butanone 4-phosphate	94.724	398	21	0	1	398	1	398	0	776
AZO93750.1	154	6,7-dimethyl-8-ribityllumazine synthase	QTL96687.1	154	Catalyzes the formation of 6,7-dimethyl-8- ribityllumazine by condensation of 5-amino-6-(D- ribitylamino)uracil with 3,4-dihydroxy-2-butanone 4-phosphate. This is the penultimate step in the biosynthesis of riboflavin	95.455	154	7	0	1	154	1	154	2.41e-107	299
AZO93751.1	330	LacI family transcriptional regulator	QTL96691.1	330	helix_turn _helix lactose operon repressor	98.485	330	5	0	1	330	1	330	0	655
AZO93752.1	311	D-allose transporter substrate-binding protein	QTL96692.1	311	PFAM periplasmic binding protein LacI transcriptional regulator	98.071	311	6	0	1	311	1	311	0	618
AZO93753.1	512	sugar ABC transporter ATP-binding protein	QTL96693.1	512	ATPases associated with a variety of cellular activities	97.656	512	12	0	1	512	1	512	0	996
AZO93754.1	316	D-allose ABC transporter permease	QTL96694.1	316	Belongs to the binding-protein-dependent transport system permease family	99.367	316	2	0	1	316	1	316	0	602
AZO93755.1	222	ribulose-phosphate 3-epimerase	QTL96695.1	222	Belongs to the ribulose-phosphate 3-epimerase family	97.748	222	5	0	1	222	1	222	2.1e-162	444
AZO93756.1	294	allose kinase	QTL96696.1	294	ROK family	99.66	294	1	0	1	294	1	294	0	586
AZO93757.1	146	ribose 5-phosphate isomerase B	QTL96697.1	146	Ribose 5-phosphate isomerase	100	146	0	0	1	146	1	146	2.27e-106	296
AZO93758.1	504	sensor histidine kinase	QTL99479.1	593	Histidine kinase-, DNA gyrase B-, and HSP90-like ATPase	35.021	237	142	4	269	504	364	589	2.27e-39	147
AZO93759.1	240	DNA-binding response regulator	QTL99480.1	228	PFAM response regulator receiver	47.414	232	108	6	6	231	2	225	2.66e-63	194
AZO93761.1	257	IclR family transcriptional regulator	QTL96698.1	257	helix_turn_helix isocitrate lyase regulation	98.054	257	5	0	1	257	1	257	0	518
AZO93762.1	341	chlorophyll synthesis pathway protein BchC	QTL96699.1	341	Alcohol dehydrogenase GroES-like domain	96.481	341	12	0	1	341	1	341	0	677
AZO93763.1	238	FadR family transcriptional regulator	QTL96700.1	238	FCD	97.899	238	5	0	1	238	1	238	3.13e-177	483
AZO93764.1	414	starvation-sensing protein RspA	QTL96701.1	414	Mandelate racemase / muconate lactonizing enzyme, C-terminal domain	96.135	414	16	0	1	414	1	414	0	829
AZO93765.1	353	DctP family TRAP transporter solute-binding subunit	QTL96710.1	353	carbohydrate transport	99.15	353	3	0	1	353	1	353	0	715
AZO93766.1	176	TRAP transporter small permease	QTL96711.1	176	Tripartite ATP-independent periplasmic transporters, DctQ component	99.432	176	1	0	1	176	1	176	1.72e-122	339
AZO93767.1	428	TRAP transporter large permease	QTL96712.1	428	mannitol 2-dehydrogenase activity	99.766	427	1	0	1	427	1	427	0	817
AZO93768.1	134	PIN domain-containing protein	QTL96705.1	134	PIN domain	97.015	134	4	0	1	134	1	134	1.75e-93	263
AZO93769.1	83	hypothetical protein D7D81_03715	QTL96706.1	83	hypothetical protein GM661_01315	100	83	0	0	1	83	1	83	1.64e-56	165
AZO93770.1	228	GntR family transcriptional regulator	QTL96707.1	228	transcriptional regulator (GntR	97.368	228	6	0	1	228	1	228	1.5e-167	457
AZO93771.1	338	zinc-binding alcohol dehydrogenase family protein	QTL96708.1	338	TIGRFAM 2-desacetyl-2-hydroxyethyl bacteriochlorophyllide A dehydrogenase	99.408	338	2	0	1	338	1	338	0	678
AZO93772.1	347	mannonate dehydratase	QTL96709.1	347	Catalyzes the dehydration of D-mannonate	99.424	347	2	0	1	347	1	347	0	706
AZO93773.1	353	DctP family TRAP transporter solute-binding subunit	QTL96710.1	353	carbohydrate transport	98.867	353	4	0	1	353	1	353	0	712
AZO93774.1	176	TRAP transporter small permease	QTL96711.1	176	Tripartite ATP-independent periplasmic transporters, DctQ component	99.432	176	1	0	1	176	1	176	1.72e-122	339
AZO93775.1	428	TRAP transporter large permease	QTL96712.1	428	mannitol 2-dehydrogenase activity	99.766	427	1	0	1	427	1	427	0	817
AZO93776.1	429	DUF2088 domain-containing protein	QTL96713.1	429	Domain of unknown function (DUF2088)	97.669	429	10	0	1	429	1	429	0	863
AZO93777.1	274	SDR family NAD(P)-dependent oxidoreductase	QTL96714.1	274	PFAM short-chain dehydrogenase reductase SDR	96.35	274	10	0	1	274	1	274	0	543
AZO93778.1	259	IclR family transcriptional regulator	QTL96715.1	259	helix_turn_helix isocitrate lyase regulation	95.367	259	12	0	1	259	1	259	0	501
AZO93779.1	326	TRAP transporter substrate-binding protein	QTL96716.1	326	carbohydrate transport	97.546	326	8	0	1	326	1	326	0	659
AZO93780.1	163	TRAP transporter small permease	QTL96717.1	163	Trap-type c4-dicarboxylate transport system, small permease component	93.252	163	11	0	1	163	1	163	8.67e-98	276
AZO93781.1	426	TRAP transporter large permease	QTL96718.1	426	mannitol 2-dehydrogenase activity	99.061	426	4	0	1	426	1	426	0	812
AZO93782.1	255	2-dehydro-3-deoxy-D-gluconate 5-dehydrogenase KduD	QTL96719.1	255	Short-chain dehydrogenase reductase SDR	97.647	255	6	0	1	255	1	255	0	503
AZO93783.1	348	zinc-binding dehydrogenase	QTL96720.1	347	Alcohol dehydrogenase GroES-like domain	96.839	348	10	1	1	348	1	347	0	679
AZO93784.1	257	IclR family transcriptional regulator	QTL96721.1	257	helix_turn_helix isocitrate lyase regulation	94.942	257	13	0	1	257	1	257	0	506
AZO93785.1	397	glutaredoxin	QTL96722.1	397	Pyridine nucleotide-disulphide oxidoreductase	95.214	397	19	0	1	397	1	397	0	742
AZO93787.1	99	hypothetical protein D7D81_03815	QTL96723.1	109	DUF2746 domain-containing protein	88.073	109	3	1	1	99	1	109	1.69e-61	179
AZO93788.1	140	hypothetical protein D7D81_03825	QTL96725.1	46	hypothetical protein GM661_01415	84.615	39	6	0	48	86	1	39	1.01e-17	68.6
AZO93789.1	252	DeoR/GlpR transcriptional regulator	QTL96727.1	252	COG1349 Transcriptional regulators of sugar metabolism	97.619	252	6	0	1	252	1	252	2.28e-178	487
AZO93790.1	223	class II aldolase/adducin family protein	QTL96728.1	223	PFAM Class II aldolase adducin	95.516	223	10	0	1	223	1	223	4.01e-161	441
AZO93791.1	476	rhamnulokinase	QTL96729.1	476	Psort location Cytoplasmic, score	92.632	475	35	0	1	475	1	475	0	918
AZO93792.1	424	L-rhamnose isomerase	QTL96730.1	423	L-rhamnose isomerase activity	94.326	423	24	0	2	424	1	423	0	811
AZO93793.1	107	L-rhamnose mutarotase	QTL96731.1	107	L-rhamnose mutarotase	92.523	107	8	0	1	107	1	107	4.4e-70	201
AZO93794.1	502	sugar ABC transporter ATP-binding protein	QTL96732.1	505	import. Responsible for energy coupling to the transport system	93.426	502	33	0	1	502	1	502	0	965
AZO93795.1	335	ABC transporter permease	QTL96733.1	335	Belongs to the binding-protein-dependent transport system permease family	98.806	335	4	0	1	335	1	335	0	649
AZO93796.1	328	ABC transporter permease	QTL96734.1	328	Belongs to the binding-protein-dependent transport system permease family	98.476	328	5	0	1	328	1	328	0	636
AZO93797.1	332	rhamnose ABC transporter substrate-binding protein	QTL96735.1	332	Periplasmic binding protein domain	98.494	332	5	0	1	332	1	332	0	659
AZO93798.1	330	LacI family transcriptional regulator	QTL96736.1	330	Transcriptional regulator	99.394	330	2	0	1	330	1	330	0	664
AZO93799.1	498	sugar ABC transporter ATP-binding protein	QTL96737.1	498	Part of the ABC transporter complex RbsABC involved in ribose import. Responsible for energy coupling to the transport system	98.795	498	6	0	1	498	1	498	0	993
AZO93800.1	325	ABC transporter permease	QTL96738.1	325	Belongs to the binding-protein-dependent transport system permease family	100	325	0	0	1	325	1	325	0	627
AZO93801.1	313	BMP family ABC transporter substrate-binding protein	QTL96739.1	313	Periplasmic binding protein domain	100	313	0	0	1	313	1	313	0	632
AZO93802.1	143	L-fucose mutarotase	QTL96740.1	143	Belongs to the RbsD FucU family	96.503	143	5	0	1	143	1	143	5.49e-100	280
AZO93803.1	284	MurR/RpiR family transcriptional regulator	QTL96741.1	284	Helix-turn-helix domain, rpiR family	99.296	284	2	0	1	284	1	284	0	560
AZO93804.1	474	PTS glucose transporter subunit IIB	QTL96743.1	474	phosphotransferase system, EIIB	97.679	474	11	0	1	474	1	474	0	907
AZO93805.1	305	N-acetylmuramic acid 6-phosphate etherase	QTL96744.1	304	Specifically catalyzes the cleavage of the D-lactyl ether substituent of MurNAc 6-phosphate, producing GlcNAc 6- phosphate and D-lactate	97.36	303	8	0	1	303	1	303	0	590
AZO93806.1	376	polysaccharide pyruvyl transferase family protein	QTL96745.1	376	hypothetical protein GM661_01525	97.34	376	10	0	1	376	1	376	0	749
AZO93807.1	197	hypothetical protein D7D81_03930	QTL96746.1	197	hypothetical protein GM661_01530	100	197	0	0	1	197	1	197	7.9e-143	392
AZO93808.1	728	glycosyltransferase	QTL96747.1	698	glycosyl transferase family 2	97.851	698	15	0	31	728	1	698	0	1387
AZO93809.1	660	glycosyltransferase	QTL96748.1	660	Glycosyl transferase family 2	98.636	660	9	0	1	660	1	660	0	1332
AZO93810.1	404	glycosyltransferase	QTL96749.1	405	Evidence 5 No homology to any previously reported sequences	97.531	405	9	1	1	404	1	405	0	812
AZO93811.1	753	glycosyltransferase	QTL96750.1	753	Methyltransferase domain	97.211	753	21	0	1	753	1	753	0	1508
AZO93812.1	258	hypothetical protein D7D81_03955	QTL96751.1	258	hypothetical protein GM661_01555	95.349	258	12	0	1	258	1	258	0	504
AZO93813.1	328	ABC transporter permease	QTL96753.1	330	Belongs to the binding-protein-dependent transport system permease family	98.78	328	4	0	1	328	1	328	0	620
AZO93814.1	308	sugar ABC transporter substrate-binding protein	QTL96754.1	308	Periplasmic binding protein domain	100	308	0	0	1	308	1	308	0	628
AZO93815.1	314	1,4-dihydroxy-2-naphthoate polyprenyltransferase	QTL96755.1	312	PFAM UbiA prenyltransferase	99.679	312	1	0	1	312	1	312	0	604
AZO93816.1	282	SCP-like extracellular protein	QTL96756.1	282	Bacterial SH3 domain homologues	100	282	0	0	1	282	1	282	0	581
AZO93817.1	364	tRNA 2-thiouridine(34) synthase MnmA	QTL96757.1	364	Catalyzes the 2-thiolation of uridine at the wobble position (U34) of tRNA, leading to the formation of s(2)U34	98.352	364	6	0	1	364	1	364	0	741
AZO93818.1	230	DNA-binding response regulator	QTL96758.1	230	Two component transcriptional regulator, winged helix family	99.565	230	1	0	1	230	1	230	3.7e-165	452
AZO93819.1	458	HAMP domain-containing protein	QTL96759.1	458	histidine kinase HAMP region domain protein	100	458	0	0	1	458	1	458	0	923
AZO93820.1	436	aminotransferase class V-fold PLP-dependent enzyme	QTL96760.1	436	Catalyzes the removal of elemental sulfur and selenium atoms from L-cysteine, L-cystine, L-selenocysteine, and L- selenocystine to produce L-alanine	100	436	0	0	1	436	1	436	0	899
AZO93821.1	251	nickel pincer cofactor biosynthesis protein LarB	QTL96761.1	251	(AIR) carboxylase	100	251	0	0	1	251	1	251	0	507
AZO93822.1	699	sodium-translocating pyrophosphatase	QTL96762.1	699	pump that utilizes the energy of pyrophosphate hydrolysis as the driving force for	99.571	699	3	0	1	699	1	699	0	1375
AZO93823.1	329	ABC transporter substrate-binding protein	QTL96763.1	329	PFAM ABC transporter substrate binding protein	99.696	329	1	0	1	329	1	329	0	646
AZO93824.1	307	ABC transporter permease	QTL96764.1	307	PFAM Branched-chain amino acid transport system permease component	96.417	307	11	0	1	307	1	307	0	572
AZO93825.1	265	ATP-binding cassette domain-containing protein	QTL96765.1	265	PFAM ABC transporter	93.585	265	17	0	1	265	1	265	1.3e-173	476
AZO93826.1	681	DNA helicase UvrD	QTL96766.1	678	PFAM UvrD REP helicase	97.046	677	20	0	1	677	1	677	0	1354
AZO93827.1	386	ROK family transcriptional regulator	QTL96767.1	386	ROK family	100	386	0	0	1	386	1	386	0	782
AZO93828.1	500	xylulokinase	QTL96768.1	500	FGGY family of carbohydrate kinases, C-terminal domain	99.8	500	1	0	1	500	1	500	0	1027
AZO93829.1	439	xylose isomerase	QTL96769.1	439	Belongs to the xylose isomerase family	99.544	439	2	0	1	439	1	439	0	905
AZO93830.1	316	sugar kinase	QTL96770.1	316	Belongs to the carbohydrate kinase PfkB family	100	316	0	0	1	316	1	316	0	645
AZO93831.1	300	hypothetical protein D7D81_04065	QTL96771.1	300	Psort location Cytoplasmic, score	100	300	0	0	1	300	1	300	0	615
AZO93832.1	203	molecular chaperone DnaJ	QTL96772.1	203	molecular chaperone DnaJ	100	203	0	0	1	203	1	203	7.5e-153	418
AZO93833.1	187	hypothetical protein D7D81_04075	QTL96773.1	178	Psort location CytoplasmicMembrane, score	100	178	0	0	10	187	1	178	1.04e-123	343
AZO93834.1	89	flagellar biosynthesis protein FlhB	QTL96774.1	89	FlhB HrpN YscU SpaS Family	100	89	0	0	1	89	1	89	6.38e-62	179
AZO93835.1	522	flagellar hook-length control protein FliK	QTL96775.1	522	hypothetical protein GM661_01690	99.234	522	4	0	1	522	1	522	0	1014
AZO93836.1	217	phosphate transport system regulatory protein PhoU	QTL96776.1	217	Plays a role in the regulation of phosphate uptake	100	217	0	0	1	217	1	217	2.8e-158	433
AZO93837.1	123	XRE family transcriptional regulator	QTL96777.1	123	transcriptional regulator, XRE family	99.187	123	1	0	1	123	1	123	6.53e-86	243
AZO93838.1	76	XRE family transcriptional regulator	QTL96778.1	76	Helix-turn-helix XRE-family like proteins	100	76	0	0	1	76	1	76	2.43e-53	157
AZO93839.1	288	carbohydrate ABC transporter permease	QTL96780.1	288	Binding-protein-dependent transport system inner membrane component	100	288	0	0	1	288	1	288	0	564
AZO93840.1	545	alpha-glucosidase	QTL96781.1	545	SMART alpha amylase, catalytic sub domain	99.817	545	1	0	1	545	1	545	0	1117
AZO93841.1	526	AAA family ATPase	QTL96782.1	526	PFAM Archaeal ATPase	99.81	526	1	0	1	526	1	526	0	1068
AZO93842.1	378	acyl-CoA dehydrogenase	QTL96783.1	378	PFAM Acyl-CoA dehydrogenase	99.735	378	1	0	1	378	1	378	0	776
AZO93843.1	262	electron transfer flavoprotein subunit beta/FixA family protein	QTL96784.1	262	electron transfer flavoprotein	100	262	0	0	1	262	1	262	0	522
AZO93844.1	404	4Fe-4S dicluster domain-containing protein	QTL96785.1	404	electron transfer flavoprotein, alpha subunit	99.752	404	1	0	1	404	1	404	0	823
AZO93845.1	238	hypothetical protein D7D81_04145	QTL96786.1	238	hypothetical protein GM661_01750	99.58	238	1	0	1	238	1	238	1.14e-177	484
AZO93846.1	246	glycosyltransferase family 2 protein	QTL96787.1	246	glycosyl transferase family 2	100	246	0	0	1	246	1	246	0	511
AZO93847.1	323	hypothetical protein D7D81_04155	QTL96788.1	323	glycosyltransferase	99.69	323	1	0	1	323	1	323	0	670
AZO93848.1	237	glycosyltransferase family 2 protein	QTL96789.1	237	glycosyl transferase family 2	100	237	0	0	1	237	1	237	6.37e-178	484
AZO93849.1	284	glycosyltransferase family 2 protein	QTL96790.1	284	Glycosyltransferase like family 2	100	284	0	0	1	284	1	284	0	586
AZO93850.1	237	phosphatase	QTL96791.1	237	PFAM PHP domain	100	237	0	0	1	237	1	237	3.3e-177	483
AZO93851.1	98	competence protein ComFB	QTL96792.1	98	PFAM Late competence development protein ComFB	100	98	0	0	1	98	1	98	5.9e-71	203
AZO93852.1	148	Lrp/AsnC family transcriptional regulator	QTL96793.1	148	Transcriptional regulator	100	148	0	0	1	148	1	148	7.28e-108	300
AZO93853.1	671	methyl-accepting chemotaxis protein	QTL96794.1	671	Methyl-accepting chemotaxis protein (MCP) signaling domain	99.851	671	1	0	1	671	1	671	0	1320
AZO93854.1	118	XRE family transcriptional regulator	QTL96795.1	118	Helix-turn-helix XRE-family like proteins	100	118	0	0	1	118	1	118	7.44e-83	234
AZO93855.1	186	hypothetical protein D7D81_04200	QTL96796.1	186	hypothetical protein GM661_01805	95.699	186	8	0	1	186	1	186	1.76e-132	365
AZO93856.1	357	alanine/ornithine racemase family PLP-dependent enzyme	QTL96797.1	357	PFAM Alanine racemase, N-terminal domain	99.157	356	3	0	1	356	1	356	0	709
AZO93857.1	544	amidohydrolase	QTL96798.1	544	Amidohydrolase family	98.713	544	7	0	1	544	1	544	0	1113
AZO93858.1	57	small, acid-soluble spore protein, alpha/beta type	QTL96799.1	57	Small, acid-soluble spore proteins, alpha/beta type	100	57	0	0	1	57	1	57	1.69e-38	118
AZO93859.1	166	HD domain-containing protein	QTL96800.1	166	mRNA catabolic process	97.59	166	4	0	1	166	1	166	6.68e-118	327
AZO93860.1	91	hypothetical protein D7D81_04230	QTL96801.1	91	hypothetical protein GM661_01835	100	91	0	0	1	91	1	91	3.65e-62	180
AZO93861.1	475	glucose-6-phosphate isomerase	QTL96802.1	475	Belongs to the GPI family	99.789	475	1	0	1	475	1	475	0	982
AZO93862.1	473	hypothetical protein D7D81_04240	QTL96803.1	473	hypothetical protein GM661_01845	99.366	473	3	0	1	473	1	473	0	961
AZO93863.1	178	ECF transporter S component	QTL96804.1	178	Psort location CytoplasmicMembrane, score	98.315	178	3	0	1	178	1	178	1.48e-118	330
AZO93864.1	233	class I SAM-dependent methyltransferase	QTL96805.1	233	Methyltransferase type 11	99.142	233	2	0	1	233	1	233	6.5e-177	482
AZO93865.1	256	tRNA 2-thiocytidine biosynthesis protein TtcA	QTL96806.1	257	Belongs to the TtcA family	93.75	256	16	0	1	256	1	256	0	496
AZO93866.1	334	LacI family transcriptional regulator	QTM00095.1	332	Psort location Cytoplasmic, score	34.663	326	212	1	10	334	1	326	1.03e-63	202
AZO93867.1	309	ribokinase	QTL97281.1	301	Catalyzes the phosphorylation of ribose at O-5 in a reaction requiring ATP and magnesium. The resulting D-ribose-5- phosphate can then be used either for sythesis of nucleotides, histidine, and tryptophan, or as a component of the pentose phosphate pathway	33.333	303	197	4	1	303	1	298	1.14e-49	164
AZO93868.1	132	D-ribose pyranase	QTL97914.1	178	Catalyzes the interconversion of beta-pyran and beta- furan forms of D-ribose	35.115	131	83	2	1	130	1	130	3.91e-21	80.9
AZO93869.1	503	sugar ABC transporter ATP-binding protein	QTM00093.1	488	Part of the ABC transporter complex RbsABC involved in ribose import. Responsible for energy coupling to the transport system	50.513	487	238	3	10	496	1	484	1.26e-163	469
AZO93870.1	328	ribose ABC transporter permease	QTL99707.1	326	Branched-chain amino acid transport system / permease component	53.793	290	130	3	22	308	34	322	1.3e-90	270
AZO93871.1	313	D-ribose ABC transporter substrate-binding protein	QTL99215.1	301	ABC-type sugar transport system periplasmic component	37.459	307	186	2	1	307	1	301	3.48e-71	219
AZO93872.1	199	TetR/AcrR family transcriptional regulator	QTL96807.1	199	Bacterial regulatory proteins, tetR family	98.492	199	3	0	1	199	1	199	6.79e-141	388
AZO93873.1	443	TolC family protein	QTL96808.1	443	hypothetical protein GM661_01870	98.646	443	6	0	1	443	1	443	0	878
AZO93874.1	504	efflux RND transporter periplasmic adaptor subunit	QTL96809.1	504	Belongs to the membrane fusion protein (MFP) (TC 8.A.1) family	98.611	504	7	0	1	504	1	504	0	988
AZO93875.1	1026	efflux RND transporter permease subunit	QTL96810.1	1026	Belongs to the resistance-nodulation-cell division (RND) (TC 2.A.6) family	99.318	1026	7	0	1	1026	1	1026	0	2022
AZO93876.1	312	cobalamin-binding protein	QTL96811.1	312	PFAM periplasmic binding protein	95.833	312	13	0	1	312	1	312	0	548
AZO93877.1	156	HutP	QTL96812.1	156	PFAM HutP	100	156	0	0	1	156	1	156	4.08e-112	311
AZO93878.1	218	DUF374 domain-containing protein	QTL96813.1	218	protein conserved in bacteria	98.165	218	4	0	1	218	1	218	2.93e-159	436
AZO93879.1	378	tetraacyldisaccharide 4'-kinase	QTL96814.1	378	Transfers the gamma-phosphate of ATP to the 4'-position of a tetraacyldisaccharide 1-phosphate intermediate (termed DS-1- P) to form tetraacyldisaccharide 1,4'-bis-phosphate (lipid IVA)	97.884	378	8	0	1	378	1	378	0	745
AZO93880.1	242	3-deoxy-manno-octulosonate cytidylyltransferase	QTL96815.1	242	Activates KDO (a required 8-carbon sugar) for incorporation into bacterial lipopolysaccharide in Gram-negative bacteria	98.347	242	4	0	1	242	1	242	6.83e-177	482
AZO93881.1	279	3-deoxy-8-phosphooctulonate synthase	QTL96816.1	279	PFAM DAHP synthetase I	98.925	279	3	0	1	279	1	279	0	565
AZO93882.1	287	lipid A biosynthesis acyltransferase	QTL96817.1	288	PFAM Bacterial lipid A biosynthesis acyltransferase	93.38	287	19	0	1	287	1	287	0	546
AZO93883.1	340	glycosyltransferase family 9 protein	QTL96819.1	340	PFAM Glycosyltransferase family 9 (heptosyltransferase)	96.471	340	12	0	1	340	1	340	0	682
AZO93884.1	246	glycosyltransferase family 2 protein	QTL96820.1	246	PFAM Glycosyl transferase family 2	91.463	246	21	0	1	246	1	246	4.69e-171	468
AZO93885.1	369	glycosyltransferase	QTL96821.1	369	PFAM glycosyl transferase group 1	97.019	369	11	0	1	369	1	369	0	726
AZO93886.1	314	NAD-dependent epimerase/dehydratase family protein	QTL96822.1	314	NAD(P)H-binding	94.268	314	18	0	1	314	1	314	0	586
AZO93887.1	253	FMN-binding protein	QTL96823.1	253	FMN_bind	97.628	253	6	0	1	253	1	253	0	502
AZO93888.1	370	HD-GYP domain-containing protein	QTL96824.1	370	HD domain	98.378	370	6	0	1	370	1	370	0	747
AZO93889.1	64	hypothetical protein D7D81_04395	QTL96825.1	64	hypothetical protein GM661_01965	96.875	64	2	0	1	64	1	64	3.13e-43	130
AZO93891.1	495	glutamate--tRNA ligase	QTL96826.1	490	Catalyzes the attachment of glutamate to tRNA(Glu) in a two-step reaction glutamate is first activated by ATP to form Glu-AMP and then transferred to the acceptor end of tRNA(Glu)	97.755	490	11	0	1	490	1	490	0	990
AZO93892.1	277	ATP-binding protein	QTL96827.1	277	Binds and transfers iron-sulfur (Fe-S) clusters to target apoproteins. Can hydrolyze ATP	100	277	0	0	1	277	1	277	0	556
AZO93893.1	134	DUF134 domain-containing protein	QTL96828.1	134	Belongs to the UPF0251 family	99.254	134	1	0	1	134	1	134	2.3e-98	275
AZO93894.1	171	TlpA family protein disulfide reductase	QTL96829.1	171	alkyl hydroperoxide reductase Thiol specific antioxidant Mal allergen	96.491	171	6	0	1	171	1	171	2.32e-124	343
AZO93895.1	219	cytochrome c biogenesis protein CcdA	QTL96830.1	219	PFAM Cytochrome C biogenesis protein transmembrane region	97.717	219	5	0	1	219	1	219	3.69e-149	410
AZO93896.1	574	adenylate/guanylate cyclase domain-containing protein	QTL96831.1	574	PFAM Adenylate and Guanylate cyclase catalytic domain	99.652	574	2	0	1	574	1	574	0	1156
AZO93897.1	298	hypothetical protein D7D81_04440	QTL96832.1	298	hypothetical protein GM661_02005	98.993	298	3	0	1	298	1	298	0	570
AZO93898.1	216	Crp/Fnr family transcriptional regulator	QTL96833.1	216	PFAM Bacterial regulatory proteins, crp family	99.074	216	2	0	1	216	1	216	4.1e-154	422
AZO93899.1	105	thioredoxin	QTL96834.1	105	Belongs to the thioredoxin family	100	105	0	0	1	105	1	105	2.85e-75	214
AZO93900.1	241	ATP-binding cassette domain-containing protein	QTL96835.1	241	TIGRFAM FeS assembly ATPase SufC	100	241	0	0	1	241	1	241	6.36e-180	490
AZO93901.1	316	hypothetical protein D7D81_04465	QTL96836.1	316	SufBD protein	99.684	316	1	0	1	316	1	316	0	639
AZO93902.1	132	flavodoxin family protein	QTL96837.1	132	FMN binding	100	132	0	0	1	132	1	132	9.49e-95	266
AZO93903.1	140	DUF1934 domain-containing protein	QTL96838.1	140	DUF1934 family protein	98.571	140	2	0	1	140	1	140	4.18e-101	282
AZO93904.1	537	CTP synthase	QTL96839.1	537	Catalyzes the ATP-dependent amination of UTP to CTP with either L-glutamine or ammonia as the source of nitrogen. Regulates intracellular CTP levels through interactions with the four ribonucleotide triphosphates	100	537	0	0	1	537	1	537	0	1101
AZO93905.1	57	aspartyl-phosphate phosphatase Spo0E family protein	QTL96840.1	57	Spo0E family sporulation regulatory protein-aspartic acid phosphatase	100	57	0	0	1	57	1	57	4.05e-37	114
AZO93906.1	101	hypothetical protein D7D81_04490	QTL96841.1	235	Haloacid dehalogenase-like hydrolase	95.96	99	4	0	1	99	1	99	3.15e-65	193
AZO93907.1	146	HAD family hydrolase	QTL96841.1	235	Haloacid dehalogenase-like hydrolase	94.928	138	7	0	9	146	98	235	1.97e-99	282
AZO93908.1	167	hypothetical protein D7D81_04500	QTL96842.1	167	hypothetical protein GM661_02060	94.012	167	10	0	1	167	1	167	1.74e-107	301
AZO93909.1	214	hypothetical protein D7D81_04505	QTL96843.1	214	hypothetical protein GM661_02065	99.065	214	2	0	1	214	1	214	1.48e-160	439
AZO93910.1	284	class II fructose-1,6-bisphosphate aldolase	QTL96844.1	284	fructose-1,6-bisphosphate aldolase, class II, various bacterial and amitochondriate protist	98.592	284	4	0	1	284	1	284	0	572
AZO93911.1	428	transcription termination factor Rho	QTL96845.1	417	Facilitates transcription termination by a mechanism that involves Rho binding to the nascent RNA, activation of Rho's RNA-dependent ATPase activity, and release of the mRNA from the DNA template	99.76	417	1	0	12	428	1	417	0	842
AZO93912.1	314	ABC transporter permease	QTL96753.1	330	Belongs to the binding-protein-dependent transport system permease family	50.161	311	154	1	2	311	3	313	2.68e-89	267
AZO93913.1	310	sugar ABC transporter substrate-binding protein	QTL99215.1	301	ABC-type sugar transport system periplasmic component	34.323	303	186	6	11	310	5	297	1.02e-47	159
AZO93914.1	260	DeoR/GlpR transcriptional regulator	QTL96727.1	252	COG1349 Transcriptional regulators of sugar metabolism	33.906	233	150	2	3	235	5	233	1.24e-35	124
AZO93915.1	493	sugar ABC transporter ATP-binding protein	QTL98178.1	495	Part of the ABC transporter complex RbsABC involved in ribose import. Responsible for energy coupling to the transport system	42.008	488	283	0	5	492	4	491	3.31e-132	389
AZO93915.1	493	sugar ABC transporter ATP-binding protein	QTL98178.1	495	Part of the ABC transporter complex RbsABC involved in ribose import. Responsible for energy coupling to the transport system	25.926	243	168	5	5	240	256	493	8.15e-13	67
AZO93916.1	625	hypothetical protein D7D81_04550	QTL96846.1	625	Patatin-like phospholipase	96	625	23	1	1	625	3	625	0	1210
AZO93917.1	260	IclR family transcriptional regulator	QTL96847.1	260	helix-turn-helix domain-containing protein	96.538	260	9	0	1	260	1	260	0	513
AZO93918.1	320	tripartite tricarboxylate transporter substrate binding protein	QTL97330.1	337	Tripartite tricarboxylate transporter family receptor	26.49	302	205	7	4	295	2	296	1.55e-26	103
AZO93920.1	497	C4-dicarboxylate ABC transporter permease	QTL97332.1	506	Tripartite tricarboxylate transporter TctA family	41.83	459	263	2	25	482	28	483	3.18e-123	367
AZO93921.1	294	4-hydroxy-tetrahydrodipicolinate synthase	QTL96852.1	294	Catalyzes the condensation of (S)-aspartate-beta- semialdehyde (S)-ASA and pyruvate to 4-hydroxy- tetrahydrodipicolinate (HTPA)	96.599	294	10	0	1	294	1	294	0	564
AZO93922.1	297	2-hydroxy-3-oxopropionate reductase	QTL97306.1	296	NAD binding domain	98.299	294	5	0	3	296	2	295	0	576
AZO93923.1	447	glucarate dehydratase	QTL96854.1	447	Mandelate racemase / muconate lactonizing enzyme, C-terminal domain	98.434	447	7	0	1	447	1	447	0	915
AZO93924.1	82	YkuS family protein	QTL96855.1	82	Uncharacterised protein family (UPF0180)	98.78	82	1	0	1	82	1	82	5.41e-56	164
AZO93925.1	309	nitronate monooxygenase	QTL96856.1	309	PFAM 2-nitropropane dioxygenase	99.676	309	1	0	1	309	1	309	0	615
AZO93929.1	381	glycosyltransferase family 1 protein	QTL97043.1	426	Glycosyl transferases group 1	26.361	349	226	11	1	328	1	339	1.35e-25	103
AZO93931.1	370	glycosyltransferase family 1 protein	QTL96821.1	369	PFAM glycosyl transferase group 1	42.033	364	201	5	5	364	4	361	9.06e-94	281
AZO93932.1	69	50S ribosomal protein L31	QTL96857.1	69	Binds the 23S rRNA	100	69	0	0	1	69	1	69	3.91e-49	145
AZO93933.1	294	DUF1385 domain-containing protein	QTL96858.1	294	Protein of unknown function (DUF1385)	99.32	294	2	0	1	294	1	294	0	590
AZO93934.1	284	peptide chain release factor N(5)-glutamine methyltransferase	QTL96860.1	284	Methylates the class 1 translation termination release factors RF1 PrfA and RF2 PrfB on the glutamine residue of the universally conserved GGQ motif	98.239	284	5	0	1	284	1	284	0	555
AZO93935.1	359	threonylcarbamoyl-AMP synthase	QTL96861.1	359	Required for the formation of a threonylcarbamoyl group on adenosine at position 37 (t(6)A37) in tRNAs that read codons beginning with adenine	99.443	359	2	0	1	359	1	359	0	721
AZO93936.1	205	manganese efflux pump	QTL96862.1	205	Putative manganese efflux pump	99.512	205	1	0	1	205	1	205	9.82e-142	390
AZO93937.1	209	uracil phosphoribosyltransferase	QTL96863.1	209	Catalyzes the conversion of uracil and 5-phospho-alpha- D-ribose 1-diphosphate (PRPP) to UMP and diphosphate	100	209	0	0	1	209	1	209	3.8e-153	419
AZO93938.1	352	undecaprenyl/decaprenyl-phosphate alpha-N-acetylglucosaminyl 1-phosphate transferase	QTL96864.1	352	PFAM Glycosyl transferase family 4	99.716	352	1	0	1	352	1	352	0	687
AZO93939.1	80	AtpZ/AtpI family protein	QTL96865.1	80	Putative F0F1-ATPase subunit Ca2+/Mg2+ transporter	97.5	80	2	0	1	80	1	80	3.01e-51	152
AZO93940.1	221	ATP synthase F0 subunit A	QTL96866.1	221	it plays a direct role in the translocation of protons across the membrane	99.548	221	1	0	1	221	1	221	4.03e-158	433
AZO93941.1	86	ATP synthase F0 subunit C	QTL96867.1	86	ATP hydrolysis coupled proton transport	98.837	86	1	0	1	86	1	86	2.12e-54	160
AZO93942.1	85	ATP synthase F0 subunit C	QTL96868.1	85	F(1)F(0) ATP synthase produces ATP from ADP in the presence of a proton or sodium gradient. F-type ATPases consist of two structural domains, F(1) containing the extramembraneous catalytic core and F(0) containing the membrane proton channel, linked together by a central stalk and a peripheral stalk. During catalysis, ATP synthesis in the catalytic domain of F(1) is coupled via a rotary mechanism…	100	85	0	0	1	85	1	85	1.11e-55	163
AZO93943.1	166	ATP synthase F0 subunit B	QTL96869.1	166	Component of the F(0) channel, it forms part of the peripheral stalk, linking F(1) to F(0)	99.398	166	1	0	1	166	1	166	3.05e-114	318
AZO93944.1	186	F0F1 ATP synthase subunit delta	QTL96870.1	186	F(1)F(0) ATP synthase produces ATP from ADP in the presence of a proton or sodium gradient. F-type ATPases consist of two structural domains, F(1) containing the extramembraneous catalytic core and F(0) containing the membrane proton channel, linked together by a central stalk and a peripheral stalk. During catalysis, ATP synthesis in the catalytic domain of F(1) is coupled via a rotary mechanism…	96.237	186	7	0	1	186	1	186	1.75e-127	353
AZO93945.1	529	F0F1 ATP synthase subunit alpha	QTL96871.1	529	Produces ATP from ADP in the presence of a proton gradient across the membrane. The alpha chain is a regulatory subunit	98.11	529	10	0	1	529	1	529	0	1036
AZO93946.1	288	ATP synthase F1 subunit gamma	QTL96872.1	288	Produces ATP from ADP in the presence of a proton gradient across the membrane. The gamma chain is believed to be important in regulating ATPase activity and the flow of protons through the CF(0) complex	98.958	288	3	0	1	288	1	288	0	585
AZO93947.1	483	F0F1 ATP synthase subunit beta	QTL96873.1	483	Produces ATP from ADP in the presence of a proton gradient across the membrane. The catalytic sites are hosted primarily by the beta subunits	99.793	483	1	0	1	483	1	483	0	975
AZO93948.1	137	F0F1 ATP synthase subunit epsilon	QTL96874.1	137	Produces ATP from ADP in the presence of a proton gradient across the membrane	99.27	137	1	0	1	137	1	137	3.37e-97	272
AZO93949.1	184	DUF1694 domain-containing protein	QTL96875.1	184	Protein of unknown function (DUF1694)	98.913	184	2	0	1	184	1	184	2.95e-131	362
AZO93950.1	415	UDP-N-acetylglucosamine 1-carboxyvinyltransferase	QTL96876.1	415	Cell wall formation. Adds enolpyruvyl to UDP-N- acetylglucosamine	100	415	0	0	1	415	1	415	0	835
AZO93951.1	317	stage II sporulation protein D	QTL96877.1	317	PFAM Stage II sporulation protein	98.107	317	6	0	1	317	1	317	0	649
AZO93952.1	275	M23 family metallopeptidase	QTL96878.1	275	Membrane proteins related to metalloendopeptidases	98.909	275	3	0	1	275	1	275	0	555
AZO93953.1	559	carbon starvation protein A	QTL96879.1	559	carbon starvation protein CstA	98.927	559	6	0	1	559	1	559	0	1097
AZO93954.1	111	sporulation transcriptional regulator SpoIIID	QTL96880.1	111	TIGRFAM sporulation transcriptional regulator SpoIIID	100	111	0	0	1	111	1	111	8.56e-79	224
AZO93955.1	342	rod shape-determining protein	QTL96881.1	342	TIGRFAM cell shape determining protein, MreB Mrl family	99.708	342	1	0	1	342	1	342	0	674
AZO93956.1	619	hypothetical protein D7D81_04775	QTL96882.1	581	PFAM SpoIVB peptidase S55	98.107	581	11	0	1	581	1	581	0	1143
AZO93957.1	1388	hypothetical protein D7D81_04780	QTL96883.1	1387	hypothetical protein GM661_02280	97.262	1388	37	1	1	1388	1	1387	0	2680
AZO93958.1	198	sigma-70 family RNA polymerase sigma factor	QTL96884.1	198	sigma factors are initiation factors that promote the attachment of RNA polymerase to specific initiation sites and are then released	99.495	198	1	0	1	198	1	198	4.59e-146	401
AZO93959.1	122	hypothetical protein D7D81_04790	QTL96885.1	126	hypothetical protein GM661_02290	97.541	122	3	0	1	122	5	126	3.28e-86	243
AZO93960.1	569	outer membrane assembly protein	QTL96886.1	569	PFAM Surface antigen variable number repeat	98.594	569	8	0	1	569	1	569	0	1132
AZO93961.1	174	OmpH family outer membrane protein	QTL96887.1	174	PFAM Outer membrane	99.425	174	1	0	1	174	1	174	2.55e-124	344
AZO93962.1	320	hypothetical protein D7D81_04805	QTL96888.1	320	hypothetical protein GM661_02305	98.125	320	6	0	1	320	1	320	0	602
AZO93963.1	147	OmpH family outer membrane protein	QTL96889.1	147	hypothetical protein GM661_02310	99.32	147	1	0	1	147	1	147	1.17e-101	284
AZO93964.1	346	UDP-3-O-(3-hydroxymyristoyl)glucosamine N-acyltransferase	QTL96890.1	346	Catalyzes the N-acylation of UDP-3-O-acylglucosamine using 3-hydroxyacyl-ACP as the acyl donor. Is involved in the biosynthesis of lipid A, a phosphorylated glycolipid that anchors the lipopolysaccharide to the outer membrane of the cell	98.844	346	4	0	1	346	1	346	0	680
AZO93965.1	202	hypothetical protein D7D81_04820	QTL96891.1	202	hypothetical protein GM661_02320	98.515	202	3	0	1	202	1	202	4.8e-145	399
AZO93966.1	790	hypothetical protein D7D81_04825	QTL96892.1	782	nuclear chromosome segregation	99.872	782	1	0	9	790	1	782	0	1556
AZO93967.1	243	amino acid ABC transporter ATP-binding protein	QTL96893.1	243	PFAM ABC transporter	99.177	243	2	0	1	243	1	243	1.64e-179	489
AZO93968.1	142	3-hydroxyacyl-[acyl-carrier-protein] dehydratase FabZ	QTL96895.1	142	Involved in unsaturated fatty acids biosynthesis. Catalyzes the dehydration of short chain beta-hydroxyacyl-ACPs and long chain saturated and unsaturated beta-hydroxyacyl-ACPs	100	142	0	0	1	142	1	142	1.22e-102	286
AZO93969.1	271	LpxI family protein	QTL96896.1	270	protein conserved in bacteria	99.631	271	0	1	1	271	1	270	0	529
AZO93970.1	378	lipid-A-disaccharide synthase	QTL96897.1	378	Condensation of UDP-2,3-diacylglucosamine and 2,3- diacylglucosamine-1-phosphate to form lipid A disaccharide, a precursor of lipid A, a phosphorylated glycolipid that anchors the lipopolysaccharide to the outer membrane of the cell	99.471	378	2	0	1	378	1	378	0	765
AZO93971.1	202	LPS export ABC transporter periplasmic protein LptC	QTL96898.1	210	LPS export ABC transporter periplasmic protein LptC	91.5	200	17	0	3	202	11	210	2.54e-136	377
AZO93972.1	212	hypothetical protein D7D81_04865	QTL96899.1	212	hypothetical protein GM661_02365	99.057	212	2	0	1	212	1	212	2.43e-152	418
AZO93973.1	239	LPS export ABC transporter ATP-binding protein	QTL96900.1	239	PFAM ABC transporter	99.163	239	2	0	1	239	1	239	8.97e-177	482
AZO93974.1	363	YjgP/YjgQ family permease	QTL96901.1	363	Permease YjgP YjgQ family	99.449	363	2	0	1	363	1	363	0	728
AZO93975.1	426	DUF3084 domain-containing protein	QTL96902.1	426	Protein of unknown function (DUF3084)	99.531	426	2	0	1	426	1	426	0	847
AZO93976.1	131	pre-16S rRNA-processing nuclease YqgF	QTL96903.1	131	Resolvase RNase H domain protein fold	96.947	131	4	0	1	131	1	131	1.26e-91	258
AZO93977.1	602	S-layer homology domain-containing protein	QTL96904.1	602	PFAM S-layer domain-containing protein	99.834	602	1	0	1	602	1	602	0	1186
AZO93978.1	305	hypothetical protein D7D81_04895	QTL96905.1	305	hypothetical protein GM661_02395	99.016	305	3	0	1	305	1	305	0	627
AZO93979.1	372	hypothetical protein D7D81_04900	QTL96906.1	372	hypothetical protein GM661_02400	99.194	372	3	0	1	372	1	372	0	726
AZO93980.1	303	hypothetical protein D7D81_04905	QTL96907.1	303	hypothetical protein GM661_02405	99.01	303	3	0	1	303	1	303	0	595
AZO93981.1	562	LPS-assembly protein LptD	QTL96908.1	563	hypothetical protein GM661_02410	95.737	563	23	1	1	562	1	563	0	1070
AZO93982.1	227	hypothetical protein D7D81_04915	QTL96909.1	227	hypothetical protein GM661_02415	98.238	227	4	0	1	227	1	227	7.59e-160	438
AZO93983.1	289	UTP--glucose-1-phosphate uridylyltransferase	QTL96910.1	289	PFAM Nucleotidyl transferase	100	289	0	0	1	289	1	289	0	583
AZO93984.1	281	dTDP-4-dehydrorhamnose reductase	QTL96911.1	281	Catalyzes the reduction of dTDP-6-deoxy-L-lyxo-4- hexulose to yield dTDP-L-rhamnose	96.441	281	10	0	1	281	1	281	0	563
AZO93985.1	364	hypothetical protein D7D81_04940	QTL96912.1	364	hypothetical protein GM661_02440	97.527	364	9	0	1	364	1	364	0	701
AZO93986.1	72	hypothetical protein D7D81_04945	QTL96913.1	72	hypothetical protein GM661_02445	100	72	0	0	1	72	1	72	8.98e-48	142
AZO93987.1	542	radical SAM protein	QTL96914.1	542	PFAM Radical SAM	98.893	542	6	0	1	542	1	542	0	1098
AZO93988.1	248	hypothetical protein D7D81_04955	QTL96915.1	247	hypothetical protein GM661_02455	97.571	247	6	0	1	247	1	247	1.42e-179	489
AZO93989.1	462	aspartate aminotransferase family protein	QTL96920.1	462	PFAM aminotransferase class-III	99.567	462	2	0	1	462	1	462	0	944
AZO93990.1	386	glycosyltransferase family 4 protein	QTL96921.1	386	Glycosyl transferases group 1	98.964	386	4	0	1	386	1	386	0	788
AZO93993.1	143	flagellar protein	QTL96922.1	143	TIGRFAM flagellar operon protein	100	143	0	0	1	143	1	143	1.9e-104	291
AZO93994.1	90	flagellar biosynthesis anti-sigma factor FlgM	QTL96923.1	90	flagellar biosynthesis anti-sigma factor FlgM	100	90	0	0	1	90	1	90	2.62e-61	178
AZO93995.1	166	flagellar protein FlgN	QTL96924.1	166	FlgN protein	86.747	166	22	0	1	166	1	166	2.47e-91	260
AZO93996.1	138	flagellar export chaperone FliS	QTL96925.1	138	flagellar protein flis	95.652	138	6	0	1	138	1	138	9.26e-96	269
AZO93997.1	160	hypothetical protein D7D81_05000	QTL96926.1	160	hypothetical protein GM661_02510	77.5	160	36	0	1	160	1	160	2.8e-77	224
AZO93998.1	151	flagellar protein FlgN	QTL96927.1	151	hypothetical protein GM661_02520	78.808	151	32	0	1	151	1	151	3.58e-78	225
AZO93999.1	591	flagellar hook-associated protein FlgK	QTL96928.1	592	TIGRFAM Flagellar hook-associated protein, FlgK	87.5	592	73	1	1	591	1	592	0	1025
AZO94000.1	299	flagellar hook-associated protein 3	QTL96929.1	299	Belongs to the bacterial flagellin family	85.906	298	42	0	1	298	1	298	0	520
AZO94001.1	197	hypothetical protein D7D81_05025	QTL96930.1	197	hypothetical protein GM661_02535	79.695	197	40	0	1	197	1	197	5.69e-116	325
AZO94002.1	148	flagellar assembly protein FliW	QTL96931.1	148	Binds to the C-terminal region of flagellin, which is implicated in polymerization, and participates in the assembly of the flagellum	86.486	148	20	0	1	148	1	148	4.52e-93	263
AZO94003.1	85	carbon storage regulator	QTL96932.1	85	Could accelerate the degradation of some genes transcripts potentially through selective RNA binding	95.294	85	4	0	1	85	1	85	3.24e-41	127
AZO94004.1	276	flagellin	QTL96933.1	276	Flagellin is the subunit protein which polymerizes to form the filaments of bacterial flagella	88.768	276	31	0	1	276	1	276	2.7e-175	481
AZO94005.1	543	hypothetical protein D7D81_05045	QTL96934.1	548	Flagellar hook-associated protein 2 N-terminus	87.203	547	66	2	1	543	1	547	0	930
AZO94006.1	268	flagellin	QTL96935.1	273	Flagellin is the subunit protein which polymerizes to form the filaments of bacterial flagella	76.277	274	58	3	1	268	1	273	2.61e-145	405
AZO94007.1	613	DUF115 domain-containing protein	QTL96936.1	614	DUF115 domain-containing protein	75.204	613	151	1	1	612	1	613	0	927
AZO94008.1	192	hypothetical protein D7D81_05060	QTL96937.1	194	hypothetical protein GM661_02570	73.711	194	49	1	1	192	1	194	6.49e-100	284
AZO94009.1	322	UDP-N-acetylglucosamine 4,6-dehydratase (inverting)	QTL99897.1	322	Polysaccharide biosynthesis protein	83.54	322	53	0	1	322	1	322	0	578
AZO94010.1	389	UDP-4-amino-4,6-dideoxy-N-acetyl-beta-L-altrosamine transaminase	QTL96948.1	391	Belongs to the DegT DnrJ EryC1 family	60.309	388	147	3	1	384	6	390	2.48e-166	468
AZO94012.1	475	hypothetical protein D7D81_05080	QTL99726.1	493	hypothetical protein GM661_18085	33.333	417	248	12	68	467	81	484	1.83e-51	178
AZO94013.1	233	acylneuraminate cytidylyltransferase family protein	QTL97711.1	230	Cytidylyltransferase	43.111	225	124	3	7	229	4	226	2.99e-61	189
AZO94015.1	354	N-acetylneuraminate synthase	QTL99733.1	332	N-acetylneuraminate synthase	50.613	326	161	0	21	346	5	330	8.22e-109	318
AZO94016.1	208	acetyltransferase	QTL99736.1	212	hypothetical protein GM661_18135	32.161	199	129	3	1	198	1	194	1.54e-22	87.8
AZO94018.1	330	NAD-dependent epimerase/dehydratase family protein	QTL97708.1	326	NAD-dependent epimerase dehydratase	27.914	326	214	5	1	320	1	311	4.82e-31	116
AZO94019.1	431	nucleotide sugar dehydrogenase	QTL97696.1	436	Belongs to the UDP-glucose GDP-mannose dehydrogenase family	25.564	399	262	12	6	385	14	396	4.09e-27	109
AZO94020.1	367	DegT/DnrJ/EryC1/StrS family aminotransferase	QTL97709.1	395	DegT/DnrJ/EryC1/StrS aminotransferase family	40.369	379	203	4	1	358	1	377	1.07e-94	285
AZO94022.1	201	N-acetyltransferase	QTL97694.1	246	Bacterial transferase hexapeptide (six repeats)	36.364	198	118	2	2	191	36	233	7.09e-36	123
AZO94026.1	227	HAD family hydrolase	QTL98608.1	237	phosphatase activity	30.542	203	107	7	4	185	1	190	1.17e-18	78.6
AZO94027.1	349	pseudaminic acid synthase	QTL96939.1	335	synthase	47.977	346	164	4	2	346	1	331	2.84e-108	317
AZO94028.1	260	3-deoxy-manno-octulosonate cytidylyltransferase	QTL96940.1	581	Cytidylyltransferase	31.174	247	157	7	16	259	9	245	3.61e-28	109
AZO94029.1	350	UDP-2,4-diacetamido-2,4,6-trideoxy-beta-L-altropyranose hydrolase	QTL99725.1	552	Cytidylyltransferase	29.412	323	204	8	3	324	225	524	1.79e-34	129
AZO94030.1	64	hypothetical protein D7D81_05180	QTL96949.1	64	hypothetical protein GM661_02635	98.438	64	1	0	1	64	1	64	3.44e-41	125
AZO94031.1	414	GGDEF domain-containing protein	QTL96950.1	414	diguanylate cyclase	99.275	414	3	0	1	414	1	414	0	821
AZO94032.1	118	response regulator	QTL96951.1	118	PFAM Response regulator receiver domain	100	118	0	0	1	118	1	118	1.09e-82	234
AZO94033.1	162	flagellar basal body rod protein FlgB	QTL96952.1	139	Structural component of flagellum, the bacterial motility apparatus. Part of the rod structure of flagellar basal body	97.842	139	3	0	24	162	1	139	7.92e-98	275
AZO94034.1	145	flagellar basal body rod protein FlgC	QTL96953.1	145	Belongs to the flagella basal body rod proteins family	99.31	145	1	0	1	145	1	145	2.08e-106	296
AZO94035.1	100	flagellar hook-basal body complex protein FliE	QTL96954.1	100	PFAM flagellar hook-basal body complex protein FliE	98	100	2	0	1	100	1	100	1.04e-67	195
AZO94036.1	524	flagellar M-ring protein FliF	QTL96955.1	524	The M ring may be actively involved in energy transduction	99.618	524	2	0	1	524	1	524	0	1060
AZO94037.1	335	flagellar motor switch protein FliG	QTL96956.1	335	TIGRFAM flagellar motor switch protein FliG	100	335	0	0	1	335	1	335	0	676
AZO94038.1	260	hypothetical protein D7D81_05220	QTL96957.1	259	Flagellar biosynthesis type III secretory pathway protein	97.308	260	6	1	1	260	1	259	7.13e-178	486
AZO94039.1	436	flagellar protein export ATPase FliI	QTL96958.1	436	PFAM ATP synthase alpha beta family, beta-barrel domain	100	436	0	0	1	436	1	436	0	876
AZO94040.1	150	flagellar export protein FliJ	QTL96959.1	150	TIGRFAM flagellar export protein FliJ	97.333	150	4	0	1	150	1	150	1.99e-102	286
AZO94041.1	176	hypothetical protein D7D81_05235	QTL96960.1	176	hypothetical protein GM661_02690	97.159	176	5	0	1	176	1	176	2.09e-119	332
AZO94042.1	510	hypothetical protein D7D81_05240	QTL96961.1	509	Flagellar hook-length control protein FliK	92.941	510	35	1	1	510	1	509	0	937
AZO94043.1	149	flagellar hook capping protein	QTL96962.1	155	PFAM flagellar hook capping protein	96.429	140	5	0	1	140	1	140	1.13e-99	280
AZO94044.1	130	flagellar protein	QTL96963.1	130	TIGRFAM flagellar operon protein	96.923	130	4	0	1	130	1	130	8.35e-91	256
AZO94045.1	536	flagellar hook protein FlgE	QTL96964.1	525	flagellar hook protein FlgE, epsilon proteobacterial	88.827	537	47	4	1	536	1	525	0	883
AZO94046.1	67	flagellar protein FlbD	QTL96965.1	67	Flagellar protein (FlbD)	100	67	0	0	1	67	1	67	3.85e-43	130
AZO94047.1	267	motility protein A	QTL96966.1	267	PFAM MotA TolQ ExbB proton channel family	99.625	267	1	0	1	267	1	267	0	520
AZO94048.1	244	flagellar motor protein MotB	QTL96967.1	244	PFAM OmpA family	99.18	244	2	0	1	244	1	244	0	497
AZO94049.1	145	flagellar basal body-associated protein FliL	QTL96968.1	145	Controls the rotational direction of flagella during chemotaxis	98.621	145	2	0	1	145	1	145	2.26e-102	286
AZO94050.1	335	flagellar motor switch protein FliM	QTL96969.1	335	TIGRFAM flagellar motor switch protein FliM	99.701	335	1	0	1	335	1	335	0	681
AZO94051.1	392	flagellar motor switch phosphatase FliY	QTL99898.1	392	PFAM surface presentation of antigens (SPOA)	100	392	0	0	1	392	1	392	0	786
AZO94052.1	115	flagellar biosynthetic protein FliO	QTL96970.1	115	flagellar	99.13	115	1	0	1	115	1	115	8.51e-81	229
AZO94053.1	255	flagellar biosynthetic protein FliP	QTL96971.1	255	Plays a role in the flagellum-specific transport system	100	255	0	0	1	255	1	255	0	502
AZO94054.1	89	flagellar biosynthetic protein FliQ	QTL96972.1	89	Role in flagellar biosynthesis	100	89	0	0	1	89	1	89	8.03e-59	171
AZO94055.1	261	flagellar type III secretion system protein FliR	QTL96973.1	261	Role in flagellar biosynthesis	99.234	261	2	0	1	261	1	261	0	504
AZO94056.1	355	flagellar biosynthesis protein FlhB	QTL96974.1	355	Required for formation of the rod structure in the basal body of the flagellar apparatus. Together with FliI and FliH, may constitute the export apparatus of flagellin	99.437	355	2	0	1	355	1	355	0	715
AZO94057.1	355	flagellar biosynthesis protein FlhF	QTL96975.1	355	PFAM SRP54-type protein, GTPase domain	99.718	355	1	0	1	355	1	355	0	715
AZO94058.1	287	MinD/ParA family protein	QTL96976.1	287	PFAM CobQ CobB MinD ParA nucleotide binding domain	99.303	287	2	0	1	287	1	287	0	572
AZO94059.1	221	hypothetical protein D7D81_05330	QTL96977.1	221	type IV pilus assembly PilZ	98.643	221	3	0	1	221	1	221	9.83e-163	445
AZO94060.1	108	hypothetical protein D7D81_05335	QTL96978.1	108	hypothetical protein GM661_02790	95.37	108	5	0	1	108	1	108	1.4e-58	172
AZO94061.1	255	FliA/WhiG family RNA polymerase sigma factor	QTL96979.1	255	RNA polymerase sigma factor, FliA WhiG family	99.216	255	2	0	1	255	1	255	0	507
AZO94062.1	612	DUF342 domain-containing protein	QTL96980.1	612	polymerase, contains PALM domain, HD hydrolase domain and Zn-ribbon domain	98.856	612	7	0	1	612	1	612	0	1208
AZO94063.1	104	hypothetical protein D7D81_05350	QTL96981.1	104	hypothetical protein GM661_02805	100	104	0	0	1	104	1	104	4.64e-71	204
AZO94064.1	169	hypothetical protein D7D81_05355	QTL96982.1	169	hypothetical protein GM661_02810	98.225	169	3	0	1	169	1	169	4.49e-118	328
AZO94065.1	195	hypothetical protein D7D81_05360	QTL96983.1	195	Functions as a peptidoglycan terminase that cleaves nascent peptidoglycan strands endolytically to terminate their elongation	99.487	195	1	0	1	195	1	195	2.6e-139	384
AZO94066.1	249	flagellar basal-body rod protein FlgF	QTL96984.1	249	Flagella basal body rod protein	98.394	249	4	0	1	249	1	249	5.48e-180	491
AZO94067.1	263	flagellar basal-body rod protein FlgG	QTL96985.1	263	flagellar basal-body rod protein FlgG, Gram-negative bacteria	98.479	263	4	0	1	263	1	263	0	527
AZO94068.1	326	flagella basal body P-ring formation protein FlgA	QTL96986.1	326	flagellar basal body P-ring formation protein FlgA	97.239	326	9	0	1	326	1	326	0	629
AZO94069.1	194	flagellar basal body L-ring protein FlgH	QTL96987.1	194	Assembles around the rod to form the L-ring and probably protects the motor basal body from shearing forces during rotation	97.423	194	5	0	1	194	1	194	1.78e-137	379
AZO94070.1	377	flagellar basal body P-ring protein FlgI	QTL96988.1	377	Assembles around the rod to form the L-ring and probably protects the motor basal body from shearing forces during rotation	99.204	377	3	0	1	377	1	377	0	746
AZO94071.1	108	hypothetical protein D7D81_05390	QTL96989.1	108	Rod binding protein	100	108	0	0	1	108	1	108	3.22e-78	222
AZO94072.1	664	hypothetical protein D7D81_05395	QTL96990.1	664	hypothetical protein GM661_02850	98.645	664	9	0	1	664	1	664	0	1332
AZO94073.1	178	hypothetical protein D7D81_05400	QTL96991.1	178	hypothetical protein GM661_02855	97.753	178	4	0	1	178	1	178	1.07e-125	348
AZO94074.1	326	carbohydrate kinase	QTL96992.1	326	TIGRFAM rfaE bifunctional protein, domain I	98.773	326	4	0	1	326	1	326	0	645
AZO94075.1	159	D-glycero-beta-D-manno-heptose 1-phosphate adenylyltransferase	QTL96993.1	159	Catalyzes the ADP transfer from ATP to D-glycero-beta-D- manno-heptose 1-phosphate, yielding ADP-D-glycero-beta-D-manno- heptose	100	159	0	0	1	159	1	159	2.36e-115	320
AZO94076.1	207	sigma-70 family RNA polymerase sigma factor	QTL96994.1	207	TIGRFAM RNA polymerase sigma factor, sigma-70 family	99.517	207	1	0	1	207	1	207	3.27e-151	414
AZO94077.1	243	ComF family protein	QTL96995.1	243	TIGRFAM comF family protein	97.942	243	5	0	1	243	1	243	1.4e-179	489
AZO94078.1	67	cold shock domain-containing protein	QTL96996.1	67	Cold shock protein	100	67	0	0	1	67	1	67	1.82e-44	134
AZO94079.1	192	ribosome-associated translation inhibitor RaiA	QTL96997.1	186	Required for dimerization of active 70S ribosomes into 100S ribosomes in stationary phase	96.354	192	1	1	1	192	1	186	8e-133	367
AZO94080.1	446	NADP-specific glutamate dehydrogenase	QTL96998.1	446	Belongs to the Glu Leu Phe Val dehydrogenases family	97.982	446	9	0	1	446	1	446	0	897
AZO94081.1	850	preprotein translocase subunit SecA	QTL96999.1	850	Part of the Sec protein translocase complex. Interacts with the SecYEG preprotein conducting channel. Has a central role in coupling the hydrolysis of ATP to the transfer of proteins into and across the cell membrane, serving as an ATP-driven molecular motor driving the stepwise translocation of polypeptide chains across the membrane	99.529	850	4	0	1	850	1	850	0	1732
AZO94082.1	371	peptide chain release factor 2	QTL97000.1	350	Peptide chain release factor 2 directs the termination of translation in response to the peptide chain termination codons UGA and UAA	98.563	348	5	0	24	371	3	350	0	703
AZO94083.1	222	DUF2993 domain-containing protein	QTL97001.1	222	DUF2993 domain-containing protein	97.297	222	6	0	1	222	1	222	2.39e-155	426
AZO94084.1	647	hypothetical protein D7D81_05460	QTL97002.1	647	Psort location CytoplasmicMembrane, score 10.00	99.227	647	5	0	1	647	1	647	0	1266
AZO94085.1	370	polysaccharide pyruvyl transferase CsaB	QTL97003.1	370	TIGRFAM polysaccharide pyruvyl transferase CsaB	98.645	369	5	0	1	369	1	369	0	726
AZO94086.1	253	glycosyltransferase	QTL97004.1	253	Catalyzes the conversion of GlcNAc-PP-undecaprenol into ManNAc-GlcNAc-PP-undecaprenol, the first committed lipid intermediate in the de novo synthesis of teichoic acid	98.024	253	5	0	1	253	1	253	0	499
AZO94087.1	284	YitT family protein	QTL99901.1	278	BCR, YitT family COG1284	98.921	278	3	0	7	284	1	278	0	534
AZO94088.1	212	ATP-binding cassette domain-containing protein	QTL97005.1	212	Cell division ATP-binding protein ftsE	99.528	212	1	0	1	212	1	212	2.91e-156	428
AZO94089.1	206	hypothetical protein D7D81_05485	QTL97006.1	206	hypothetical protein GM661_02940	97.087	206	6	0	1	206	1	206	5.82e-139	384
AZO94090.1	386	S41 family peptidase	QTL97007.1	386	Belongs to the peptidase S41A family	99.223	386	3	0	1	386	1	386	0	771
AZO94091.1	203	hypothetical protein D7D81_05500	QTL97008.1	203	PFAM Accessory gene regulator B	98.03	203	4	0	1	203	1	203	1.05e-143	395
AZO94092.1	32	cyclic lactone autoinducer peptide	QTL97009.1	32	cyclic lactone autoinducer peptide	84.375	32	5	0	1	32	1	32	7.87e-16	59.3
AZO94093.1	457	GHKL domain-containing protein	QTL97010.1	457	PFAM Histidine kinase-, DNA gyrase B-, and HSP90-like ATPase	92.123	457	36	0	1	457	1	457	0	820
AZO94094.1	243	DNA-binding response regulator	QTL97011.1	238	LytTr DNA-binding domain	98.739	238	3	0	6	243	1	238	3.64e-175	478
AZO94095.1	112	P-II family nitrogen regulator	QTL97012.1	112	Belongs to the P(II) protein family	100	112	0	0	1	112	1	112	6.19e-76	216
AZO94096.1	139	peptidoglycan endopeptidase	QTL97013.1	139	NlpC/P60 family	100	139	0	0	1	139	1	139	1.43e-101	283
AZO94097.1	356	hypothetical protein D7D81_05535	QTL97014.1	355	hypothetical protein GM661_02990	62.429	354	132	1	1	354	1	353	7.81e-137	390
AZO94098.1	206	hypothetical protein D7D81_05540	QTL97015.1	201	hypothetical protein GM661_02995	72.414	203	47	4	11	206	1	201	9.02e-96	274
AZO94099.1	389	hypothetical protein D7D81_05545	QTL97014.1	355	hypothetical protein GM661_02990	65.738	359	113	5	31	387	3	353	4.82e-145	412
AZO94100.1	1062	hypothetical protein D7D81_05550	QTL97018.1	1069	hypothetical protein GM661_03010	89.302	1075	90	8	5	1062	3	1069	0	1926
AZO94101.1	1123	hypothetical protein D7D81_05555	QTL97019.1	1122	Rhs element vgr protein	95.904	1123	45	1	1	1123	1	1122	0	2169
AZO94102.1	672	excinuclease ABC subunit UvrB	QTL97027.1	672	damaged site, the DNA wraps around one UvrB monomer. DNA wrap is dependent on ATP binding by UvrB and probably causes local melting of the DNA helix, facilitating insertion of UvrB beta-hairpin between the DNA strands. Then UvrB probes one DNA strand for the presence of a lesion. If a lesion is found the UvrA subunits dissociate and the UvrB-DNA preincision complex is formed. This complex is subs…	99.256	672	5	0	1	672	1	672	0	1359
AZO94103.1	948	excinuclease ABC subunit UvrA	QTL97028.1	948	The UvrABC repair system catalyzes the recognition and processing of DNA lesions. UvrA is an ATPase and a DNA-binding protein. A damage recognition complex composed of 2 UvrA and 2 UvrB subunits scans DNA for abnormalities. When the presence of a lesion has been verified by UvrB, the UvrA molecules dissociate	99.684	948	3	0	1	948	1	948	0	1927
AZO94104.1	609	excinuclease ABC subunit UvrC	QTL97029.1	609	The UvrABC repair system catalyzes the recognition and processing of DNA lesions. UvrC both incises the 5' and 3' sides of the lesion. The N-terminal half is responsible for the 3' incision and the C-terminal half is responsible for the 5' incision	98.851	609	7	0	1	609	1	609	0	1231
AZO94105.1	102	PTS sugar transporter subunit IIB	QTL99262.1	100	PFAM Phosphotransferase system, lactose cellobiose-specific IIB subunit	31.633	98	67	0	5	102	3	100	5.66e-15	61.6
AZO94106.1	403	PTS sugar transporter subunit IIC	QTL99261.1	440	The phosphoenolpyruvate-dependent sugar phosphotransferase system (PTS), a major carbohydrate active - transport system, catalyzes the phosphorylation of incoming sugar substrates concomitant with their translocation across the cell membrane	24.88	418	280	13	10	397	10	423	4.61e-20	88.2
AZO94108.1	305	EamA family transporter	QTL99968.1	301	EamA-like transporter family	22.222	297	206	6	1	286	1	283	2.83e-11	59.7
AZO94110.1	553	phosphoenolpyruvate--protein phosphotransferase	QTL97650.1	572	General (non sugar-specific) component of the phosphoenolpyruvate-dependent sugar phosphotransferase system (sugar PTS). This major carbohydrate active-transport system catalyzes the phosphorylation of incoming sugar substrates concomitantly with their translocation across the cell membrane. Enzyme I transfers the phosphoryl group from phosphoenolpyruvate (PEP) to the phosphoryl carrier protein (…	42.987	549	302	4	6	545	3	549	5.54e-157	457
AZO94111.1	85	HPr family phosphocarrier protein	QTL99844.1	89	TIGRFAM Phosphotransferase System HPr (HPr) Family	45.679	81	44	0	1	81	1	81	1.44e-23	82.8
AZO94112.1	266	HAD family phosphatase	QTL97030.1	266	TIGRFAM Cof subfamily of IIB subfamily of haloacid dehalogenase superfamily	97.744	266	6	0	1	266	1	266	0	530
AZO94113.1	56	4Fe-4S dicluster domain-containing protein	QTL97031.1	56	4Fe-4S binding domain	100	56	0	0	1	56	1	56	2.17e-34	107
AZO94114.1	313	L-lactate dehydrogenase	QTL97032.1	313	Belongs to the LDH MDH superfamily. LDH family	100	313	0	0	1	313	1	313	0	638
AZO94115.1	408	serine hydroxymethyltransferase	QTL97033.1	408	Catalyzes the reversible interconversion of serine and glycine with tetrahydrofolate (THF) serving as the one-carbon carrier. This reaction serves as the major source of one-carbon groups required for the biosynthesis of purines, thymidylate, methionine, and other important biomolecules. Also exhibits THF- independent aldolase activity toward beta-hydroxyamino acids, producing glycine and aldehyd…	99.755	408	1	0	1	408	1	408	0	836
AZO94116.1	220	hypothetical protein D7D81_05635	QTL97034.1	220	hypothetical protein GM661_03095	99.091	220	2	0	1	220	1	220	1.63e-152	419
AZO94117.1	323	ROK family protein	QTL97035.1	323	TIGRFAM ROK family protein	99.071	323	3	0	1	323	1	323	0	639
AZO94118.1	307	HPr(Ser) kinase/phosphatase	QTL97036.1	307	Catalyzes the ATP- as well as the pyrophosphate- dependent phosphorylation of a specific serine residue in HPr, a phosphocarrier protein of the phosphoenolpyruvate-dependent sugar phosphotransferase system (PTS). HprK P also catalyzes the pyrophosphate-producing, inorganic phosphate-dependent dephosphorylation (phosphorolysis) of seryl-phosphorylated HPr (P- Ser-HPr). The two antagonistic activit…	99.674	307	1	0	1	307	1	307	0	615
AZO94119.1	132	hypothetical protein D7D81_05650	QTL97037.1	303	C-terminal binding-module, SLH-like, of glucodextranase	89.744	117	12	0	1	117	1	117	1.76e-59	182
AZO94120.1	55	hypothetical protein D7D81_05655	QTL97037.1	303	C-terminal binding-module, SLH-like, of glucodextranase	96.364	55	2	0	1	55	249	303	5.51e-32	108
AZO94121.1	104	carbohydrate-binding protein	QTL97038.1	104	PFAM Carbohydrate binding domain (family 25)	100	104	0	0	1	104	1	104	2.36e-76	217
AZO94122.1	114	hypothetical protein D7D81_05670	QTL97039.1	114	Evidence 4 Homologs of previously reported genes of	99.123	114	1	0	1	114	1	114	2.59e-80	228
AZO94123.1	416	diaminopimelate decarboxylase	QTL97040.1	416	Specifically catalyzes the decarboxylation of meso- diaminopimelate (meso-DAP) to L-lysine	98.317	416	7	0	1	416	1	416	0	829
AZO94124.1	234	DUF4912 domain-containing protein	QTL97041.1	234	Domain of unknown function (DUF4912)	97.863	234	5	0	1	234	1	234	9e-173	471
AZO94125.1	537	DUF1957 domain-containing protein	QTL97042.1	537	Glycosyl hydrolase family 57	98.138	537	10	0	1	537	1	537	0	1099
AZO94126.1	426	glycosyltransferase family 1 protein	QTL97043.1	426	Glycosyl transferases group 1	98.592	426	6	0	1	426	1	426	0	875
AZO94127.1	822	nucleotidyltransferase	QTL97044.1	822	Phosphoglucomutase phosphomannomutase alpha beta alpha domain I	99.027	822	8	0	1	822	1	822	0	1676
AZO94128.1	327	squalene/phytoene synthase family protein	QTL97045.1	327	PFAM Squalene phytoene synthase	98.777	327	4	0	1	327	1	327	0	653
AZO94129.1	261	hypothetical protein D7D81_05705	QTL97046.1	261	hypothetical protein GM661_03160	100	261	0	0	1	261	1	261	0	508
AZO94130.1	255	PHP domain-containing protein	QTL97047.1	255	DNA polymerase alpha chain like domain	98.824	255	3	0	1	255	1	255	0	519
AZO94131.1	283	RNase adapter RapZ	QTL97048.1	283	Displays ATPase and GTPase activities	100	283	0	0	1	283	1	283	0	578
AZO94132.1	419	YvcK family protein	QTL97049.1	419	Required for morphogenesis under gluconeogenic growth conditions	98.807	419	5	0	1	419	1	419	0	833
AZO94133.1	309	DNA-binding protein WhiA	QTL97050.1	309	May be required for sporulation	99.676	309	1	0	1	309	1	309	0	621
AZO94134.1	430	RNA polymerase sigma-54 factor	QTL97051.1	430	TIGRFAM RNA polymerase sigma-54 factor	98.372	430	7	0	1	430	1	430	0	859
AZO94135.1	336	LacI family transcriptional regulator	QTL97052.1	336	helix_turn _helix lactose operon repressor	99.405	336	2	0	1	336	1	336	0	675
AZO94136.1	153	RpiB/LacA/LacB family sugar-phosphate isomerase	QTL97053.1	153	Ribose/Galactose Isomerase	99.346	153	1	0	1	153	1	153	1.23e-113	315
AZO94137.1	351	autoinducer 2 ABC transporter substrate-binding protein	QTL97054.1	351	Periplasmic binding protein domain	99.715	351	1	0	1	351	1	351	0	718
AZO94138.1	493	sugar ABC transporter ATP-binding protein	QTL97055.1	493	ATPases associated with a variety of cellular activities	99.189	493	4	0	1	493	1	493	0	988
AZO94139.1	352	ABC transporter permease	QTL97056.1	352	Branched-chain amino acid transport system / permease component	99.716	352	1	0	1	352	1	352	0	688
AZO94140.1	332	ABC transporter permease	QTL97057.1	332	Branched-chain amino acid transport system / permease component	100	332	0	0	1	332	1	332	0	646
AZO94141.1	317	ribokinase	QTL97058.1	317	Catalyzes the phosphorylation of ribose at O-5 in a reaction requiring ATP and magnesium. The resulting D-ribose-5- phosphate can then be used either for sythesis of nucleotides, histidine, and tryptophan, or as a component of the pentose phosphate pathway	99.369	317	2	0	1	317	1	317	0	642
AZO94142.1	223	ribulose-phosphate 3-epimerase	QTL97059.1	223	PFAM Ribulose-phosphate 3-epimerase	99.552	223	1	0	1	223	1	223	1.34e-166	455
AZO94143.1	210	3-hexulose-6-phosphate synthase	QTL97060.1	210	3-hexulose-6-phosphate synthase	100	209	0	0	1	209	1	209	8.39e-152	416
AZO94144.1	189	SIS domain-containing protein	QTL97061.1	189	sugar phosphate isomerase involved in capsule formation	99.471	189	1	0	1	189	1	189	1.23e-140	386
AZO94145.1	343	sugar-binding transcriptional regulator	QTL97062.1	343	Transcriptional regulator, DeoR family	99.708	343	1	0	1	343	1	343	0	682
AZO94146.1	337	type I glyceraldehyde-3-phosphate dehydrogenase	QTL97063.1	337	Belongs to the glyceraldehyde-3-phosphate dehydrogenase family	97.626	337	8	0	1	337	1	337	0	676
AZO94147.1	394	phosphoglycerate kinase	QTL97064.1	394	Belongs to the phosphoglycerate kinase family	98.731	394	5	0	1	394	1	394	0	777
AZO94148.1	250	triose-phosphate isomerase	QTL97065.1	250	Involved in the gluconeogenesis. Catalyzes stereospecifically the conversion of dihydroxyacetone phosphate (DHAP) to D-glyceraldehyde-3-phosphate (G3P)	100	250	0	0	1	250	1	250	0	504
AZO94149.1	513	2,3-bisphosphoglycerate-independent phosphoglycerate mutase	QTL97066.1	513	Catalyzes the interconversion of 2-phosphoglycerate and 3-phosphoglycerate	99.025	513	5	0	1	513	1	513	0	1040
AZO94150.1	428	phosphopyruvate hydratase	QTL97067.1	428	Catalyzes the reversible conversion of 2- phosphoglycerate into phosphoenolpyruvate. It is essential for the degradation of carbohydrates via glycolysis	99.533	428	2	0	1	428	1	428	0	857
AZO94151.1	87	hypothetical protein D7D81_05825	QTL97068.1	87	hypothetical protein GM661_03280	98.851	87	1	0	1	87	1	87	2.98e-56	165
AZO94152.1	151	hypothetical protein D7D81_05830	QTL97069.1	153	hypothetical protein GM661_03285	96	150	6	0	1	150	1	150	4.82e-99	278
AZO94153.1	306	LysM peptidoglycan-binding domain-containing protein	QTL97070.1	306	Belongs to the 5'-nucleotidase family	98.693	306	4	0	1	306	1	306	0	591
AZO94154.1	594	PAS domain-containing protein	QTL97071.1	594	His Kinase A (phosphoacceptor) domain	99.832	594	1	0	1	594	1	594	0	1192
AZO94155.1	230	DNA-binding response regulator	QTL97072.1	230	Transcriptional regulatory protein, C terminal	99.565	230	1	0	1	230	1	230	3.71e-170	464
AZO94156.1	363	KamA family radical SAM protein	QTL97073.1	363	Lysine 2,3-aminomutase YodO family protein	97.245	363	10	0	1	363	1	363	0	730
AZO94157.1	72	preprotein translocase subunit SecG	QTL97074.1	72	PFAM Preprotein translocase SecG subunit	98.611	72	1	0	1	72	1	72	8.76e-43	130
AZO94158.1	127	PaaI family thioesterase	QTL97075.1	127	PFAM thioesterase superfamily	99.213	127	1	0	1	127	1	127	2.83e-92	259
AZO94159.1	183	HDIG domain-containing protein	QTL97076.1	183	PFAM metal-dependent phosphohydrolase HD sub domain	97.814	183	4	0	1	183	1	183	1.74e-131	363
AZO94160.1	707	ribonuclease R	QTL97077.1	707	3'-5' exoribonuclease that releases 5'-nucleoside monophosphates and is involved in maturation of structured RNAs	99.576	707	3	0	1	707	1	707	0	1437
AZO94161.1	156	SsrA-binding protein SmpB	QTL97078.1	156	Required for rescue of stalled ribosomes mediated by trans-translation. Binds to transfer-messenger RNA (tmRNA), required for stable association of tmRNA with ribosomes. tmRNA and SmpB together mimic tRNA shape, replacing the anticodon stem-loop with SmpB. tmRNA is encoded by the ssrA gene	100	156	0	0	1	156	1	156	2.03e-114	317
AZO94163.1	72	hypothetical protein D7D81_05890	QTL97079.1	72	hypothetical protein GM661_03345	97.222	72	2	0	1	72	1	72	2.19e-46	139
AZO94164.1	311	hypothetical protein D7D81_05895	QTL97080.1	311	peptidoglycan binding domain	96.785	311	10	0	1	311	1	311	0	609
AZO94165.1	76	ferredoxin	QTL97081.1	76	4Fe-4S single cluster domain of Ferredoxin I	100	76	0	0	1	76	1	76	1.83e-52	154
AZO94166.1	214	di-trans,poly-cis-decaprenylcistransferase	QTL97082.1	214	Putative undecaprenyl diphosphate synthase	98.598	214	3	0	1	214	1	214	5.04e-161	440
AZO94167.1	428	ATP-binding protein	QTL97083.1	428	Protein of unknown function (DUF815)	97.902	429	7	2	1	428	1	428	0	841
AZO94168.1	51	copper chaperone	QTL97084.1	49	hypothetical protein GM661_03370	96.078	51	0	1	1	51	1	49	8.62e-31	98.2
AZO94169.1	72	alpha/beta-type small acid-soluble spore protein	QTL97085.1	72	PFAM Small, acid-soluble spore proteins, alpha beta type	100	72	0	0	1	72	1	72	3.7e-50	148
AZO94170.1	100	hypothetical protein D7D81_05925	QTL97086.1	100	hypothetical protein GM661_03380	99	100	1	0	1	100	1	100	9.82e-71	202
AZO94171.1	85	hypothetical protein D7D81_05930	QTL97087.1	85	hypothetical protein GM661_03385	98.824	85	1	0	1	85	1	85	1.03e-55	163
AZO94173.1	190	manganese catalase family protein	QTL97088.1	190	PFAM Manganese containing catalase	97.895	190	4	0	1	190	1	190	4.15e-141	387
AZO94174.1	87	spore coat protein CotJB	QTL97089.1	87	CotJB protein	100	87	0	0	1	87	1	87	4.75e-61	177
AZO94175.1	59	spore coat associated protein CotJA	QTL97090.1	59	spore coat associated protein CotJA	100	59	0	0	1	59	1	59	2.92e-40	122
AZO94176.1	265	amino acid ABC transporter substrate-binding protein	QTL97091.1	265	Belongs to the bacterial solute-binding protein 3 family	99.245	265	2	0	1	265	1	265	0	523
AZO94177.1	213	amino acid ABC transporter permease	QTL97092.1	213	Abc transporter, permease protein	99.531	213	1	0	1	213	1	213	4.64e-152	417
AZO94178.1	238	amino acid ABC transporter ATP-binding protein	QTL99908.1	236	AAA domain, putative AbiEii toxin, Type IV TA system	98.729	236	3	0	3	238	1	236	2.71e-171	468
AZO94179.1	247	ZIP family metal transporter	QTL97093.1	247	PFAM zinc iron permease	98.381	247	4	0	1	247	1	247	6.17e-171	468
AZO94180.1	107	hypothetical protein D7D81_05975	QTL97094.1	109	hypothetical protein GM661_03425	95.413	109	3	1	1	107	1	109	3.47e-72	207
AZO94181.1	151	DUF327 family protein	QTL97095.1	151	Protein of unknown function (DUF327)	100	151	0	0	1	151	1	151	4.02e-106	296
AZO94182.1	563	ribonuclease J	QTL97096.1	563	An RNase that has 5'-3' exonuclease and possibly endonuclease activity. Involved in maturation of rRNA and in some organisms also mRNA maturation and or decay	98.401	563	9	0	1	563	1	563	0	1120
AZO94183.1	747	AMIN domain-containing protein	QTL97097.1	747	PFAM Copper amine oxidase N-terminal domain	98.394	747	12	0	1	747	1	747	0	1495
AZO94184.1	168	spore germination-like protein	QTL97098.1	168	Sporulation and spore germination	98.214	168	3	0	1	168	1	168	1.48e-119	331
AZO94185.1	245	ribonuclease PH	QTL97099.1	244	Phosphorolytic exoribonuclease that removes nucleotide residues following the -CCA terminus of tRNA and adds nucleotides to the ends of RNA molecules by using nucleoside diphosphates as substrates	100	244	0	0	1	244	1	244	0	498
AZO94186.1	206	XTP/dITP diphosphatase	QTL97100.1	205	Pyrophosphatase that catalyzes the hydrolysis of nucleoside triphosphates to their monophosphate derivatives, with a high preference for the non-canonical purine nucleotides XTP (xanthosine triphosphate), dITP (deoxyinosine triphosphate) and ITP. Seems to function as a house-cleaning enzyme that removes non-canonical purine nucleotides from the nucleotide pool, thus preventing their incorporation…	98.537	205	3	0	1	205	1	205	2.6e-149	410
AZO94187.1	92	hypothetical protein D7D81_06010	QTL97101.1	85	hypothetical protein GM661_03460	84.783	92	7	1	1	92	1	85	1.21e-49	148
AZO94188.1	194	DUF3298 domain-containing protein	QTL97103.1	194	Protein of unknown function (DUF3298)	97.938	194	4	0	1	194	1	194	1.97e-139	384
AZO94189.1	270	amino acid ABC transporter substrate-binding protein	QTL97104.1	270	PFAM Extracellular solute-binding protein, family 3	98.148	270	5	0	1	270	1	270	0	539
AZO94190.1	234	amino acid ABC transporter permease	QTL97105.1	234	TIGRFAM polar amino acid ABC transporter, inner membrane subunit	97.863	234	5	0	1	234	1	234	1.64e-168	461
AZO94191.1	215	amino acid ABC transporter permease	QTL97106.1	216	Binding-protein-dependent transport system inner membrane component	98.592	213	3	0	1	213	1	213	9.92e-151	414
AZO94193.1	312	hypothetical protein D7D81_06060	QTL97112.1	312	hypothetical protein GM661_03540	99.038	312	3	0	1	312	1	312	0	602
AZO94194.1	274	nitrogenase iron protein	QTL97113.1	274	The key enzymatic reactions in nitrogen fixation are catalyzed by the nitrogenase complex, which has 2 components the iron protein and the molybdenum-iron protein	100	274	0	0	1	274	1	274	0	556
AZO94195.1	108	P-II family nitrogen regulator	QTL97114.1	108	Belongs to the P(II) protein family	100	108	0	0	1	108	1	108	2.49e-73	209
AZO94196.1	127	P-II family nitrogen regulator	QTL97115.1	127	Belongs to the P(II) protein family	99.213	127	1	0	1	127	1	127	4.73e-88	248
AZO94197.1	538	nitrogenase molybdenum-iron protein alpha chain	QTL97116.1	538	nitrogenase component I, alpha chain	99.814	538	1	0	1	538	1	538	0	1116
AZO94198.1	455	nitrogenase molybdenum-iron protein subunit beta	QTL97117.1	455	This molybdenum-iron protein is part of the nitrogenase complex that catalyzes the key enzymatic reactions in nitrogen fixation	99.56	455	2	0	1	455	1	455	0	933
AZO94199.1	453	nitrogenase iron-molybdenum cofactor biosynthesis protein NifE	QTL97118.1	453	Belongs to the NifD NifK NifE NifN family	98.675	453	6	0	1	453	1	453	0	920
AZO94200.1	465	nitrogenase	QTL97119.1	465	Belongs to the NifD NifK NifE NifN family	98.71	465	6	0	1	465	1	465	0	945
AZO94201.1	293	nitrogenase cofactor biosynthesis protein NifB	QTL97120.1	292	Nitrogenase cofactor biosynthesis protein NifB	99.315	292	1	1	1	292	1	291	0	597
AZO94202.1	102	(2Fe-2S) ferredoxin domain-containing protein	QTL97121.1	102	PFAM Respiratory-chain NADH dehydrogenase 24 Kd subunit	100	102	0	0	1	102	1	102	2.74e-73	209
AZO94203.1	259	molybdate ABC transporter substrate-binding protein	QTL97122.1	259	ABC transporter, periplasmic molybdate-binding protein	96.139	259	10	0	1	259	1	259	5.27e-176	481
AZO94204.1	268	molybdate ABC transporter permease subunit	QTL97123.1	268	PFAM binding-protein-dependent transport systems inner membrane component	98.876	267	3	0	1	267	1	267	0	517
AZO94205.1	226	ATP-binding cassette domain-containing protein	QTL97124.1	226	ABC transporter	97.788	226	5	0	1	226	1	226	8.12e-167	456
AZO94206.1	352	homocitrate synthase	QTL97125.1	352	Belongs to the alpha-IPM synthase homocitrate synthase family	96.286	350	13	0	1	350	1	350	0	692
AZO94207.1	250	hypothetical protein D7D81_06130	QTL97126.1	253	Putative heavy-metal chelation	57.312	253	105	1	1	250	1	253	5.4e-112	319
AZO94208.1	231	GntR family transcriptional regulator	QTL97135.1	231	SMART regulatory protein GntR HTH	99.567	231	1	0	1	231	1	231	6.14e-171	466
AZO94209.1	215	peroxiredoxin	QTL97136.1	215	Thiol-specific peroxidase that catalyzes the reduction of hydrogen peroxide and organic hydroperoxides to water and alcohols, respectively. Plays a role in cell protection against oxidative stress by detoxifying peroxides	98.605	215	3	0	1	215	1	215	3.74e-162	443
AZO94212.1	899	pyridine nucleotide-disulfide oxidoreductase	QTM00047.1	1026	NDH-1 shuttles electrons from NADH, via FMN and iron- sulfur (Fe-S) centers, to quinones in the respiratory chain	38.923	483	269	9	353	824	554	1021	4.04e-92	310
AZO94214.1	141	rubrerythrin family protein	QTL97165.1	141	Psort location Cytoplasmic, score	99.286	140	1	0	1	140	1	140	7.22e-102	284
AZO94215.1	230	DNA-binding response regulator	QTL97166.1	230	Response regulator receiver	99.13	230	2	0	1	230	1	230	5.52e-169	461
AZO94216.1	463	sensor histidine kinase	QTL97167.1	463	Histidine kinase-, DNA gyrase B-, and HSP90-like ATPase	97.624	463	11	0	1	463	1	463	0	922
AZO94217.1	171	periplasmic heavy metal sensor	QTL97168.1	170	periplasmic heavy metal sensor	90.643	171	15	1	1	171	1	170	5.36e-100	282
AZO94218.1	433	phenylacetate--CoA ligase	QTL97169.1	433	Catalyzes the activation of phenylacetic acid (PA) to phenylacetyl-CoA (PA-CoA)	99.307	433	3	0	1	433	1	433	0	884
AZO94219.1	141	ACT domain-containing protein	QTL97170.1	141	ACT domain protein	100	141	0	0	1	141	1	141	1.21e-100	281
AZO94220.1	425	HD domain-containing protein	QTL97171.1	425	PFAM HD domain	98.824	425	5	0	1	425	1	425	0	867
AZO94221.1	225	hypothetical protein D7D81_06210	QTL97172.1	225	hypothetical protein GM661_03855	98.667	225	3	0	1	225	1	225	7.09e-162	443
AZO94222.1	266	hypothetical protein D7D81_06215	QTL97173.1	283	hypothetical protein GM661_03860	100	266	0	0	1	266	18	283	0	545
AZO94223.1	111	hypothetical protein D7D81_06220	QTL97174.1	111	hypothetical protein GM661_03865	98.198	111	2	0	1	111	1	111	4.37e-76	217
AZO94224.1	426	trigger factor	QTL97175.1	426	Involved in protein export. Acts as a chaperone by maintaining the newly synthesized protein in an open conformation. Functions as a peptidyl-prolyl cis-trans isomerase	99.765	426	1	0	1	426	1	426	0	839
AZO94225.1	198	ATP-dependent Clp endopeptidase proteolytic subunit ClpP	QTL97176.1	198	Cleaves peptides in various proteins in a process that requires ATP hydrolysis. Has a chymotrypsin-like activity. Plays a major role in the degradation of misfolded proteins	100	198	0	0	1	198	1	198	2.45e-147	404
AZO94226.1	416	ATP-dependent Clp protease ATP-binding subunit ClpX	QTL97177.1	416	ATP-dependent specificity component of the Clp protease. It directs the protease to specific substrates. Can perform chaperone functions in the absence of ClpP	100	416	0	0	1	416	1	416	0	839
AZO94227.1	558	ATP-dependent protease LonB	QTL97178.1	558	ATPase family associated with various cellular activities (AAA)	99.821	558	1	0	1	558	1	558	0	1134
AZO94228.1	786	endopeptidase La	QTL97179.1	786	ATP-dependent serine protease that mediates the selective degradation of mutant and abnormal proteins as well as certain short-lived regulatory proteins. Required for cellular homeostasis and for survival from DNA damage and developmental changes induced by stress. Degrades polypeptides processively to yield small peptide fragments that are 5 to 10 amino acids long. Binds to DNA in a double-stran…	98.728	786	10	0	1	786	1	786	0	1556
AZO94229.1	195	YihA family ribosome biogenesis GTP-binding protein	QTL97180.1	195	Necessary for normal cell division and for the maintenance of normal septation	99.487	195	1	0	1	195	1	195	5.78e-146	400
AZO94230.1	274	class I SAM-dependent methyltransferase	QTL97181.1	274	Methyltransferase	99.27	274	2	0	1	274	1	274	0	561
AZO94231.1	88	DUF2619 domain-containing protein	QTL97182.1	88	Protein of unknown function (DUF2619)	97.727	88	2	0	1	88	1	88	9.12e-55	161
AZO94232.1	588	DoxX family membrane protein	QTL97183.1	588	Pyridine nucleotide-disulphide oxidoreductase	98.98	588	6	0	1	588	1	588	0	1195
AZO94233.1	229	FMN-binding protein	QTL97184.1	229	FMN_bind	98.253	229	4	0	1	229	1	229	7.61e-167	456
AZO94234.1	348	FAD:protein FMN transferase	QTL97185.1	348	Flavin transferase that catalyzes the transfer of the FMN moiety of FAD and its covalent binding to the hydroxyl group of a threonine residue in a target flavoprotein	96.552	348	12	0	1	348	1	348	0	691
AZO94235.1	316	polyprenyl synthetase family protein	QTL97186.1	316	Belongs to the FPP GGPP synthase family	98.734	316	4	0	1	316	1	316	0	641
AZO94236.1	152	hypothetical protein D7D81_06295	QTL97187.1	152	hypothetical protein GM661_03940	99.342	152	1	0	1	152	1	152	4.05e-107	298
AZO94237.1	552	NAD+ synthase	QTL97188.1	552	Catalyzes the ATP-dependent amidation of deamido-NAD to form NAD. Uses L-glutamine as a nitrogen source	98.913	552	6	0	1	552	1	552	0	1113
AZO94238.1	439	diguanylate cyclase	QTL97189.1	439	diguanylate cyclase activity	98.633	439	6	0	1	439	1	439	0	878
AZO94239.1	149	hypothetical protein D7D81_06310	QTL97190.1	149	hypothetical protein GM661_03955	99.329	149	1	0	1	149	1	149	4.82e-105	293
AZO94240.1	358	LacI family transcriptional regulator	QTL97191.1	358	helix_turn _helix lactose operon repressor	99.721	358	1	0	1	358	1	358	0	743
AZO94241.1	332	TRAP transporter substrate-binding protein	QTL97192.1	332	Bacterial extracellular solute-binding protein, family 7	99.699	332	1	0	1	332	1	332	0	681
AZO94242.1	189	TRAP transporter small permease	QTL97193.1	210	Tripartite ATP-independent periplasmic transporters, DctQ component	98.942	189	2	0	1	189	22	210	3.11e-138	381
AZO94243.1	435	TRAP transporter large permease	QTL97194.1	435	TRAP transporter, DctM subunit	99.77	435	1	0	1	435	1	435	0	837
AZO94244.1	254	alpha/beta hydrolase	QTL99911.1	254	alpha/beta hydrolase fold	94.488	254	14	0	1	254	1	254	0	501
AZO94245.1	220	RraA family protein	QTL97195.1	220	Aldolase/RraA	99.545	220	1	0	1	220	1	220	1.48e-165	452
AZO94246.1	110	hydrolase	QTL97196.1	110	SAF	98.182	110	2	0	1	110	1	110	6.84e-78	221
AZO94247.1	407	D-galactarate dehydratase	QTL97197.1	407	D-galactarate dehydratase / Altronate hydrolase, C terminus	97.543	407	10	0	1	407	1	407	0	828
AZO94248.1	262	SDR family oxidoreductase	QTL97198.1	262	KR domain	99.237	262	2	0	1	262	1	262	0	541
AZO94249.1	466	glucuronate isomerase	QTL97199.1	466	glucuronate isomerase	98.712	466	6	0	1	466	1	466	0	961
AZO94250.1	372	mandelate racemase	QTL97200.1	372	Mandelate racemase / muconate lactonizing enzyme, C-terminal domain	98.656	372	5	0	1	372	1	372	0	765
AZO94251.1	366	mandelate racemase/muconate lactonizing enzyme family protein	QTL97201.1	366	Mandelate racemase / muconate lactonizing enzyme, C-terminal domain	99.727	366	1	0	1	366	1	366	0	751
AZO94252.1	259	ABC transporter ATP-binding protein	QTL97202.1	259	Branched-chain amino acid ATP-binding cassette transporter	99.228	259	2	0	1	259	1	259	0	530
AZO94253.1	423	amino acid ABC transporter substrate-binding protein	QTL97203.1	423	amino acid	98.582	423	6	0	1	423	1	423	0	858
AZO94254.1	284	branched-chain amino acid ABC transporter permease	QTL97204.1	284	PFAM Branched-chain amino acid transport system permease component	98.592	284	4	0	1	284	1	284	0	548
AZO94255.1	328	branched-chain amino acid ABC transporter permease	QTL97205.1	328	Belongs to the binding-protein-dependent transport system permease family	98.476	328	5	0	1	328	1	328	0	639
AZO94256.1	180	cupin domain-containing protein	QTL97206.1	180	Transcriptional regulator	100	180	0	0	1	180	1	180	3.61e-131	362
AZO94257.1	345	TRAP transporter substrate-binding protein DctP	QTL97207.1	345	COG1638 TRAP-type C4-dicarboxylate transport system, periplasmic component	97.681	345	8	0	1	345	1	345	0	696
AZO94258.1	166	TRAP transporter small permease	QTL97208.1	166	Tripartite ATP-independent periplasmic transporters, DctQ component	98.193	166	3	0	1	166	1	166	2.33e-117	325
AZO94259.1	255	D-alanyl-D-alanine dipeptidase	QTL97209.1	255	Catalyzes hydrolysis of the D-alanyl-D-alanine dipeptide	98.039	255	5	0	1	255	1	255	0	516
AZO94260.1	371	alanine dehydrogenase	QTL97210.1	371	Belongs to the AlaDH PNT family	98.652	371	5	0	1	371	1	371	0	734
AZO94261.1	74	hypothetical protein D7D81_06435	QTL97211.1	74	hypothetical protein GM661_04080	95.89	73	3	0	1	73	1	73	1.52e-43	132
AZO94262.1	143	MarR family transcriptional regulator	QTL97212.1	143	MarR family transcriptional regulator	95.804	143	6	0	1	143	1	143	1.3e-90	256
AZO94263.1	194	TetR/AcrR family transcriptional regulator	QTL97213.1	195	Bacterial regulatory proteins, tetR family	89.175	194	21	0	1	194	1	194	1.45e-125	348
AZO94264.1	445	TolC family protein	QTL96808.1	443	hypothetical protein GM661_01870	40.045	442	254	6	9	445	8	443	5.66e-94	287
AZO94265.1	507	efflux RND transporter periplasmic adaptor subunit	QTL96809.1	504	Belongs to the membrane fusion protein (MFP) (TC 8.A.1) family	40.748	508	296	3	1	507	1	504	1.25e-131	388
AZO94266.1	1014	efflux RND transporter permease subunit	QTL97216.1	1026	Belongs to the resistance-nodulation-cell division (RND) (TC 2.A.6) family	50.098	1018	497	8	1	1012	1	1013	0	1008
AZO94267.1	147	MarR family transcriptional regulator	QTL97217.1	147	DNA-binding transcription factor activity	99.32	147	1	0	1	147	1	147	4.33e-105	293
AZO94268.1	614	S-layer homology domain-containing protein	QTL97218.1	629	PFAM S-layer domain-containing protein	71.692	650	127	12	1	614	1	629	0	791
AZO94269.1	269	kinase/pyrophosphorylase	QTL97220.1	269	Bifunctional serine threonine kinase and phosphorylase involved in the regulation of the pyruvate, phosphate dikinase (PPDK) by catalyzing its phosphorylation dephosphorylation	98.141	269	5	0	1	269	1	269	0	531
AZO94270.1	325	class II fructose-bisphosphatase	QTL97221.1	325	TIGRFAM fructose-1,6-bisphosphatase, class II	98.154	325	6	0	1	325	1	325	0	647
AZO94271.1	339	GGDEF domain-containing protein	QTL97222.1	339	PFAM EAL domain	97.64	339	8	0	1	339	1	339	0	660
AZO94272.1	176	phosphatase PAP2 family protein	QTL97223.1	176	PAP2 superfamily	96.591	176	6	0	1	176	1	176	1.2e-120	335
AZO94273.1	384	glycosyltransferase family 1 protein	QTL97224.1	384	Glycosyltransferase Family 4	96.354	384	14	0	1	384	1	384	0	763
AZO94274.1	304	prenyltransferase	QTL97225.1	304	Belongs to the MenA family. Type 1 subfamily	99.342	304	2	0	1	304	1	304	0	608
AZO94275.1	517	Na+/H+ antiporter NhaC family protein	QTL97227.1	517	PFAM Na H antiporter	99.226	517	4	0	1	517	1	517	0	1019
AZO94276.1	219	CoA pyrophosphatase	QTL97228.1	219	NUDIX domain	97.717	219	5	0	1	219	1	219	4.75e-158	433
AZO94277.1	881	valine--tRNA ligase	QTL97229.1	881	amino acids such as threonine, to avoid such errors, it has a posttransfer editing activity that hydrolyzes mischarged Thr-tRNA(Val) in a tRNA-dependent manner	99.546	881	4	0	1	881	1	881	0	1805
AZO94278.1	418	sugar ABC transporter substrate-binding protein	QTL99699.1	427	Bacterial extracellular solute-binding protein	28.406	433	282	13	2	418	6	426	2.86e-51	175
AZO94279.1	271	carbohydrate ABC transporter permease	QTL99782.1	279	Binding-protein-dependent transport system inner membrane component	36.94	268	167	1	6	271	12	279	1.46e-64	200
AZO94280.1	316	hypothetical protein D7D81_06540	QTL97286.1	313	sugar-binding domain protein	27.922	308	214	5	1	305	1	303	2.17e-32	119
AZO94281.1	314	ribokinase	QTL99623.1	310	Belongs to the carbohydrate kinase PfkB family. LacC subfamily	27.362	307	211	5	6	309	5	302	2.7e-32	119
AZO94282.1	479	hypothetical protein D7D81_06550	QTL99626.1	510	FGGY family of carbohydrate kinases, N-terminal domain	22.881	472	342	8	8	468	3	463	1.38e-30	120
AZO94283.1	282	class II fructose-bisphosphate aldolase	QTL99624.1	293	PFAM ketose-bisphosphate aldolase, class-II	42.599	277	157	1	1	275	1	277	3.13e-72	221
AZO94284.1	263	trehalose-phosphatase	QTL97230.1	262	Removes the phosphate from trehalose 6-phosphate to produce free trehalose	98.846	260	3	0	1	260	1	260	0	509
AZO94285.1	472	trehalose-6-phosphate synthase	QTL97231.1	472	PFAM Glycosyl transferase, family 20	99.576	472	2	0	1	472	1	472	0	976
AZO94286.1	404	pyridoxal phosphate-dependent aminotransferase	QTL97232.1	404	PFAM aminotransferase class I and II	97.772	404	9	0	1	404	1	404	0	820
AZO94287.1	1286	DUF445 family protein	QTL97233.1	1286	DUF445 family protein	94.868	1286	66	0	1	1286	1	1286	0	2381
AZO94288.1	1078	hypothetical protein D7D81_06585	QTL97235.1	1078	Glycosyltransferase 36 associated	98.516	1078	16	0	1	1078	1	1078	0	2174
AZO94289.1	417	extracellular solute-binding protein	QTL97236.1	417	Bacterial extracellular solute-binding protein	99.041	417	4	0	1	417	1	417	0	849
AZO94290.1	303	sugar ABC transporter permease	QTL97237.1	303	PFAM Binding-protein-dependent transport system inner membrane component	100	303	0	0	1	303	1	303	0	604
AZO94291.1	293	carbohydrate ABC transporter permease	QTL97238.1	293	Binding-protein-dependent transport system inner membrane component	100	293	0	0	1	293	1	293	0	582
AZO94292.1	905	cellobiose phosphorylase	QTL97239.1	903	Glycosyl hydrolase 36 superfamily, catalytic domain	97.79	905	18	1	1	905	1	903	0	1835
AZO94293.1	660	transketolase	QTL97240.1	660	Belongs to the transketolase family	99.394	660	4	0	1	660	1	660	0	1343
AZO94294.1	722	cell division protein FtsA	QTL97242.1	722	cell division protein FtsA	98.892	722	8	0	1	722	1	722	0	1425
AZO94295.1	143	divergent PAP2 family protein	QTL97243.1	143	Acid phosphatase vanadium-dependent haloperoxidase related	100	143	0	0	1	143	1	143	2.49e-101	283
AZO94296.1	463	bifunctional folylpolyglutamate synthase/dihydrofolate synthase	QTL97244.1	463	Mur ligase family, glutamate ligase domain	97.84	463	10	0	1	463	1	463	0	910
AZO94297.1	160	SPOR domain-containing protein	QTL97245.1	160	PFAM Sporulation related domain	99.375	160	1	0	1	160	1	160	5.61e-115	319
AZO94298.1	441	electron transport complex subunit RsxC	QTL97246.1	441	Part of a membrane complex involved in electron transport	100	441	0	0	1	441	1	441	0	881
AZO94299.1	325	RnfABCDGE type electron transport complex subunit D	QTL97247.1	325	Part of a membrane complex involved in electron transport	98.769	325	4	0	1	325	1	325	0	638
AZO94300.1	177	RnfABCDGE type electron transport complex subunit G	QTL97248.1	177	Part of a membrane complex involved in electron transport	100	177	0	0	1	177	1	177	4.51e-129	356
AZO94301.1	204	electron transport complex subunit E	QTL97249.1	204	Part of a membrane complex involved in electron transport	100	204	0	0	1	204	1	204	2.92e-146	402
AZO94302.1	196	electron transport complex subunit RsxA	QTL97250.1	196	Part of a membrane complex involved in electron transport	100	196	0	0	1	196	1	196	5.25e-138	380
AZO94303.1	329	RnfABCDGE type electron transport complex subunit B	QTL97251.1	336	TIGRFAM electron transport complex, RnfABCDGE type, B subunit	99.088	329	3	0	1	329	1	329	0	648
AZO94304.1	139	NusG domain II-containing protein	QTL97252.1	139	NusG domain II	98.561	139	2	0	1	139	1	139	1.06e-97	274
AZO94305.1	175	Gx transporter family protein	QTL97253.1	175	PFAM Heptaprenyl diphosphate synthase component I	98.857	175	2	0	1	175	1	175	4.27e-118	328
AZO94306.1	191	septum formation inhibitor Maf	QTL97254.1	191	TIGRFAM maf protein	97.906	191	4	0	1	191	1	191	2.91e-137	378
AZO94307.1	231	JAB domain-containing protein	QTL97255.1	231	TIGRFAM DNA repair protein RadC	99.567	231	1	0	1	231	1	231	1.01e-165	453
AZO94308.1	280	rod shape-determining protein MreC	QTL97257.1	280	Involved in formation and maintenance of cell shape	99.286	280	2	0	1	280	1	280	0	552
AZO94309.1	164	rod shape-determining protein MreD	QTL97258.1	165	TIGRFAM rod shape-determining protein MreD	98.765	162	2	0	1	162	1	162	1.11e-107	301
AZO94310.1	623	penicillin-binding protein 2	QTL97259.1	623	Penicillin-binding protein dimerisation domain	99.037	623	6	0	1	623	1	623	0	1248
AZO94311.1	201	septum site-determining protein MinC	QTL97260.1	201	Cell division inhibitor that blocks the formation of polar Z ring septums. Rapidly oscillates between the poles of the cell to destabilize FtsZ filaments that have formed before they mature into polar Z rings. Prevents FtsZ polymerization	98.507	201	3	0	1	201	1	201	1.15e-144	397
AZO94312.1	264	septum site-determining protein MinD	QTL97261.1	264	TIGRFAM septum site-determining protein MinD	100	264	0	0	1	264	1	264	0	521
AZO94313.1	80	cell division topological specificity factor MinE	QTL97262.1	80	Prevents the cell division inhibition by proteins MinC and MinD at internal division sites while permitting inhibition at polar sites. This ensures cell division at the proper site by restricting the formation of a division septum at the midpoint of the long axis of the cell	100	80	0	0	1	80	1	80	1.48e-54	160
AZO94314.1	379	rod shape-determining protein RodA	QTL97263.1	379	Belongs to the SEDS family. MrdB RodA subfamily	98.945	379	4	0	1	379	1	379	0	739
AZO94315.1	288	hypothetical protein D7D81_06725	QTL97264.1	288	PFAM Peptidase family M50	98.958	288	3	0	1	288	1	288	0	566
AZO94316.1	620	TIGR03960 family B12-binding radical SAM protein	QTL97265.1	620	PFAM Radical SAM	98.387	620	10	0	1	620	1	620	0	1254
AZO94317.1	232	DUF2344 domain-containing protein	QTL97266.1	232	Uncharacterized protein conserved in bacteria (DUF2344)	98.707	232	3	0	1	232	1	232	2.93e-167	457
AZO94318.1	561	Rne/Rng family ribonuclease	QTL97267.1	561	TIGRFAM ribonuclease, Rne Rng family	99.109	561	5	0	1	561	1	561	0	1129
AZO94319.1	531	hypothetical protein D7D81_06745	QTL97268.1	531	Predicted AAA-ATPase	93.22	531	36	0	1	531	1	531	0	995
AZO94320.1	132	HEPN domain-containing protein	QTL97269.1	109	HEPN domain	99.074	108	1	0	1	108	1	108	6.21e-78	222
AZO94321.1	111	nucleotidyltransferase domain-containing protein	QTL97270.1	111	Nucleotidyltransferase domain	100	111	0	0	1	111	1	111	3.58e-80	227
AZO94323.1	70	LLM class flavin-dependent oxidoreductase	QTL97271.1	70	LLM class flavin-dependent oxidoreductase	100	70	0	0	1	70	1	70	6.08e-47	140
AZO94324.1	69	XRE family transcriptional regulator	QTL97272.1	69	Cro/C1-type HTH DNA-binding domain	98.551	69	1	0	1	69	1	69	2.12e-46	139
AZO94325.1	79	hypothetical protein D7D81_06780	QTL97273.1	79	hypothetical protein GM661_04390	100	79	0	0	1	79	1	79	1.99e-52	154
AZO94326.1	103	50S ribosomal protein L21	QTL97274.1	103	This protein binds to 23S rRNA in the presence of protein L20	100	103	0	0	1	103	1	103	2.26e-70	202
AZO94327.1	92	50S ribosomal protein L27	QTL97275.1	92	Belongs to the bacterial ribosomal protein bL27 family	100	92	0	0	1	92	1	92	3.28e-63	183
AZO94328.1	427	GTPase ObgE	QTL97276.1	427	An essential GTPase which binds GTP, GDP and possibly (p)ppGpp with moderate affinity, with high nucleotide exchange rates and a fairly low GTP hydrolysis rate. Plays a role in control of the cell cycle, stress response, ribosome biogenesis and in those bacteria that undergo differentiation, in morphogenesis control	98.361	427	7	0	1	427	1	427	0	837
AZO94329.1	97	ribosome assembly RNA-binding protein YhbY	QTL97277.1	97	PFAM CRS1 YhbY (CRM) domain	97.938	97	2	0	1	97	1	97	1.68e-67	194
AZO94330.1	635	ABC transporter ATP-binding protein	QTL97278.1	635	PFAM ABC transporter	99.37	635	4	0	1	635	1	635	0	1274
AZO94331.1	332	hypothetical protein D7D81_06810	QTL97279.1	256	hypothetical protein GM661_04420	97.233	253	7	0	1	253	1	253	3.84e-167	462
AZO94331.1	332	hypothetical protein D7D81_06810	QTL97279.1	256	hypothetical protein GM661_04420	94.231	208	11	1	126	332	49	256	2.44e-129	367
AZO94332.1	393	phosphopentomutase	QTL97280.1	393	Phosphotransfer between the C1 and C5 carbon atoms of pentose	97.201	393	11	0	1	393	1	393	0	771
AZO94333.1	301	ribokinase	QTL97281.1	301	Catalyzes the phosphorylation of ribose at O-5 in a reaction requiring ATP and magnesium. The resulting D-ribose-5- phosphate can then be used either for sythesis of nucleotides, histidine, and tryptophan, or as a component of the pentose phosphate pathway	98.339	301	5	0	1	301	1	301	0	598
AZO94334.1	233	purine-nucleoside phosphorylase	QTL97282.1	233	phosphorylase, family 1	99.142	233	2	0	1	233	1	233	2.83e-175	478
AZO94335.1	255	glutamate racemase	QTL97283.1	255	Provides the (R)-glutamate required for cell wall biosynthesis	98.431	255	4	0	1	255	1	255	0	516
AZO94336.1	1532	glutamate synthase large subunit	QTL97284.1	1532	glutamate synthase	99.217	1532	12	0	1	1532	1	1532	0	3145
AZO94337.1	490	glutamate synthase subunit beta	QTL97285.1	490	glutamate synthase	99.388	490	3	0	1	490	1	490	0	1004
AZO94338.1	258	ABC transporter substrate-binding protein	QTL97091.1	265	Belongs to the bacterial solute-binding protein 3 family	33.708	267	166	4	1	258	1	265	2.87e-42	142
AZO94339.1	236	amino acid ABC transporter permease	QTL97105.1	234	TIGRFAM polar amino acid ABC transporter, inner membrane subunit	35.498	231	133	3	1	217	1	229	4.01e-39	132
AZO94340.1	240	amino acid ABC transporter ATP-binding protein	QTL99909.1	240	abc transporter atp-binding protein	60.417	240	95	0	1	240	1	240	2.17e-103	296
AZO94341.1	313	winged helix-turn-helix transcriptional regulator	QTL97286.1	313	sugar-binding domain protein	99.681	313	1	0	1	313	1	313	0	625
AZO94342.1	306	sugar ABC transporter substrate-binding protein	QTL97287.1	306	Periplasmic binding protein domain	98.693	306	4	0	1	306	1	306	0	614
AZO94343.1	493	sugar ABC transporter ATP-binding protein	QTL97288.1	500	import. Responsible for energy coupling to the transport system	99.189	493	4	0	1	493	8	500	0	965
AZO94344.1	310	ABC transporter permease	QTL97289.1	310	Belongs to the binding-protein-dependent transport system permease family	99.677	310	1	0	1	310	1	310	0	592
AZO94345.1	263	hypothetical protein D7D81_06885	QTL97290.1	263	The alpha subunit is responsible for the aldol cleavage of indoleglycerol phosphate to indole and glyceraldehyde 3- phosphate	98.859	263	3	0	1	263	1	263	0	531
AZO94346.1	496	hypothetical protein D7D81_06890	QTL97291.1	496	FGGY family of carbohydrate kinases, N-terminal domain	98.387	496	8	0	1	496	1	496	0	983
AZO94347.1	599	sensor histidine kinase	QTL97292.1	599	Histidine kinase	92.821	599	43	0	1	599	1	599	0	1098
AZO94348.1	486	response regulator	QTL97293.1	486	helix-turn-helix- domain containing protein, AraC type	77.572	486	109	0	1	486	1	486	0	739
AZO94349.1	319	porin	QTL97294.1	327	porin	82.875	327	48	2	1	319	1	327	0	550
AZO94350.1	427	extracellular solute-binding protein	QTL97295.1	427	Bacterial extracellular solute-binding protein	99.063	427	4	0	1	427	1	427	0	873
AZO94351.1	282	carbohydrate ABC transporter permease	QTL97296.1	282	Binding-protein-dependent transport system inner membrane component	99.291	282	2	0	1	282	1	282	0	563
AZO94352.1	1275	exopolygalacturonate lyase	QTL97297.1	1275	Bacterial Ig-like domain (group 3)	97.255	1275	35	0	1	1275	1	1275	0	2511
AZO94353.1	424	extracellular solute-binding protein	QTL97298.1	424	extracellular solute-binding protein	99.292	424	3	0	1	424	1	424	0	871
AZO94354.1	423	gfo/Idh/MocA family oxidoreductase	QTL97299.1	423	Oxidoreductase family, C-terminal alpha/beta domain	98.345	423	7	0	1	423	1	423	0	867
AZO94355.1	472	glycoside hydrolase family 28 protein	QTL97300.1	472	Belongs to the glycosyl hydrolase 28 family	96.61	472	16	0	1	472	1	472	0	933
AZO94356.1	352	hypothetical protein D7D81_06950	QTL97301.1	352	Abhydrolase family	94.886	352	18	0	1	352	1	352	0	701
AZO94357.1	280	AraC family transcriptional regulator	QTL97302.1	281	transcriptional regulator (AraC family)	96.774	279	9	0	1	279	1	279	0	553
AZO94358.1	225	FadR family transcriptional regulator	QTL97303.1	225	FCD	100	225	0	0	1	225	1	225	6.39e-166	453
AZO94359.1	274	transketolase	QTL97304.1	274	PFAM Transketolase	99.635	274	1	0	1	274	1	274	0	557
AZO94360.1	308	transketolase family protein	QTL97305.1	308	PFAM Transketolase, C-terminal domain	99.675	308	1	0	1	308	1	308	0	627
AZO94361.1	296	2-hydroxy-3-oxopropionate reductase	QTL97306.1	296	NAD binding domain	98.305	295	5	0	1	295	1	295	0	579
AZO94363.1	352	DctP family TRAP transporter solute-binding subunit	QTL97307.1	352	carbohydrate transport	99.432	352	2	0	1	352	1	352	0	717
AZO94364.1	175	TRAP transporter small permease	QTL97308.1	175	Trap-type c4-dicarboxylate transport system, small permease component	98.857	175	2	0	1	175	1	175	5.32e-124	343
AZO94365.1	426	TRAP transporter large permease	QTL97309.1	426	mannitol 2-dehydrogenase activity	99.765	426	1	0	1	426	1	426	0	826
AZO94366.1	344	Zn-dependent alcohol dehydrogenase	QTL97310.1	344	COG1063 Threonine dehydrogenase and related Zn-dependent dehydrogenases	99.419	344	2	0	1	344	1	344	0	694
AZO94367.1	949	sensor histidine kinase	QTL97311.1	949	Histidine kinase-, DNA gyrase B-, and HSP90-like ATPase	97.576	949	23	0	1	949	1	949	0	1848
AZO94368.1	531	response regulator	QTL97312.1	531	helix_turn_helix, arabinose operon control protein	97.363	531	14	0	1	531	1	531	0	1037
AZO94369.1	407	sugar ABC transporter substrate-binding protein	QTL97313.1	407	Bacterial extracellular solute-binding protein	99.754	407	1	0	1	407	1	407	0	843
AZO94370.1	286	sugar ABC transporter permease	QTL97314.1	286	PFAM binding-protein-dependent transport systems inner membrane component	99.301	286	2	0	1	286	1	286	0	565
AZO94371.1	276	carbohydrate ABC transporter permease	QTL97315.1	276	Binding-protein-dependent transport system inner membrane component	99.638	276	1	0	1	276	1	276	0	542
AZO94372.1	265	transketolase	QTL97316.1	265	PFAM Transketolase	98.491	265	4	0	1	265	1	265	0	531
AZO94373.1	309	transketolase family protein	QTL97317.1	309	PFAM Transketolase, C-terminal domain	99.676	309	1	0	1	309	1	309	0	630
AZO94374.1	582	carbon starvation protein A	QTL97392.1	564	carbon starvation protein CstA	33.771	533	293	12	1	516	1	490	2.28e-85	273
AZO94378.1	428	ROK family transcriptional regulator	QTL97318.1	428	ROK family	99.533	428	2	0	1	428	1	428	0	855
AZO94379.1	512	tagaturonate reductase	QTL97319.1	512	Mannitol dehydrogenase	96.484	512	18	0	1	512	1	512	0	1011
AZO94380.1	504	altronate dehydratase	QTL97320.1	504	PFAM D-galactarate dehydratase Altronate hydrolase	96.627	504	17	0	1	504	1	504	0	981
AZO94381.1	456	glucuronate isomerase	QTL97321.1	456	glucuronate isomerase	99.561	456	2	0	1	456	1	456	0	952
AZO94382.1	349	hypothetical protein D7D81_07080	QTL97322.1	350	hypothetical protein GM661_04645	86.533	349	45	1	1	349	1	347	0	530
AZO94383.1	135	hypothetical protein D7D81_07085	QTL97323.1	149	hypothetical protein GM661_04650	61.029	136	39	6	1	128	1	130	3.46e-44	139
AZO94384.1	377	hypothetical protein D7D81_07090	QTL97324.1	356	hypothetical protein GM661_04655	74.394	371	77	3	1	370	1	354	1.67e-167	469
AZO94385.1	995	hypothetical protein D7D81_07095	QTL97325.1	996	hypothetical protein GM661_04660	88.188	999	111	2	1	995	1	996	0	1759
AZO94386.1	1118	hypothetical protein D7D81_07100	QTL97326.1	1123	Rhs element vgr protein	96.883	1123	30	1	1	1118	1	1123	0	2205
AZO94387.1	346	LacI family transcriptional regulator	QTL97328.1	346	helix_turn _helix lactose operon repressor	97.977	346	7	0	1	346	1	346	0	691
AZO94388.1	268	sugar phosphate isomerase/epimerase	QTL97329.1	268	COG1082 Sugar phosphate	97.761	268	6	0	1	268	1	268	0	545
AZO94389.1	337	tripartite tricarboxylate transporter substrate binding protein	QTL97330.1	337	Tripartite tricarboxylate transporter family receptor	99.703	337	1	0	1	337	1	337	0	673
AZO94390.1	173	hypothetical protein D7D81_07120	QTL97331.1	173	Tripartite tricarboxylate transporter TctB family	96.532	173	6	0	1	173	1	173	1.88e-118	329
AZO94391.1	399	gfo/Idh/MocA family oxidoreductase	QTL97333.1	399	inositol 2-dehydrogenase activity	97.744	399	9	0	1	399	1	399	0	803
AZO94392.1	443	NADH:flavin oxidoreductase	QTL97334.1	443	PFAM NADH flavin oxidoreductase NADH oxidase family	98.42	443	7	0	1	443	1	443	0	903
AZO94393.1	409	gfo/Idh/MocA family oxidoreductase	QTL97335.1	406	Oxidoreductase domain protein	98.511	403	6	0	1	403	1	403	0	823
AZO94394.1	329	gfo/Idh/MocA family oxidoreductase	QTL97336.1	329	Oxidoreductase domain protein	97.568	329	8	0	1	329	1	329	0	666
AZO94395.1	263	3-ketoacyl-ACP reductase	QTL97337.1	263	PFAM short-chain dehydrogenase reductase SDR	97.719	263	6	0	1	263	1	263	0	520
AZO94396.1	669	FAD-binding protein	QTL97338.1	669	PFAM fumarate reductase succinate dehydrogenase flavoprotein	97.907	669	14	0	1	669	1	669	0	1352
AZO94397.1	340	sugar kinase	QTL97339.1	340	Kinase, PfkB family	99.118	340	3	0	1	340	1	340	0	695
AZO94398.1	322	ABC transporter substrate-binding protein	QTL97340.1	322	Periplasmic binding proteins and sugar binding domain of LacI family	98.137	322	6	0	1	322	1	322	0	648
AZO94399.1	503	sugar ABC transporter ATP-binding protein	QTL97341.1	503	ABC-type sugar transport system, ATPase component	95.427	503	23	0	1	503	1	503	0	947
AZO94400.1	348	ABC transporter permease	QTL97342.1	348	PFAM ABC-type transporter, integral membrane subunit	97.126	348	10	0	1	348	1	348	0	656
AZO94401.1	337	sugar ABC transporter permease YjfF	QTL97343.1	337	Membrane component of a	94.065	337	20	0	1	337	1	337	0	584
AZO94402.1	708	PRD domain-containing protein	QTL99776.1	281	transcriptional antiterminator	30.088	226	143	6	189	412	62	274	1.17e-21	92.4
AZO94404.1	309	1-phosphofructokinase	QTL99847.1	309	Belongs to the carbohydrate kinase PfkB family. LacC subfamily	34.982	283	182	2	1	282	1	282	1.67e-52	171
AZO94405.1	420	L-sorbose 1-phosphate reductase	QTL96594.1	351	Alcohol dehydrogenase GroES-like domain	25.767	326	198	9	4	321	2	291	4.81e-16	75.5
AZO94406.1	93	HPr family phosphocarrier protein	QTL99844.1	89	TIGRFAM Phosphotransferase System HPr (HPr) Family	44.318	88	44	2	3	90	5	87	3.4e-20	74.3
AZO94407.1	575	phosphoenolpyruvate--protein phosphotransferase	QTL97650.1	572	General (non sugar-specific) component of the phosphoenolpyruvate-dependent sugar phosphotransferase system (sugar PTS). This major carbohydrate active-transport system catalyzes the phosphorylation of incoming sugar substrates concomitantly with their translocation across the cell membrane. Enzyme I transfers the phosphoryl group from phosphoenolpyruvate (PEP) to the phosphoryl carrier protein (…	48.944	568	281	4	4	563	1	567	0	556
AZO94408.1	389	ROK family transcriptional regulator	QTL97344.1	389	ROK family	97.429	389	10	0	1	389	1	389	0	766
AZO94409.1	328	UDP-glucose 4-epimerase GalE	QTL97345.1	328	Belongs to the NAD(P)-dependent epimerase dehydratase family	99.085	328	3	0	1	328	1	328	0	664
AZO94410.1	325	galactose-1-phosphate uridylyltransferase	QTL97346.1	325	PFAM Galactose-1-phosphate uridyl transferase	97.846	325	7	0	1	325	1	325	0	660
AZO94411.1	388	galactokinase	QTL97347.1	388	Catalyzes the transfer of the gamma-phosphate of ATP to D-galactose to form alpha-D-galactose-1-phosphate (Gal-1-P)	95.876	388	16	0	1	388	1	388	0	767
AZO94412.1	364	galactose mutarotase	QTL97348.1	364	Converts alpha-aldose to the beta-anomer	97.527	364	9	0	1	364	1	364	0	735
AZO94413.1	360	DUF362 domain-containing protein	QTL97349.1	360	Domain of unknown function (DUF362)	96.944	360	11	0	1	360	1	360	0	719
AZO94414.1	265	N-acetylmuramoyl-L-alanine amidase	QTL97350.1	267	PFAM Copper amine oxidase N-terminal domain	96.255	267	8	1	1	265	1	267	0	520
AZO94415.1	237	conjugal transfer protein TraR	QTL97351.1	231	PFAM Prokaryotic dksA traR C4-type zinc finger	96.104	231	9	0	7	237	1	231	1.92e-166	455
AZO94416.1	68	hypothetical protein D7D81_07265	QTL97352.1	68	hypothetical protein GM661_04800	94.118	68	4	0	1	68	1	68	6.51e-42	127
AZO94417.1	640	anaerobic carbon-monoxide dehydrogenase catalytic subunit	QTL97353.1	640	carbon-monoxide dehydrogenase catalytic subunit	98.906	640	7	0	1	640	1	640	0	1307
AZO94418.1	606	ABC transporter ATP-binding protein	QTL97354.1	606	ABC transporter	99.505	606	3	0	1	606	1	606	0	1231
AZO94419.1	595	ABC transporter ATP-binding protein	QTL97355.1	595	ABC transporter transmembrane region	98.319	595	10	0	1	595	1	595	0	1201
AZO94420.1	420	membrane protein insertion efficiency factor YidD	QTL97357.1	420	protein trimerization	99.048	420	4	0	1	420	1	420	0	840
AZO94421.1	164	hypothetical protein D7D81_07290	QTL97358.1	164	hypothetical protein GM661_04830	100	164	0	0	1	164	1	164	7.11e-115	319
AZO94422.1	174	tetratricopeptide repeat protein	QTL97359.1	174	tetratricopeptide repeat protein	99.425	174	1	0	1	174	1	174	2.74e-122	338
AZO94423.1	553	dihydroxy-acid dehydratase	QTL97363.1	567	Belongs to the IlvD Edd family	99.638	553	2	0	1	553	15	567	0	1120
AZO94424.1	326	DctP family TRAP transporter solute-binding subunit	QTL99453.1	325	carbohydrate transport	35.826	321	203	3	2	320	3	322	7.13e-72	223
AZO94425.1	157	TRAP transporter small permease	QTL97397.1	152	Tripartite ATP-independent periplasmic transporters, DctQ component	35.811	148	94	1	9	155	2	149	8.77e-22	82.8
AZO94426.1	416	TRAP transporter large permease subunit	QTL99338.1	423	Tripartite ATP-independent periplasmic transporter, DctM component	44.388	392	218	0	5	396	5	396	7.29e-122	357
AZO94427.1	191	rubrerythrin family protein	QTL97365.1	191	Ferritin-like domain	100	191	0	0	1	191	1	191	7.96e-139	382
AZO94428.1	379	acyl-CoA dehydrogenase	QTL97366.1	379	acyl-CoA dehydrogenase	99.208	379	3	0	1	379	1	379	0	773
AZO94429.1	261	electron transfer flavoprotein subunit beta/FixA family protein	QTL97367.1	261	electron transfer flavoprotein	100	261	0	0	1	261	1	261	0	528
AZO94430.1	366	electron transfer flavoprotein subunit alpha/FixB family protein	QTL97368.1	366	electron transfer flavoprotein	98.63	365	5	0	1	365	1	365	0	736
AZO94432.1	281	3-hydroxybutyryl-CoA dehydrogenase	QTL97369.1	281	3-hydroxyacyl-CoA dehydrogenase, NAD binding domain	98.221	281	5	0	1	281	1	281	0	563
AZO94433.1	392	acetyl-CoA C-acetyltransferase	QTL97370.1	392	Belongs to the thiolase family	98.469	392	6	0	1	392	1	392	0	779
AZO94434.1	428	acetyl-CoA hydrolase/transferase family protein	QTL97371.1	428	PFAM Acetyl-CoA hydrolase transferase	99.533	428	2	0	1	428	1	428	0	873
AZO94435.1	316	AraC family transcriptional regulator	QTL97372.1	316	sequence-specific DNA binding	99.051	316	3	0	1	316	1	316	0	634
AZO94436.1	542	spore germination protein	QTL97373.1	542	Psort location CytoplasmicMembrane, score 10.00	97.97	542	11	0	1	542	1	542	0	1075
AZO94437.1	396	Ger(x)C family spore germination protein	QTL97374.1	396	PFAM spore germination B3 GerAC	94.192	396	23	0	1	396	1	396	0	707
AZO94438.1	359	hypothetical protein D7D81_07390	QTL97375.1	359	TIGRFAM spore germination protein (amino acid permease)	92.758	359	26	0	1	359	1	359	0	639
AZO94439.1	72	hypothetical protein D7D81_07395	QTL97376.1	72	hypothetical protein GM661_04935	97.222	72	2	0	1	72	1	72	1.66e-45	137
AZO94440.1	86	hypothetical protein D7D81_07400	QTL97377.1	86	hypothetical protein GM661_04940	98.824	85	1	0	1	85	1	85	3.72e-57	167
AZO94441.1	151	hypothetical protein D7D81_07405	QTL97378.1	151	spore germination	100	151	0	0	1	151	1	151	3.96e-108	301
AZO94442.1	279	MurR/RpiR family transcriptional regulator	QTL97379.1	279	Helix-turn-helix domain, rpiR family	99.642	279	1	0	1	279	1	279	0	552
AZO94443.1	288	cell division protein FtsQ	QTL97380.1	288	Cell division protein FtsQ	100	288	0	0	1	288	1	288	0	570
AZO94444.1	275	energy-coupling factor transporter transmembrane protein EcfT	QTL97381.1	275	Cobalt transport protein	98.909	275	3	0	1	275	1	275	0	536
AZO94445.1	246	PHP domain-containing protein	QTL97382.1	246	PHP-associated	100	246	0	0	1	246	1	246	0	500
AZO94446.1	255	exodeoxyribonuclease III	QTL97383.1	255	Endonuclease/Exonuclease/phosphatase family	99.608	255	1	0	1	255	1	255	0	524
AZO94447.1	109	tRNA-binding protein	QTL97384.1	109	PFAM t-RNA-binding domain protein	97.248	109	3	0	1	109	1	109	2.44e-74	212
AZO94448.1	231	DUF2278 family protein	QTL97386.1	231	Uncharacterized conserved protein (DUF2278)	98.701	231	3	0	1	231	1	231	5.36e-174	474
AZO94449.1	324	DUF3231 family protein	QTL97387.1	324	Protein of unknown function (DUF3231)	98.765	324	4	0	1	324	1	324	0	652
AZO94450.1	634	diguanylate cyclase	QTL97388.1	634	7TM diverse intracellular signalling	99.842	634	1	0	1	634	1	634	0	1271
AZO94451.1	458	SLC13 family permease	QTL97389.1	458	sodium sulphate symporter	98.908	458	5	0	1	458	1	458	0	886
AZO94452.1	420	UV damage repair protein UvrX	QTL97390.1	420	Belongs to the DNA polymerase type-Y family	99.524	420	2	0	1	420	1	420	0	861
AZO94453.1	101	YolD-like family protein	QTL97391.1	101	YolD-like protein	100	101	0	0	1	101	1	101	1.22e-69	200
AZO94454.1	564	carbon starvation protein A	QTL97392.1	564	carbon starvation protein CstA	98.759	564	7	0	1	564	1	564	0	1100
AZO94455.1	244	GntR family transcriptional regulator	QTL97393.1	220	Transcriptional regulator, GntR family	99.091	220	2	0	25	244	1	220	2.85e-159	437
AZO94456.1	336	zinc-binding alcohol dehydrogenase family protein	QTL97394.1	336	Alcohol dehydrogenase GroES-like domain	99.702	336	1	0	1	336	1	336	0	678
AZO94457.1	327	DctP family TRAP transporter solute-binding subunit	QTL97395.1	327	carbohydrate transport	99.083	327	3	0	1	327	1	327	0	667
AZO94458.1	346	zinc-binding alcohol dehydrogenase family protein	QTL97396.1	346	Alcohol dehydrogenase	98.555	346	5	0	1	346	1	346	0	695
AZO94459.1	152	TRAP transporter small permease	QTL97397.1	152	Tripartite ATP-independent periplasmic transporters, DctQ component	98.026	152	3	0	1	152	1	152	3.97e-106	296
AZO94460.1	423	TRAP transporter large permease	QTL97398.1	423	mannitol 2-dehydrogenase activity	99.764	423	1	0	1	423	1	423	0	815
AZO94461.1	120	ArsR family transcriptional regulator	QTL97583.1	120	regulatory protein, arsR	83.333	120	19	1	1	120	1	119	2.49e-68	198
AZO94464.1	133	arsenate reductase ArsC	QTL97584.1	133	Low molecular weight phosphatase family	86.466	133	18	0	1	133	1	133	2.83e-85	242
AZO94465.1	110	ArsR family transcriptional regulator	QTL97399.1	110	Bacterial regulatory protein, arsR family	100	110	0	0	1	110	1	110	1.01e-78	223
AZO94466.1	390	permease	QTL97400.1	390	Predicted permease	98.718	390	5	0	1	390	1	390	0	764
AZO94467.1	77	thioredoxin family protein	QTL97401.1	77	TIGRFAM small redox-active disulfide protein 2	96.053	76	3	0	1	76	1	76	9.19e-48	142
AZO94470.1	467	MATE family efflux transporter	QTL97402.1	470	Polysaccharide biosynthesis C-terminal domain	98.715	467	6	0	1	467	1	467	0	909
AZO94471.1	151	MarR family transcriptional regulator	QTL97403.1	151	helix_turn_helix multiple antibiotic resistance protein	96.026	151	6	0	1	151	1	151	4.92e-104	291
AZO94472.1	265	LytR family transcriptional regulator	QTL97404.1	268	hypothetical protein GM661_05090	99.245	265	2	0	1	265	4	268	0	527
AZO94473.1	375	plasmid pRiA4b ORF-3 family protein	QTL97406.1	375	Plasmid pRiA4b ORF-3-like protein	99.467	375	2	0	1	375	1	375	0	770
AZO94474.1	52	hypothetical protein D7D81_07620	QTL97407.1	52	hypothetical protein GM661_05130	90.385	52	5	0	1	52	1	52	1.57e-29	95.1
AZO94475.1	292	AraC family transcriptional regulator	QTL97408.1	292	helix_turn_helix, arabinose operon control protein	98.63	292	4	0	1	292	1	292	0	589
AZO94476.1	239	hypothetical protein D7D81_07630	QTL97409.1	239	Trehalose utilisation	98.745	239	3	0	1	239	1	239	1.1e-179	489
AZO94477.1	359	gfo/Idh/MocA family oxidoreductase	QTL97410.1	359	PFAM oxidoreductase	98.05	359	7	0	1	359	1	359	0	728
AZO94478.1	113	nucleotidyltransferase domain-containing protein	QTL97270.1	111	Nucleotidyltransferase domain	31.959	97	65	1	17	112	7	103	3.9e-12	55.1
AZO94479.1	136	HEPN domain-containing protein	QTL97269.1	109	HEPN domain	38.739	111	62	3	6	115	1	106	1.69e-20	77.4
AZO94481.1	144	MarR family transcriptional regulator	QTL97412.1	144	MarR family	98.611	144	2	0	1	144	1	144	2.51e-105	293
AZO94482.1	583	ABC transporter ATP-binding protein	QTL97413.1	583	ABC-type multidrug transport system ATPase and permease	97.084	583	17	0	1	583	1	583	0	1152
AZO94483.1	251	class I SAM-dependent methyltransferase	QTL97414.1	251	Methylase involved in ubiquinone menaquinone biosynthesis	97.61	251	6	0	1	251	1	251	0	510
AZO94484.1	394	pyridoxal phosphate-dependent aminotransferase	QTL97418.1	396	Aminotransferase class I and II	97.462	394	10	0	1	394	1	394	0	798
AZO94486.1	286	AraC family transcriptional regulator	QTL97420.1	286	transcription activator, effector binding	96.503	286	10	0	1	286	1	286	0	579
AZO94487.1	320	ABC transporter ATP-binding protein	QTL97421.1	320	ATPases associated with a variety of cellular activities	96.562	320	11	0	1	320	1	320	0	636
AZO94488.1	251	ABC transporter permease	QTL97422.1	251	Transport permease protein	99.602	251	1	0	1	251	1	251	2.9e-179	489
AZO94489.1	127	nucleotidyltransferase domain-containing protein	QTL97423.1	127	DNA polymerase beta domain protein region	99.213	127	1	0	1	127	1	127	2.82e-88	249
AZO94491.1	161	flavodoxin	QTL97434.1	157	Flavodoxin	94.268	157	9	0	5	161	1	157	5.11e-108	301
AZO94492.1	402	serine hydrolase	QTL97436.1	64	hypothetical protein GM661_05285	96.875	64	2	0	4	67	1	64	2.32e-35	121
AZO94493.1	554	ABC-F type ribosomal protection protein	QTL97437.1	555	ABC transporter	95.495	555	24	1	1	554	1	555	0	1072
AZO94498.1	69	hypothetical protein D7D81_07775	QTL97425.1	69	copper chaperone	85.507	69	10	0	1	69	1	69	6.18e-39	120
AZO94500.1	386	PLP-dependent transferase	QTL98727.1	429	TIGRFAM O-acetylhomoserine O-acetylserine sulfhydrylase	33.173	416	236	6	8	381	9	424	2.55e-77	242
AZO94501.1	377	aminotransferase class I/II-fold pyridoxal phosphate-dependent enzyme	QTL98727.1	429	TIGRFAM O-acetylhomoserine O-acetylserine sulfhydrylase	32.85	414	232	7	8	377	14	425	5.63e-73	230
AZO94502.1	381	hypothetical protein D7D81_07795	QTL99580.1	374	Receptor family ligand binding region	68.194	371	116	2	13	381	4	374	0	548
AZO94503.1	829	copper-translocating P-type ATPase	QTL97439.1	829	E1-E2 ATPase	99.397	829	5	0	1	829	1	829	0	1660
AZO94504.1	91	transcriptional regulator	QTL97440.1	91	PFAM Uncharacterised BCR, COG1937	97.802	91	2	0	1	91	1	91	7.46e-62	179
AZO94505.1	195	transporter	QTL97441.1	195	Lysine exporter protein (LYSE YGGA)	98.974	195	2	0	1	195	1	195	4.33e-135	373
AZO94506.1	286	AraC family transcriptional regulator	QTL97442.1	286	COGs COG4977 Transcriptional regulator containing an amidase domain and an AraC-type DNA-binding HTH domain	100	286	0	0	1	286	1	286	0	589
AZO94507.1	419	sugar ABC transporter substrate-binding protein	QTL97481.1	458	Bacterial extracellular solute-binding protein	22.802	364	248	11	1	348	35	381	9.34e-16	75.5
AZO94508.1	306	sugar ABC transporter permease	QTM00103.1	272	PFAM binding-protein-dependent transport systems inner membrane component	36.364	275	169	3	35	306	1	272	4.62e-62	195
AZO94509.1	278	carbohydrate ABC transporter permease	QTL99954.1	253	ABC-type sugar transport system, permease component	37.743	257	147	3	31	278	1	253	9.74e-62	192
AZO94510.1	288	ketose-bisphosphate aldolase	QTL96844.1	284	fructose-1,6-bisphosphate aldolase, class II, various bacterial and amitochondriate protist	43.31	284	157	3	2	283	3	284	1.21e-78	237
AZO94511.1	266	DeoR/GlpR transcriptional regulator	QTL96727.1	252	COG1349 Transcriptional regulators of sugar metabolism	32.4	250	167	1	5	254	4	251	5.74e-39	133
AZO94513.1	279	MurR/RpiR family transcriptional regulator	QTL96741.1	284	Helix-turn-helix domain, rpiR family	26.953	256	168	5	9	250	3	253	3.68e-20	84.7
AZO94514.1	181	D-lyxose/D-mannose family sugar isomerase	QTL98180.1	180	D-lyxose ketol-isomerase	61.404	171	65	1	11	181	10	179	9.01e-78	227
AZO94516.1	273	alpha/beta hydrolase	QTL97444.1	273	PFAM alpha beta hydrolase fold	98.901	273	3	0	1	273	1	273	0	564
AZO94517.1	277	class I SAM-dependent methyltransferase	QTL97445.1	270	Methyltransferase	99.259	270	2	0	1	270	1	270	0	546
AZO94520.1	413	MFS transporter	QTL97627.1	380	Major Facilitator Superfamily	28.822	399	258	13	6	399	1	378	3.1e-30	117
AZO94521.1	124	hypothetical protein D7D81_07890	QTL97469.1	150	lactoylglutathione lyase activity	92.708	96	7	0	23	118	37	132	6.32e-63	186
AZO94522.1	103	transcriptional regulator	QTL99923.1	103	helix_turn_helix, Arsenical Resistance Operon Repressor	98.058	103	2	0	1	103	1	103	4.63e-73	209
AZO94523.1	485	glutamate--cysteine ligase	QTL97448.1	486	Glutamate-cysteine ligase	96.708	486	15	1	1	485	1	486	0	952
AZO94524.1	300	ABC transporter ATP-binding protein	QTL97449.1	300	AAA domain, putative AbiEii toxin, Type IV TA system	98.667	300	4	0	1	300	1	300	0	592
AZO94525.1	271	ABC transporter	QTL99924.1	271	ABC-2 type transporter	98.524	271	4	0	1	271	1	271	0	522
AZO94526.1	146	glyoxalase	QTL97450.1	146	glyoxalase	100	146	0	0	1	146	1	146	1.74e-106	296
AZO94527.1	217	TetR/AcrR family transcriptional regulator	QTL97451.1	217	Bacterial regulatory proteins, tetR family	98.157	217	4	0	1	217	1	217	7.01e-154	422
AZO94528.1	283	ABC transporter ATP-binding protein	QTL97452.1	283	ATPases associated with a variety of cellular activities	97.173	283	8	0	1	283	1	283	0	565
AZO94529.1	233	hypothetical protein D7D81_07930	QTL97453.1	233	hypothetical protein GM661_05380	96.996	233	7	0	1	233	1	233	4.55e-155	426
AZO94530.1	236	hypothetical protein D7D81_07935	QTL97454.1	236	ATPase, P-type transporting, HAD superfamily, subfamily IC	96.186	236	9	0	1	236	1	236	2.86e-158	435
AZO94531.1	137	Rrf2 family transcriptional regulator	QTL97456.1	137	Transcriptional regulator	97.81	137	3	0	1	137	1	137	2.42e-98	275
AZO94532.1	627	anaerobic carbon-monoxide dehydrogenase catalytic subunit	QTL97457.1	627	TIGRFAM Carbon-monoxide dehydrogenase, catalytic subunit	98.565	627	9	0	1	627	1	627	0	1265
AZO94533.1	180	4Fe-4S dicluster domain-containing protein	QTL97458.1	180	4Fe-4S dicluster domain	96.667	180	6	0	1	180	1	180	2.9e-130	359
AZO94534.1	418	NAD(P)/FAD-dependent oxidoreductase	QTL97459.1	418	Pyridine nucleotide-disulphide oxidoreductase	98.086	418	8	0	1	418	1	418	0	836
AZO94535.1	170	hypothetical protein D7D81_07960	QTL97460.1	181	hypothetical protein GM661_05415	98.802	167	2	0	1	167	1	167	7.05e-116	323
AZO94537.1	181	XRE family transcriptional regulator	QTL97461.1	171	sequence-specific DNA binding	94.152	171	10	0	11	181	1	171	5.11e-118	328
AZO94538.1	72	XRE family transcriptional regulator	QTL97462.1	72	Transcriptional regulator	100	72	0	0	1	72	1	72	7.91e-52	152
AZO94539.1	347	DctP family TRAP transporter solute-binding subunit	QTL97463.1	347	Bacterial extracellular solute-binding protein, family 7	99.135	347	3	0	1	347	1	347	0	701
AZO94540.1	170	TRAP transporter small permease	QTL97464.1	170	TRAP-type C4-dicarboxylate transport system small permease component	97.647	170	4	0	1	170	1	170	4.68e-119	330
AZO94541.1	429	TRAP transporter large permease	QTL97465.1	429	Tripartite ATP-independent periplasmic transporter, DctM component	98.834	429	5	0	1	429	1	429	0	816
AZO94542.1	402	mandelate racemase/muconate lactonizing protein	QTL97466.1	402	Catalyzes the dehydration of L-rhamnonate to 2-keto-3- deoxy-L-rhamnonate (KDR)	94.279	402	23	0	1	402	1	402	0	786
AZO94543.1	73	prevent-host-death protein	QTL97905.1	88	Antitoxin component of a toxin-antitoxin (TA) module	71.429	70	14	1	1	70	17	80	3.87e-30	98.6
AZO94544.1	544	methionine--tRNA ligase	QTL97468.1	544	Is required not only for elongation of protein synthesis but also for the initiation of all mRNA translation through initiator tRNA(fMet) aminoacylation	99.265	544	4	0	1	544	1	544	0	1117
AZO94545.1	150	VOC family protein	QTL97469.1	150	lactoylglutathione lyase activity	98.667	150	2	0	1	150	1	150	6.99e-110	305
AZO94548.1	455	hypothetical protein D7D81_08050	QTL97777.1	381	Type I restriction modification DNA specificity domain	27.577	359	223	12	57	410	22	348	2.83e-24	100
AZO94553.1	169	XRE family transcriptional regulator	QTL97480.1	163	DNA-binding helix-turn-helix protein	78.378	148	30	1	18	163	6	153	1.76e-79	230
AZO94554.1	458	ABC transporter substrate-binding protein	QTL97481.1	458	Bacterial extracellular solute-binding protein	97.162	458	13	0	1	458	1	458	0	915
AZO94555.1	294	sugar ABC transporter permease	QTL97482.1	294	PFAM binding-protein-dependent transport systems inner membrane component	98.98	294	3	0	1	294	1	294	0	583
AZO94556.1	285	carbohydrate ABC transporter permease	QTL97483.1	285	Binding-protein-dependent transport system inner membrane component	97.544	285	7	0	1	285	1	285	0	555
AZO94557.1	664	DUF4968 domain-containing protein	QTL97484.1	664	Belongs to the glycosyl hydrolase 31 family	98.343	664	11	0	1	664	1	664	0	1361
AZO94558.1	208	DUF624 domain-containing protein	QTL97485.1	208	Protein of unknown function, DUF624	97.596	208	5	0	1	208	1	208	3.56e-146	402
AZO94571.1	150	helix-turn-helix domain-containing protein	QTL97497.1	150	Psort location Cytoplasmic, score	99.333	150	1	0	1	150	1	150	2.95e-108	301
AZO94572.1	396	mandelate racemase/muconate lactonizing enzyme family protein	QTL97499.1	396	COG COG4948 L-alanine-DL-glutamate epimerase and related enzymes of enolase superfamily	98.99	396	4	0	1	396	1	396	0	820
AZO94573.1	474	APC family permease	QTL97500.1	474	Amino acid permease	99.367	474	3	0	1	474	1	474	0	930
AZO94574.1	259	threonine/serine exporter	QTL97506.1	259	hypothetical protein GM661_05670	98.842	259	3	0	1	259	1	259	0	498
AZO94575.1	145	threonine/serine exporter	QTL97507.1	145	Psort location CytoplasmicMembrane, score	97.931	145	3	0	1	145	1	145	3.06e-99	278
AZO94576.1	125	GntR family transcriptional regulator	QTL97508.1	127	GntR family	99.2	125	1	0	1	125	1	125	7.95e-89	250
AZO94577.1	242	ABC transporter ATP-binding protein	QTL97509.1	235	ABC transporter, ATP-binding protein	99.574	235	1	0	8	242	1	235	4.37e-172	470
AZO94578.1	253	hypothetical protein D7D81_08215	QTL97510.1	253	hypothetical protein GM661_05690	98.814	253	3	0	1	253	1	253	2.09e-178	487
AZO94579.1	273	hypothetical protein D7D81_08220	QTL97511.1	273	hypothetical protein GM661_05695	99.267	273	2	0	1	273	1	273	0	555
AZO94580.1	342	DctP family TRAP transporter solute-binding subunit	QTL97512.1	342	TIGRFAM TRAP dicarboxylate transporter, DctP subunit	98.83	342	4	0	1	342	1	342	0	700
AZO94581.1	175	TRAP transporter small permease	QTL97513.1	175	PFAM Tripartite ATP-independent periplasmic transporter DctQ component	92.571	175	13	0	1	175	1	175	6.99e-118	328
AZO94582.1	428	TRAP transporter large permease	QTL97514.1	428	mannitol 2-dehydrogenase activity	99.299	428	3	0	1	428	1	428	0	820
AZO94583.1	395	YgeY family selenium metabolism-linked hydrolase	QTL97515.1	395	peptidase	99.747	395	1	0	1	395	1	395	0	805
AZO94584.1	525	D-aminoacylase	QTL97516.1	525	Amidohydrolase family	99.619	525	2	0	1	525	1	525	0	1071
AZO94585.1	397	diaminopropionate ammonia-lyase	QTL97517.1	397	Pyridoxal-phosphate dependent enzyme	99.244	397	3	0	1	397	1	397	0	810
AZO94587.1	88	hypothetical protein D7D81_08270	QTL97518.1	127	hypothetical protein GM661_05730	98.837	86	1	0	1	86	1	86	4.1e-56	166
AZO94588.1	245	prevent-host-death protein	QTL97519.1	245	Putative restriction endonuclease	97.131	244	7	0	1	244	1	244	4.45e-178	486
AZO94589.1	238	DNA alkylation repair protein	QTL97520.1	238	DNA alkylation repair enzyme	99.16	238	2	0	1	238	1	238	6.47e-175	477
AZO94590.1	183	methyltransferase domain-containing protein	QTL97521.1	183	Methylase involved in ubiquinone menaquinone biosynthesis	95.628	183	8	0	1	183	1	183	2.87e-129	357
AZO94591.1	216	isoprenylcysteine carboxylmethyltransferase family protein	QTL97522.1	212	Isoprenylcysteine carboxyl methyltransferase (ICMT) family	97.642	212	5	0	5	216	1	212	1.12e-147	406
AZO94592.1	306	AraC family transcriptional regulator	QTL96666.1	282	helix_turn_helix, arabinose operon control protein	38.211	123	76	0	4	126	1	123	4.29e-24	95.9
AZO94593.1	87	hypothetical protein D7D81_08300	QTL97466.1	402	Catalyzes the dehydration of L-rhamnonate to 2-keto-3- deoxy-L-rhamnonate (KDR)	92.941	85	6	0	1	85	226	310	1.32e-54	171
AZO94594.1	230	DUF421 domain-containing protein	QTL98096.1	241	membrane	31.604	212	140	3	1	207	1	212	9.65e-29	105
AZO94596.1	67	DUF1657 domain-containing protein	QTL98912.1	79	Protein of unknown function (DUF1657)	31.818	66	45	0	1	66	1	66	8.16e-12	52
AZO94597.1	119	hypothetical protein D7D81_08320	QTL98066.1	126	hypothetical protein GM661_08805	70.635	126	30	2	1	119	1	126	3.34e-55	165
AZO94598.1	66	hypothetical protein D7D81_08325	QTL99925.1	201	dienelactone hydrolase	90.909	66	6	0	1	66	136	201	1.75e-39	125
AZO94600.1	322	DUF3231 family protein	QTL97438.1	322	DUF3231 family protein	45.57	316	171	1	6	321	7	321	2.17e-104	305
AZO94601.1	233	DUF421 domain-containing protein	QTL96675.1	203	Protein of unknown function (DUF421)	44.444	189	102	2	43	230	2	188	2.33e-50	160
AZO94602.1	217	Vat family streptogramin A O-acetyltransferase	QTL97794.1	210	transferase hexapeptide repeat	43.541	209	115	3	1	207	1	208	7.12e-57	176
AZO94603.1	255	MerR family transcriptional regulator	QTL99076.1	172	transcriptional regulator	39.216	102	58	2	3	101	2	102	1.24e-14	66.6
AZO94604.1	305	DUF2935 domain-containing protein	QTL97528.1	300	Domain of unknown function (DUF2935)	96.296	297	11	0	1	297	1	297	0	577
AZO94605.1	343	ribosome small subunit-dependent GTPase A	QTL97529.1	343	RsgA GTPase	96.793	343	11	0	1	343	1	343	0	685
AZO94606.1	203	N-acetyltransferase	QTL97530.1	203	Acetyltransferase (GNAT) family	99.507	203	1	0	1	203	1	203	2.54e-152	417
AZO94607.1	280	DNA adenine methylase	QTL97531.1	280	D12 class N6 adenine-specific DNA methyltransferase	97.857	280	6	0	1	280	1	280	0	562
AZO94608.1	208	hypothetical protein D7D81_08390	QTL97533.1	208	homoserine transmembrane transporter activity	99.038	208	2	0	1	208	1	208	1.55e-142	393
AZO94609.1	216	3,4-dihydroxy-2-butanone-4-phosphate synthase	QTL97535.1	216	3,4-dihydroxy-2-butanone 4-phosphate synthase	98.148	216	4	0	1	216	1	216	9.46e-159	434
AZO94610.1	99	class I SAM-dependent methyltransferase	QTL97536.1	248	Thiopurine S-methyltransferase (TPMT)	98.99	99	1	0	1	99	1	99	7.11e-68	200
AZO94611.1	125	DUF3795 domain-containing protein	QTL97537.1	125	DUF3795 domain-containing protein	97.6	125	3	0	1	125	1	125	1.41e-88	249
AZO94612.1	205	protein rhiA	QTL97540.1	205	protein rhiA	98.537	205	3	0	1	205	1	205	2.09e-149	410
AZO94613.1	205	hypothetical protein D7D81_08420	QTL97541.1	205	hypothetical protein GM661_05865	99.512	205	1	0	1	205	1	205	6.17e-152	416
AZO94614.1	38	sigma-70 family RNA polymerase sigma factor	QTL99929.1	38	hypothetical protein GM661_05870	100	38	0	0	1	38	1	38	3.7e-22	75.5
AZO94615.1	144	helix-turn-helix domain-containing protein	QTL97542.1	144	RNA polymerase sigma factor, sigma-70 family	98.611	144	2	0	1	144	1	144	3.06e-100	280
AZO94616.1	81	hypothetical protein D7D81_08435	QTL97902.1	84	hypothetical protein GM661_07860	33.735	83	49	2	1	77	1	83	1.29e-11	52
AZO94617.1	258	MBL fold metallo-hydrolase	QTL97543.1	258	Metallo-beta-lactamase superfamily	98.45	258	4	0	1	258	1	258	0	515
AZO94618.1	183	hypothetical protein D7D81_08455	QTL97544.1	186	Probably functions as a manganese efflux pump	96.721	183	6	0	1	183	1	183	3.72e-121	337
AZO94619.1	156	hypothetical protein D7D81_08460	QTL97545.1	156	-	96.795	156	5	0	1	156	1	156	9.42e-105	293
AZO94621.1	155	peroxiredoxin	QTL97136.1	215	Thiol-specific peroxidase that catalyzes the reduction of hydrogen peroxide and organic hydroperoxides to water and alcohols, respectively. Plays a role in cell protection against oxidative stress by detoxifying peroxides	27.273	154	106	3	6	154	10	162	7.16e-14	63.2
AZO94622.1	665	hypothetical protein D7D81_08485	QTL97549.1	665	DNA helicase	98.045	665	13	0	1	665	1	665	0	1335
AZO94623.1	742	ATP-dependent helicase	QTL97550.1	742	PFAM UvrD REP helicase	97.17	742	21	0	1	742	1	742	0	1482
AZO94624.1	270	PD-(D/E)XK nuclease family protein	QTL97551.1	270	PD-(D/E)XK nuclease superfamily	98.519	270	4	0	1	270	1	270	0	542
AZO94625.1	765	single-stranded-DNA-specific exonuclease RecJ	QTL97552.1	765	Single-stranded-DNA-specific exonuclease RecJ	96.863	765	24	0	1	765	1	765	0	1504
AZO94626.1	232	mutarotase	QTL97553.1	232	Hydrolyzes RNA 2',3'-cyclic phosphodiester to an RNA 2'- phosphomonoester	98.707	232	3	0	1	232	1	232	1.54e-173	473
AZO94627.1	102	PadR family transcriptional regulator	QTL97554.1	102	transcriptional regulator, PadR family	99.02	102	1	0	1	102	1	102	3.42e-72	206
AZO94628.1	92	hypothetical protein D7D81_08515	QTL97555.1	497	hypothetical protein GM661_05945	100	85	0	0	1	85	1	85	8.91e-55	173
AZO94629.1	69	hypothetical protein D7D81_08520	QTL97560.1	367	Uncharacterized protein conserved in bacteria C-term(DUF2220)	97.015	67	2	0	1	67	299	365	1.6e-40	132
AZO94630.1	88	hypothetical protein D7D81_08535	QTL97561.1	88	hypothetical protein GM661_05985	100	88	0	0	1	88	1	88	8.62e-62	179
AZO94631.1	120	DUF2089 domain-containing protein	QTL97562.1	120	Protein of unknown function (DUF2089)	100	120	0	0	1	120	1	120	1.06e-84	239
AZO94632.1	128	hypothetical protein D7D81_08545	QTL97563.1	128	hypothetical protein GM661_05995	99.219	128	1	0	1	128	1	128	5.89e-87	246
AZO94633.1	230	DNA/RNA nuclease SfsA	QTL97564.1	55	hypothetical protein GM661_06000	100	55	0	0	176	230	1	55	1.45e-34	114
AZO94634.1	173	LysM peptidoglycan-binding domain-containing protein	QTL98285.1	353	Cell Wall Hydrolase	35.849	159	88	5	12	170	79	223	2.8e-25	96.7
AZO94634.1	173	LysM peptidoglycan-binding domain-containing protein	QTL98285.1	353	Cell Wall Hydrolase	33.913	115	65	4	60	172	68	173	1.68e-14	66.6
AZO94634.1	173	LysM peptidoglycan-binding domain-containing protein	QTL98285.1	353	Cell Wall Hydrolase	32.71	107	64	4	11	116	128	227	2.94e-12	60.5
AZO94635.1	67	cold-shock protein	QTL97566.1	67	Cold shock protein	100	67	0	0	1	67	1	67	3.61e-45	135
AZO94636.1	420	MFS transporter	QTL97567.1	420	Transporter, major facilitator family protein	97.619	420	10	0	1	420	1	420	0	816
AZO94637.1	198	spore coat protein	QTL97568.1	198	PFAM Coat F domain	99.495	198	1	0	1	198	1	198	2.97e-149	409
AZO94638.1	273	diguanylate cyclase	QTL97569.1	273	diguanylate cyclase	100	273	0	0	1	273	1	273	0	544
AZO94639.1	923	DUF4145 domain-containing protein	QTL97570.1	923	DUF4145 domain-containing protein	99.567	923	4	0	1	923	1	923	0	1896
AZO94640.1	294	sulfide/dihydroorotate dehydrogenase-like FAD/NAD-binding protein	QTL98515.1	277	Iron-sulfur cluster binding domain of dihydroorotate dehydrogenase B	54.11	292	119	2	1	292	1	277	1.62e-114	328
AZO94641.1	464	NADPH-dependent glutamate synthase	QTL98514.1	468	TIGRFAM glutamate synthase (NADPH), homotetrameric	65.727	461	152	3	8	464	4	462	0	621
AZO94642.1	352	NAD(P)-dependent alcohol dehydrogenase	QTL97571.1	352	PFAM Alcohol dehydrogenase, zinc-binding	100	352	0	0	1	352	1	352	0	718
AZO94643.1	197	response regulator	QTL97572.1	197	response regulator	100	197	0	0	1	197	1	197	3.54e-143	393
AZO94644.1	486	ethanolamine ammonia-lyase	QTL97573.1	486	PFAM Ethanolamine utilisation	99.794	486	1	0	1	486	1	486	0	966
AZO94645.1	460	ethanolamine ammonia-lyase subunit EutB	QTL97574.1	460	PFAM Ethanolamine ammonia lyase large subunit	100	460	0	0	1	460	1	460	0	953
AZO94646.1	262	ethanolamine ammonia-lyase subunit EutC	QTL97575.1	262	Belongs to the EutC family	99.237	262	2	0	1	262	1	262	0	533
AZO94647.1	479	histidine kinase	QTL97576.1	479	Histidine kinase	98.539	479	7	0	1	479	1	479	0	952
AZO94648.1	475	APC family permease	QTL97577.1	475	amino acid permease	99.579	475	2	0	1	475	1	475	0	951
AZO94649.1	257	bifunctional demethylmenaquinone methyltransferase/2-methoxy-6-polyprenyl-1,4-benzoquinol methylase UbiE	QTL97578.1	257	Methyltransferase required for the conversion of demethylmenaquinol (DMKH2) to menaquinol (MKH2)	97.276	257	7	0	1	257	1	257	0	523
AZO94650.1	160	prolyl-tRNA synthetase associated domain-containing protein	QTL97579.1	160	PFAM YbaK prolyl-tRNA synthetase associated region	99.375	160	1	0	1	160	1	160	7.3e-115	319
AZO94651.1	205	LysE family translocator	QTL97581.1	205	homoserine transmembrane transporter activity	98.049	205	4	0	1	205	1	205	9.02e-140	385
AZO94652.1	149	hypothetical protein D7D81_08645	QTL97582.1	149	hypothetical protein GM661_06090	100	149	0	0	1	149	1	149	4.82e-105	293
AZO94653.1	120	ArsR family transcriptional regulator	QTL97583.1	120	regulatory protein, arsR	99.167	120	1	0	1	120	1	120	7.3e-84	237
AZO94655.1	214	ATP-binding cassette domain-containing protein	QTL98900.1	233	Belongs to the ABC transporter superfamily	33.5	200	123	4	12	206	19	213	1.86e-34	119
AZO94656.1	172	transcription repressor NadR	QTL97585.1	170	3H domain	96.471	170	6	0	1	170	1	170	8.85e-121	335
AZO94657.1	79	hypothetical protein D7D81_08675	QTL97586.1	79	amino acid permease	91.139	79	7	0	1	79	1	79	8.23e-48	143
AZO94658.1	82	hypothetical protein D7D81_08685	QTL97588.1	82	hypothetical protein GM661_06110	95.122	82	4	0	1	82	1	82	9.17e-35	110
AZO94659.1	104	YbjQ family protein	QTL97589.1	104	Belongs to the UPF0145 family	100	104	0	0	1	104	1	104	8.03e-71	203
AZO94660.1	212	lactate utilization protein	QTL97590.1	212	LUD domain	96.226	212	8	0	1	212	1	212	2.82e-154	423
AZO94661.1	211	TetR/AcrR family transcriptional regulator	QTL97591.1	211	TetR family transcriptional regulator	96.682	211	7	0	1	211	1	211	1.22e-148	408
AZO94662.1	326	hypothetical protein D7D81_08705	QTL97592.1	326	CoA enzyme activase uncharacterised domain (DUF2229)	99.08	326	3	0	1	326	1	326	0	666
AZO94663.1	369	hypothetical protein D7D81_08710	QTL97593.1	369	PFAM CoA enzyme activase uncharacterised domain (DUF2229)	99.729	369	1	0	1	369	1	369	0	750
AZO94664.1	332	2-hydroxyglutaryl-CoA dehydratase	QTL97594.1	332	PFAM ATPase, BadF BadG BcrA BcrD type	99.096	332	3	0	1	332	1	332	0	673
AZO94665.1	110	hypothetical protein D7D81_08720	QTL97595.1	110	hypothetical protein GM661_06155	98.182	110	2	0	1	110	1	110	1.23e-76	218
AZO94666.1	466	[FeFe] hydrogenase H-cluster radical SAM maturase HydG	QTL97596.1	466	Biotin and Thiamin Synthesis associated	99.142	466	4	0	1	466	1	466	0	956
AZO94667.1	354	[FeFe] hydrogenase H-cluster radical SAM maturase HydE	QTL97597.1	354	PFAM Radical SAM	98.006	351	7	0	1	351	1	351	0	705
AZO94668.1	84	iron-only hydrogenase system regulator	QTL97598.1	84	Iron-only hydrogenase system regulator	96.429	84	3	0	1	84	1	84	1.23e-53	158
AZO94669.1	72	hypothetical protein D7D81_08740	QTL97599.1	61	hypothetical protein GM661_06175	98.305	59	1	0	1	59	1	59	1.97e-36	113
AZO94670.1	161	flavin reductase family protein	QTL97600.1	161	flavin reductase	99.379	161	1	0	1	161	1	161	1.09e-117	326
AZO94671.1	156	transcriptional repressor	QTL97601.1	156	Belongs to the Fur family	98.718	156	2	0	1	156	1	156	3.16e-114	317
AZO94672.1	117	dinitrogenase iron-molybdenum cofactor biosynthesis protein	QTM00105.1	122	PFAM Dinitrogenase iron-molybdenum cofactor	46.491	114	59	2	1	113	1	113	1.03e-29	100
AZO94673.1	707	helicase	QTL97602.1	707	DNA helicase	98.444	707	11	0	1	707	1	707	0	1442
AZO94674.1	285	GNAT family N-acetyltransferase	QTL97603.1	285	Transcriptional regulator	96.14	285	11	0	1	285	1	285	0	564
AZO94675.1	379	GntR family transcriptional regulator	QTL97604.1	358	PFAM regulatory protein GntR HTH	98.603	358	5	0	22	379	1	358	0	717
AZO94676.1	502	sugar ABC transporter ATP-binding protein	QTL97605.1	502	Part of an ABC transporter complex involved in carbohydrate import. Could be involved in ribose, galactose and or methyl galactoside import. Responsible for energy coupling to the transport system	99.801	502	1	0	1	502	1	502	0	1009
AZO94677.1	322	ABC transporter permease	QTL97606.1	322	Belongs to the binding-protein-dependent transport system permease family	100	322	0	0	1	322	1	322	0	624
AZO94678.1	327	sugar ABC transporter substrate-binding protein	QTL97607.1	327	Periplasmic binding protein LacI transcriptional regulator	99.694	327	1	0	1	327	1	327	0	662
AZO94679.1	228	L-ribulose-5-phosphate 4-epimerase	QTL97608.1	228	Class II Aldolase and Adducin N-terminal domain	99.561	228	1	0	1	228	1	228	8.22e-173	471
AZO94680.1	496	L-arabinose isomerase	QTL97609.1	496	Catalyzes the conversion of L-arabinose to L-ribulose	98.79	496	6	0	1	496	1	496	0	1017
AZO94681.1	535	ATPase	QTL97610.1	535	Carbohydrate kinase, FGGY family protein	99.439	535	3	0	1	535	1	535	0	1097
AZO94682.1	611	ATP-binding cassette domain-containing protein	QTL97611.1	434	HWE histidine kinase	99.307	433	3	0	1	433	1	433	0	866
AZO94683.1	194	response regulator	QTL99607.1	195	ANTAR	55.155	194	87	0	1	194	1	194	2.76e-73	216
AZO94684.1	503	sugar ABC transporter ATP-binding protein	QTL99708.1	509	import. Responsible for energy coupling to the transport system	62.777	497	183	1	2	496	4	500	0	625
AZO94685.1	324	ABC transporter permease	QTL99707.1	326	Branched-chain amino acid transport system / permease component	69.592	319	97	0	6	324	7	325	1.38e-162	453
AZO94686.1	358	erythritol/L-threitol dehydrogenase	QTL99544.1	357	TIGRFAM 2-desacetyl-2-hydroxyethyl bacteriochlorophyllide A dehydrogenase	53.631	358	160	4	4	358	3	357	1.11e-141	403
AZO94687.1	260	HAD family phosphatase	QTL97612.1	260	HAD-superfamily hydrolase, subfamily IIB	96.923	260	8	0	1	260	1	260	0	506
AZO94688.1	80	hypothetical protein D7D81_08840	QTL97608.1	228	Class II Aldolase and Adducin N-terminal domain	63.38	71	26	0	3	73	154	224	2.75e-28	98.2
AZO94689.1	357	sugar ABC transporter substrate-binding protein	QTL96592.1	323	ABC-type sugar transport system periplasmic component	29.032	279	188	5	24	300	21	291	5.45e-27	105
AZO94690.1	501	sugar ABC transporter ATP-binding protein	QTL98178.1	495	Part of the ABC transporter complex RbsABC involved in ribose import. Responsible for energy coupling to the transport system	38.211	492	296	6	3	491	2	488	9.02e-110	332
AZO94690.1	501	sugar ABC transporter ATP-binding protein	QTL98178.1	495	Part of the ABC transporter complex RbsABC involved in ribose import. Responsible for energy coupling to the transport system	28.287	251	164	8	256	498	2	244	5.88e-19	86.3
AZO94691.1	330	ABC transporter permease	QTL96634.1	312	Belongs to the binding-protein-dependent transport system permease family	37.013	308	194	0	20	327	5	312	3.03e-51	169
AZO94692.1	257	SDR family oxidoreductase	QTL99706.1	260	PFAM Short-chain dehydrogenase reductase SDR	51.172	256	121	2	4	255	3	258	7.7e-90	263
AZO94693.1	632	HAMP domain-containing protein	QTL97311.1	949	Histidine kinase-, DNA gyrase B-, and HSP90-like ATPase	33.831	402	232	8	233	625	569	945	1.26e-56	203
AZO94694.1	634	sensor histidine kinase	QTL97311.1	949	Histidine kinase-, DNA gyrase B-, and HSP90-like ATPase	31.833	622	365	16	24	623	365	949	1.39e-67	234
AZO94695.1	547	response regulator	QTL97312.1	531	helix_turn_helix, arabinose operon control protein	33.214	560	324	14	2	546	6	530	9.02e-81	259
AZO94696.1	607	TonB-dependent receptor	QTL97613.1	607	TonB-dependent Receptor Plug	96.54	607	21	0	1	607	1	607	0	1211
AZO94697.1	438	TonB family protein	QTL97614.1	398	TIGRFAM TonB family protein	91.729	399	31	2	41	438	1	398	0	685
AZO94698.1	218	MotA/TolQ/ExbB proton channel family protein	QTL97615.1	218	PFAM MotA TolQ ExbB proton channel	99.541	218	1	0	1	218	1	218	1.02e-159	437
AZO94699.1	132	biopolymer transporter ExbD	QTL97616.1	134	PFAM Biopolymer transport protein ExbD TolR	71.212	132	38	0	1	132	1	132	2.53e-67	196
AZO94700.1	348	chemotaxis protein	QTL98815.1	405	Sensory domain found in PocR	40.116	172	92	4	14	178	3	170	1.98e-30	116
AZO94701.1	383	DNA repair exonuclease	QTL97617.1	383	Calcineurin-like phosphoesterase superfamily domain	99.217	383	3	0	1	383	1	383	0	778
AZO94702.1	809	hypothetical protein D7D81_08915	QTL97618.1	809	AAA domain	98.764	809	10	0	1	809	1	809	0	1603
AZO94703.1	873	PD-(D/E)XK nuclease family protein	QTL97619.1	873	PD-(D/E)XK nuclease superfamily	98.855	873	10	0	1	873	1	873	0	1738
AZO94704.1	1035	DNA helicase UvrD	QTL97620.1	1035	Belongs to the helicase family. UvrD subfamily	98.551	1035	15	0	1	1035	1	1035	0	2058
AZO94705.1	190	hypothetical protein D7D81_08930	QTL97621.1	190	hypothetical protein GM661_06295	97.368	190	5	0	1	190	1	190	4.14e-137	377
AZO94706.1	443	MATE family efflux transporter	QTL97622.1	443	MatE	99.774	443	1	0	1	443	1	443	0	872
AZO94707.1	86	stage V sporulation protein S	QTL97623.1	86	stage v sporulation protein s	100	86	0	0	1	86	1	86	1.04e-57	168
AZO94708.1	423	aminotransferase class I/II-fold pyridoxal phosphate-dependent enzyme	QTL97624.1	423	Alanine-glyoxylate amino-transferase	98.109	423	8	0	1	423	1	423	0	865
AZO94709.1	241	DUF1385 domain-containing protein	QTL97625.1	241	Protein of unknown function (DUF1385)	97.925	241	5	0	1	241	1	241	3.43e-174	475
AZO94710.1	269	HAD family phosphatase	QTL97626.1	269	Sucrose-6F-phosphate phosphohydrolase	99.257	269	2	0	1	269	1	269	0	549
AZO94711.1	380	MFS transporter	QTL97627.1	380	Major Facilitator Superfamily	98.947	380	4	0	1	380	1	380	0	738
AZO94712.1	324	ABC transporter ATP-binding protein	QTL97628.1	324	PFAM ABC transporter related	97.222	324	9	0	1	324	1	324	0	639
AZO94714.1	360	NCS2 family permease	QTL97630.1	360	secondary active sulfate transmembrane transporter activity	98.611	360	5	0	1	360	1	360	0	694
AZO94715.1	187	adenine phosphoribosyltransferase	QTL97631.1	187	Phosphoribosyl transferase domain	99.465	187	1	0	1	187	1	187	6.49e-138	379
AZO94716.1	603	YgiQ family radical SAM protein	QTL97632.1	603	UPF0313 protein	94.362	603	34	0	1	603	1	603	0	1193
AZO94717.1	381	aminotransferase class V-fold PLP-dependent enzyme	QTL99958.1	391	Master enzyme that delivers sulfur to a number of partners involved in Fe-S cluster assembly, tRNA modification or cofactor biosynthesis. Catalyzes the removal of elemental sulfur atoms from cysteine to produce alanine. Functions as a sulfur delivery protein for Fe-S cluster synthesis onto IscU, an Fe-S scaffold assembly protein, as well as other S acceptor proteins	32	400	229	14	2	381	6	382	7.15e-48	164
AZO94726.1	300	phosphate ABC transporter substrate-binding protein	QTL99478.1	269	TIGRFAM phosphate binding protein	28.03	264	168	5	38	297	21	266	1.63e-29	110
AZO94727.1	283	phosphate ABC transporter permease subunit PstC	QTL99477.1	295	probably responsible for the translocation of the substrate across the membrane	41.418	268	149	3	13	276	14	277	2.42e-69	213
AZO94728.1	276	ABC transporter permease subunit	QTL99476.1	289	PFAM Binding-protein-dependent transport system inner membrane component	35.385	260	159	4	18	271	25	281	8.36e-43	144
AZO94729.1	260	2-hydroxyglutaryl-CoA dehydratase	QTL98477.1	319	PFAM BadF BadG BcrA BcrD ATPase family	32.184	261	167	6	2	255	4	261	1.93e-27	104
AZO94731.1	636	selenocysteine-specific translation elongation factor	QTL99316.1	397	This protein promotes the GTP-dependent binding of aminoacyl-tRNA to the A-site of ribosomes during protein biosynthesis	30.749	387	224	15	7	356	15	394	1.31e-37	141
AZO94732.1	293	LysR family transcriptional regulator	QTL99880.1	297	LysR substrate binding domain	29.749	279	193	1	1	279	1	276	3.26e-35	125
AZO94736.1	484	BCCT family transporter	QTL99931.1	541	Belongs to the BCCT transporter (TC 2.A.15) family	38.925	465	252	9	39	480	54	509	1.1e-108	330
AZO94738.1	400	thioredoxin-disulfide reductase	QTL96641.1	311	Belongs to the class-II pyridine nucleotide-disulfide oxidoreductase family	41.584	303	163	7	10	306	14	308	6.21e-62	199
AZO94739.1	105	thioredoxin	QTL96834.1	105	Belongs to the thioredoxin family	40.698	86	50	1	4	89	7	91	1.47e-18	71.2
AZO94742.1	158	ferritin-like domain-containing protein	QTL97633.1	158	PFAM Ubiquinone biosynthesis protein COQ7	99.367	158	1	0	1	158	1	158	4.09e-115	319
AZO94743.1	73	hypothetical protein D7D81_09140	QTL97634.1	73	hypothetical protein GM661_06365	95.89	73	3	0	1	73	1	73	2.48e-47	141
AZO94744.1	124	lactoylglutathione lyase	QTL97635.1	124	TIGRFAM lactoylglutathione lyase	98.387	124	2	0	1	124	1	124	4.45e-89	251
AZO94745.1	622	ATP-binding cassette domain-containing protein	QTL97636.1	620	HWE histidine kinase	98.875	622	5	1	1	622	1	620	0	1228
AZO94747.1	199	response regulator	QTL97637.1	199	PFAM response regulator receiver	98.492	199	3	0	1	199	1	199	1.37e-141	389
AZO94748.1	329	sugar ABC transporter substrate-binding protein	QTL97638.1	329	Periplasmic binding protein domain	99.696	329	1	0	1	329	1	329	0	671
AZO94749.1	323	ABC transporter permease	QTL97639.1	323	Branched-chain amino acid transport system / permease component	99.69	323	1	0	1	323	1	323	0	615
AZO94750.1	275	transketolase	QTL97640.1	275	COG3959 Transketolase, N-terminal subunit	98.182	275	5	0	1	275	1	275	0	558
AZO94751.1	315	transketolase family protein	QTL97641.1	312	Transketolase	98.706	309	4	0	1	309	1	309	0	621
AZO94752.1	133	hypothetical protein D7D81_09190	QTL97642.1	133	Putative ABC-transporter type IV	92.481	133	10	0	1	133	1	133	2.55e-89	252
AZO94753.1	498	threonine synthase	QTL97643.1	498	TIGRFAM threonine synthase	98.594	498	7	0	1	498	1	498	0	1018
AZO94754.1	378	M48 family peptidase	QTL97644.1	379	PFAM peptidase	97.34	376	10	0	1	376	1	376	0	728
AZO94755.1	968	PRD domain-containing protein	QTL97645.1	969	system, fructose subfamily, IIA component	98.657	968	13	0	1	968	1	968	0	1918
AZO94757.1	173	YjbQ family protein	QTL99591.1	138	Uncharacterised protein family UPF0047	27.746	173	90	7	1	173	1	138	2.15e-13	60.8
AZO94758.1	93	PTS galactitol transporter subunit IIB	QTL97647.1	97	PFAM phosphotransferase system lactose cellobiose-specific IIB subunit	38.202	89	51	2	2	88	5	91	7.81e-14	58.5
AZO94759.1	453	PTS sugar transporter subunit IIC	QTL99586.1	420	system Galactitol-specific IIC component	44.31	413	225	3	9	417	5	416	1.09e-117	348
AZO94761.1	225	class II aldolase/adducin family protein	QTL96637.1	212	PFAM Class II Aldolase	32.258	186	125	1	6	190	5	190	3.85e-29	105
AZO94763.1	159	PTS sugar transporter subunit IIA	QTL97646.1	154	phosphoenolpyruvate-dependent sugar phosphotransferase system, EIIA 2	75	152	38	0	7	158	1	152	2.78e-79	229
AZO94764.1	90	HPr family phosphocarrier protein	QTL97649.1	90	TIGRFAM Phosphotransferase System HPr (HPr) Family	98.889	90	1	0	1	90	1	90	5.02e-60	174
AZO94765.1	573	phosphoenolpyruvate--protein phosphotransferase	QTL97650.1	572	General (non sugar-specific) component of the phosphoenolpyruvate-dependent sugar phosphotransferase system (sugar PTS). This major carbohydrate active-transport system catalyzes the phosphorylation of incoming sugar substrates concomitantly with their translocation across the cell membrane. Enzyme I transfers the phosphoryl group from phosphoenolpyruvate (PEP) to the phosphoryl carrier protein (…	97.552	572	14	0	2	573	1	572	0	1135
AZO94769.1	277	transketolase	QTL99448.1	278	PFAM Transketolase, thiamine diphosphate binding domain	43.145	248	140	1	2	248	3	250	2.22e-67	207
AZO94770.1	740	transcription antiterminator	QTL99776.1	281	transcriptional antiterminator	28.641	206	131	6	215	418	83	274	1.38e-13	68.6
AZO94771.1	91	HPr family phosphocarrier protein	QTL97649.1	90	TIGRFAM Phosphotransferase System HPr (HPr) Family	76.667	90	21	0	1	90	1	90	2.49e-45	137
AZO94772.1	573	phosphoenolpyruvate--protein phosphotransferase	QTL97650.1	572	General (non sugar-specific) component of the phosphoenolpyruvate-dependent sugar phosphotransferase system (sugar PTS). This major carbohydrate active-transport system catalyzes the phosphorylation of incoming sugar substrates concomitantly with their translocation across the cell membrane. Enzyme I transfers the phosphoryl group from phosphoenolpyruvate (PEP) to the phosphoryl carrier protein (…	91.608	572	48	0	2	573	1	572	0	1074
AZO94773.1	82	hypothetical protein D7D81_09305	QTL99658.1	252	Transposase	47.945	73	37	1	1	73	57	128	1.96e-18	73.2
AZO94775.1	149	DUF1835 domain-containing protein	QTL97809.1	326	Domain of unknown function (DUF1835)	26.846	149	98	4	3	142	68	214	1.06e-11	57.8
AZO94776.1	453	MATE family efflux transporter	QTL97402.1	470	Polysaccharide biosynthesis C-terminal domain	25.722	381	269	7	12	380	15	393	2.94e-30	119
AZO94780.1	63	hypothetical protein D7D81_09345	QTL97653.1	64	hypothetical protein GM661_06470	95.238	63	3	0	1	63	1	63	2.34e-39	120
AZO94781.1	401	LysM peptidoglycan-binding domain-containing protein	QTL97654.1	401	PFAM Polysaccharide deacetylase	95.511	401	18	0	1	401	1	401	0	747
AZO94782.1	141	CBS domain-containing protein	QTL97655.1	141	Domain in cystathionine beta-synthase and other proteins.	99.291	141	1	0	1	141	1	141	4.23e-100	280
AZO94783.1	297	sensor histidine kinase	QTL97656.1	297	Histidine kinase-, DNA gyrase B-, and HSP90-like ATPase	98.653	297	4	0	1	297	1	297	0	581
AZO94784.1	167	gamma carbonic anhydrase family protein	QTL97657.1	167	COG0663 Carbonic anhydrases acetyltransferases, isoleucine patch superfamily	98.204	167	3	0	1	167	1	167	1.25e-117	326
AZO94785.1	156	hypothetical protein D7D81_09375	QTL97658.1	156	hypothetical protein GM661_06500	98.718	156	2	0	1	156	1	156	2.04e-108	302
AZO94786.1	62	small, acid-soluble spore protein, alpha/beta type	QTL97659.1	62	Small, acid-soluble spore proteins, alpha/beta type	100	62	0	0	1	62	1	62	2.77e-39	120
AZO94787.1	199	nicotinate-nucleotide adenylyltransferase	QTL97660.1	199	Catalyzes the reversible adenylation of nicotinate mononucleotide (NaMN) to nicotinic acid adenine dinucleotide (NaAD)	98.995	199	2	0	1	199	1	199	3.4e-147	404
AZO94788.1	203	HD domain-containing protein	QTL97661.1	203	PFAM metal-dependent phosphohydrolase HD sub domain	98.522	203	3	0	1	203	1	203	1.37e-146	402
AZO94789.1	398	LytR family transcriptional regulator	QTL97662.1	398	TIGRFAM cell envelope-related function transcriptional attenuator	98.995	398	4	0	1	398	1	398	0	803
AZO94790.1	117	ribosome silencing factor	QTL97663.1	117	Functions as a ribosomal silencing factor. Interacts with ribosomal protein L14 (rplN), blocking formation of intersubunit bridge B8. Prevents association of the 30S and 50S ribosomal subunits and the formation of functional ribosomes, thus repressing translation	98.291	117	2	0	1	117	1	117	7.46e-83	234
AZO94791.1	830	leucine--tRNA ligase	QTL97664.1	830	Belongs to the class-I aminoacyl-tRNA synthetase family	99.157	830	7	0	1	830	1	830	0	1711
AZO94792.1	96	thioredoxin	QTL97665.1	96	thioredoxin	97.917	96	2	0	1	96	1	96	1.66e-65	189
AZO94793.1	270	ATP-dependent sacrificial sulfur transferase LarE	QTL97666.1	270	Asparagine synthase	96.296	270	10	0	1	270	1	270	0	530
AZO94794.1	246	aquaporin family protein	QTL97667.1	246	Belongs to the MIP aquaporin (TC 1.A.8) family	99.187	246	2	0	1	246	1	246	1.14e-176	482
AZO94795.1	497	glycerol kinase	QTL97668.1	497	Key enzyme in the regulation of glycerol uptake and metabolism. Catalyzes the phosphorylation of glycerol to yield sn- glycerol 3-phosphate	99.195	497	4	0	1	497	1	497	0	1015
AZO94796.1	502	FAD/NAD(P)-binding oxidoreductase	QTL97669.1	502	BFD domain protein 2Fe-2S -binding domain protein	98.805	502	6	0	1	502	1	502	0	1012
AZO94797.1	428	FAD-binding protein	QTL97670.1	428	PFAM FAD-dependent pyridine nucleotide-disulphide oxidoreductase	98.131	428	8	0	1	428	1	428	0	848
AZO94798.1	123	DUF1667 domain-containing protein	QTL97671.1	123	Protein of unknown function (DUF1667)	99.187	123	1	0	1	123	1	123	5.69e-88	248
AZO94799.1	188	glycerol-3-phosphate responsive antiterminator	QTL97672.1	188	PFAM Glycerol-3-phosphate responsive antiterminator	100	188	0	0	1	188	1	188	8.53e-138	379
AZO94800.1	341	LacI family transcriptional regulator	QTL97673.1	341	purine nucleotide biosynthetic process	98.534	341	5	0	1	341	1	341	0	684
AZO94801.1	287	ABC transporter permease	QTL99186.1	287	PFAM binding-protein-dependent transport systems inner membrane component	99.303	287	2	0	1	287	1	287	0	577
AZO94802.1	447	beta-glucosidase	QTL99183.1	450	PFAM Glycosyl hydrolase family 1	94.855	447	23	0	1	447	1	447	0	887
AZO94803.1	827	glycoside hydrolase family 2 protein	QTL97675.1	192	Glycosyl hydrolases family 2	97.396	192	5	0	444	635	1	192	1.47e-138	405
AZO94804.1	742	alpha-galactosidase	QTL97024.1	729	PFAM Glycoside hydrolase, clan GH-D	59.865	740	286	2	1	740	1	729	0	932
AZO94805.1	400	N-acyl-D-glucosamine 2-epimerase	QTL97679.1	113	Catalyzes the reversible epimerization of cellobiose to 4-O-beta-D-glucopyranosyl-D-mannose (Glc-Man)	95.495	111	5	0	1	111	1	111	2.67e-71	216
AZO94806.1	235	dethiobiotin synthase	QTL97680.1	235	Catalyzes a mechanistically unusual reaction, the ATP- dependent insertion of CO2 between the N7 and N8 nitrogen atoms of 7,8-diaminopelargonic acid (DAPA) to form an ureido ring	95.319	235	11	0	1	235	1	235	4.3e-168	459
AZO94807.1	448	adenosylmethionine--8-amino-7-oxononanoate transaminase	QTL97681.1	448	Catalyzes the transfer of the alpha-amino group from S- adenosyl-L-methionine (SAM) to 7-keto-8-aminopelargonic acid (KAPA) to form 7,8-diaminopelargonic acid (DAPA). It is the only animotransferase known to utilize SAM as an amino donor	98.214	448	8	0	1	448	1	448	0	916
AZO94808.1	166	hypothetical protein D7D81_09500	QTL97682.1	166	hypothetical protein GM661_06625	97.59	166	4	0	1	166	1	166	2.48e-113	315
AZO94809.1	259	6-carboxyhexanoate--CoA ligase	QTL97683.1	265	6-carboxyhexanoate--CoA ligase	96.109	257	10	0	1	257	1	257	0	513
AZO94810.1	387	8-amino-7-oxononanoate synthase	QTL97684.1	387	Aminotransferase class I and II	96.899	387	12	0	1	387	1	387	0	768
AZO94811.1	73	ferrous iron transport protein A	QTL97720.1	73	PFAM FeoA domain	100	73	0	0	1	73	1	73	1.31e-49	147
AZO94812.1	619	ferrous iron transport protein B	QTL97721.1	619	transporter of a GTP-driven Fe(2 ) uptake system	98.708	619	8	0	1	619	1	619	0	1228
AZO94813.1	147	sigma E positive regulator RseC/MucC	QTL97722.1	147	PFAM Positive regulator of sigma(E) RseC MucC	97.959	147	3	0	1	147	1	147	6.56e-106	295
AZO94814.1	184	XRE family transcriptional regulator	QTL97723.1	184	PFAM Cupin	95.652	184	8	0	1	184	1	184	2.95e-131	362
AZO94815.1	247	branched-chain amino acid ABC transporter permease	QTL97724.1	247	TIGRFAM 4-azaleucine resistance	95.951	247	10	0	1	247	1	247	7.32e-160	440
AZO94816.1	100	AzlD domain-containing protein	QTL97725.1	100	branched-chain amino acid	99	100	1	0	1	100	1	100	3.91e-67	193
AZO94817.1	198	GTP cyclohydrolase I FolE	QTL97734.1	198	GTP cyclohydrolase I	100	198	0	0	1	198	1	198	1.65e-148	407
AZO94818.1	272	dihydropteroate synthase	QTL97735.1	272	dihydropteroate synthase	98.897	272	3	0	1	272	1	272	0	547
AZO94819.1	126	dihydroneopterin aldolase	QTL97736.1	126	Catalyzes the conversion of 7,8-dihydroneopterin to 6- hydroxymethyl-7,8-dihydropterin	100	126	0	0	1	126	1	126	1.9e-93	262
AZO94820.1	162	2-amino-4-hydroxy-6-hydroxymethyldihydropteridine diphosphokinase	QTL97737.1	162	Catalyzes the conversion of 7,8-dihydroneopterin to 6- hydroxymethyl-7,8-dihydropterin	97.531	162	4	0	1	162	1	162	6.56e-118	327
AZO94821.1	165	dihydrofolate reductase	QTL97738.1	165	Key enzyme in folate metabolism. Catalyzes an essential reaction for de novo glycine and purine synthesis, and for DNA precursor synthesis	100	165	0	0	1	165	1	165	3.37e-121	335
AZO94822.1	229	hypothetical protein D7D81_09570	QTL99458.1	212	hypothetical protein GM661_16650	46.86	207	107	1	8	211	4	210	2.09e-63	193
AZO94827.1	178	biotin transporter BioY	QTL97739.1	178	BioY family	96.629	178	6	0	1	178	1	178	6.68e-116	323
AZO94828.1	324	biotin synthase BioB	QTL97740.1	337	Catalyzes the conversion of dethiobiotin (DTB) to biotin by the insertion of a sulfur atom into dethiobiotin via a radical- based mechanism	97.826	322	7	0	1	322	1	322	0	641
AZO94829.1	836	bifunctional aconitate hydratase 2/2-methylisocitrate dehydratase	QTL97741.1	836	Aconitate B N-terminal domain	92.823	836	60	0	1	836	1	836	0	1600
AZO94830.1	384	DUF4349 domain-containing protein	QTL97742.1	384	Domain of unknown function (DUF4349)	98.438	384	6	0	1	384	1	384	0	771
AZO94831.1	198	sigma-70 family RNA polymerase sigma factor	QTL97743.1	199	TIGRFAM RNA polymerase sigma factor, sigma-70 family	95.477	199	8	1	1	198	1	199	3.59e-135	373
AZO94832.1	218	HAD family hydrolase	QTL97744.1	218	haloacid dehalogenase-like hydrolase	99.083	218	2	0	1	218	1	218	6.22e-161	440
AZO94833.1	467	sensor histidine kinase	QTL97746.1	465	histidine kinase HAMP region domain protein	97.645	467	9	1	1	467	1	465	0	914
AZO94835.1	107	hypothetical protein D7D81_09640	QTL97747.1	427	hypothetical protein GM661_06965	93.458	107	7	0	1	107	321	427	1.29e-68	208
AZO94836.1	281	4Fe-4S dicluster domain-containing protein	QTL97748.1	281	4Fe-4S binding domain	100	281	0	0	1	281	1	281	0	559
AZO94837.1	285	GNAT family N-acetyltransferase	QTL97749.1	285	Acetyltransferase (GNAT) domain	97.544	285	7	0	1	285	1	285	0	569
AZO94838.1	349	alpha/beta hydrolase	QTL97750.1	349	alpha beta	99.427	349	2	0	1	349	1	349	0	719
AZO94839.1	124	MerR family transcriptional regulator	QTL97751.1	124	MerR, DNA binding	96.774	124	4	0	1	124	1	124	4.94e-87	246
AZO94840.1	153	hypothetical protein D7D81_09665	QTL97752.1	153	Aldo/keto reductase family	100	153	0	0	1	153	1	153	7.21e-114	316
AZO94841.1	241	glycosyltransferase	QTL97753.1	241	Glycosyl transferase family 2	100	241	0	0	1	241	1	241	0	498
AZO94842.1	100	hypothetical protein D7D81_09675	QTL97754.1	89	Lipid A Biosynthesis N-terminal domain	96.591	88	3	0	1	88	1	88	1.46e-58	171
AZO94843.1	547	glycosyltransferase family 39 protein	QTL99938.1	547	dolichyl-phosphate-mannose-protein mannosyltransferase	98.172	547	10	0	1	547	1	547	0	1071
AZO94844.1	447	aminotransferase class III-fold pyridoxal phosphate-dependent enzyme	QTL97756.1	447	Aminotransferase class-III	99.329	447	3	0	1	447	1	447	0	914
AZO94845.1	438	M20/M25/M40 family metallo-hydrolase	QTL97757.1	438	selenium metabolism hydrolase	98.402	438	7	0	1	438	1	438	0	888
AZO94846.1	478	xanthine permease	QTL97758.1	478	Psort location CytoplasmicMembrane, score 10.00	99.582	478	2	0	1	478	1	478	0	935
AZO94847.1	455	dihydropyrimidinase	QTL97759.1	455	PFAM amidohydrolase	99.56	455	2	0	1	455	1	455	0	942
AZO94848.1	410	NAD-dependent dihydropyrimidine dehydrogenase subunit PreA	QTL99939.1	410	Dihydroorotate dehydrogenase	99.268	410	3	0	1	410	1	410	0	832
AZO94849.1	387	iron-containing alcohol dehydrogenase	QTL97761.1	387	PFAM Iron-containing alcohol dehydrogenase	99.742	387	1	0	1	387	1	387	0	786
AZO94851.1	388	hypothetical protein D7D81_09725	QTL97762.1	375	hypothetical protein GM661_07060	79.534	386	63	2	1	386	1	370	0	560
AZO94852.1	1223	LysM peptidoglycan-binding domain-containing protein	QTL98127.1	1207	LysM peptidoglycan-binding domain-containing protein	81.944	1224	202	8	1	1223	1	1206	0	1991
AZO94853.1	234	DNA-binding response regulator	QTL97765.1	234	PFAM response regulator receiver	97.863	234	5	0	1	234	1	234	3.68e-170	465
AZO94854.1	761	sensor histidine kinase	QTL97766.1	761	Histidine kinase	98.292	761	13	0	1	761	1	761	0	1524
AZO94855.1	345	[citrate (pro-3S)-lyase] ligase	QTL97767.1	345	Acetylation of prosthetic group (2-(5''-phosphoribosyl)- 3'-dephosphocoenzyme-A) of the gamma subunit of citrate lyase	97.971	345	7	0	1	345	1	345	0	693
AZO94856.1	97	citrate lyase acyl carrier protein	QTL97768.1	97	Covalent carrier of the coenzyme of citrate lyase	100	97	0	0	1	97	1	97	2.68e-68	196
AZO94857.1	292	citrate (pro-3S)-lyase subunit beta	QTL97769.1	292	Belongs to the HpcH HpaI aldolase family	99.315	292	2	0	1	292	1	292	0	584
AZO94858.1	519	citrate lyase subunit alpha	QTL97770.1	519	citrate lyase alpha subunit	100	519	0	0	1	519	1	519	0	1052
AZO94859.1	177	citrate lyase holo-[acyl-carrier protein] synthase	QTL97771.1	177	PFAM Apo-citrate lyase phosphoribosyl-dephospho-CoA transferase	99.432	176	1	0	1	176	1	176	2.88e-129	357
AZO94860.1	331	tripartite tricarboxylate transporter substrate binding protein	QTL97772.1	331	Tripartite tricarboxylate transporter family receptor	100	331	0	0	1	331	1	331	0	671
AZO94861.1	158	tripartite tricarboxylate transporter TctB family protein	QTL97773.1	158	Tripartite tricarboxylate transporter TctB family	99.367	158	1	0	1	158	1	158	4.38e-108	301
AZO94862.1	500	tripartite tricarboxylate transporter permease	QTL97774.1	500	Tripartite tricarboxylate transporter TctA family	100	500	0	0	1	500	1	500	0	985
AZO94863.1	309	triphosphoribosyl-dephospho-CoA synthase CitG	QTL97775.1	309	synthase	97.087	309	9	0	1	309	1	309	0	622
AZO94864.1	188	SAM-dependent DNA methyltransferase	QTL97776.1	484	N-6 DNA Methylase	100	188	0	0	1	188	1	188	1.21e-137	390
AZO94865.1	392	UDP-glucoronosyl and UDP-glucosyl transferase	QTL97779.1	392	Glycosyltransferase family 28 C-terminal domain	99.745	392	1	0	1	392	1	392	0	796
AZO94866.1	82	GNAT family N-acetyltransferase	QTL97780.1	76	Acetyltransferase (GNAT) family	92.683	82	0	1	1	82	1	76	3.3e-50	149
AZO94867.1	506	hypothetical protein D7D81_09810	QTL97781.1	505	hypothetical protein GM661_07155	97.431	506	12	1	1	506	1	505	0	989
AZO94868.1	193	GrpB family protein	QTL97782.1	193	GrpB protein	100	193	0	0	1	193	1	193	6.81e-146	400
AZO94869.1	326	aldo/keto reductase	QTL97783.1	326	Aldo/keto reductase family	98.773	326	4	0	1	326	1	326	0	662
AZO94870.1	152	cupin domain-containing protein	QTL97784.1	152	Cupin 2, conserved barrel domain protein	100	152	0	0	1	152	1	152	5.53e-115	318
AZO94871.1	60	hypothetical protein D7D81_09835	QTL97785.1	60	hypothetical protein GM661_07180	98.333	60	1	0	1	60	1	60	1.02e-39	121
AZO94872.1	118	hypothetical protein D7D81_09840	QTL97786.1	118	hypothetical protein GM661_07185	98.305	118	2	0	1	118	1	118	1.94e-81	231
AZO94873.1	223	nitroreductase family protein	QTL97788.1	230	Nitroreductase family	99.103	223	2	0	1	223	8	230	2.66e-166	454
AZO94874.1	133	hypothetical protein D7D81_09850	QTL97789.1	320	D-isomer specific 2-hydroxyacid dehydrogenase catalytic region	99.2	125	1	0	9	133	196	320	1.14e-86	252
AZO94875.1	201	hypothetical protein D7D81_09855	QTL97790.1	201	PFAM Nitroreductase	99.502	201	1	0	1	201	1	201	3.07e-149	409
AZO94876.1	132	type II toxin-antitoxin system death-on-curing family toxin	QTL97791.1	132	TIGRFAM death-on-curing family protein	100	132	0	0	1	132	1	132	3.59e-98	274
AZO94877.1	74	AbrB/MazE/SpoVT family DNA-binding domain-containing protein	QTL97792.1	74	SpoVT / AbrB like domain	100	74	0	0	1	74	1	74	3.38e-50	149
AZO94878.1	350	acyl-CoA--6-aminopenicillanic acid acyl-transferase	QTL97793.1	350	Acyl-coenzyme A:6-aminopenicillanic acid acyl-transferase	99.714	350	1	0	1	350	1	350	0	719
AZO94879.1	210	antibiotic acetyltransferase	QTL97794.1	210	transferase hexapeptide repeat	99.524	210	1	0	1	210	1	210	4.5e-157	429
AZO94880.1	72	AbrB/MazE/SpoVT family DNA-binding domain-containing protein	QTL97795.1	107	SpoVT / AbrB like domain	98.529	68	1	0	1	68	1	68	1.16e-45	138
AZO94881.1	112	nucleotidyltransferase domain-containing protein	QTL97797.1	112	Nucleotidyltransferase domain	100	112	0	0	1	112	1	112	2.83e-81	230
AZO94882.1	127	HEPN domain-containing protein	QTL97798.1	127	PFAM HEPN domain	100	127	0	0	1	127	1	127	3.76e-92	259
AZO94883.1	289	hypothetical protein D7D81_09900	QTL97799.1	255	hypothetical protein GM661_07255	98.039	255	5	0	35	289	1	255	0	513
AZO94884.1	123	MmcQ/YjbR family DNA-binding protein	QTL97801.1	123	YjbR	95.122	123	6	0	1	123	1	123	9.27e-86	242
AZO94885.1	115	TIGR04076 family protein	QTL97802.1	115	TIGR04076 family protein	99.13	115	1	0	1	115	1	115	3.95e-84	238
AZO94886.1	119	nucleotidyltransferase domain-containing protein	QTL97803.1	111	nucleotidyltransferase activity	99.099	111	1	0	9	119	1	111	8.88e-78	221
AZO94887.1	212	glutamine amidotransferase	QTL97804.1	212	PFAM DJ-1 PfpI family	99.528	212	1	0	1	212	1	212	1.5e-157	431
AZO94888.1	117	hypothetical protein D7D81_09945	QTL97525.1	155	Inorganic pyrophosphatase	87	100	13	0	2	101	43	142	3.35e-64	189
AZO94889.1	106	hypothetical protein D7D81_09950	QTL97884.1	106	hypothetical protein GM661_07765	87.736	106	13	0	1	106	1	106	3.53e-68	196
AZO94890.1	118	transposase	QTL99714.1	118	Family membership	100	118	0	0	1	118	1	118	7.43e-87	244
AZO94891.1	48	hypothetical protein D7D81_09965	QTL99714.1	118	Family membership	97.917	48	1	0	1	48	71	118	2.48e-31	101
AZO94892.1	167	N-acetyltransferase	QTL97808.1	167	Acetyltransferase (GNAT) domain	99.401	167	1	0	1	167	1	167	1.47e-124	344
AZO94893.1	323	DUF1835 domain-containing protein	QTL97809.1	326	Domain of unknown function (DUF1835)	96.53	317	11	0	1	317	1	317	0	637
AZO94894.1	270	aminoglycoside N(3)-acetyltransferase	QTL97812.1	270	Aminoglycoside 3-N-acetyltransferase	98.148	270	5	0	1	270	1	270	0	549
AZO94895.1	265	GNAT family N-acetyltransferase	QTL97813.1	265	GNAT family N-acetyltransferase	97.358	265	7	0	1	265	1	265	0	515
AZO94896.1	126	hypothetical protein D7D81_10000	QTL97814.1	411	dipeptidase activity	98.319	119	2	0	1	119	1	119	4.92e-85	251
AZO94897.1	183	hypothetical protein D7D81_10005	QTL97876.1	183	hypothetical protein GM661_07715	98.907	183	2	0	1	183	1	183	3.09e-136	375
AZO94898.1	174	GNAT family N-acetyltransferase	QTL97880.1	174	Acetyltransferase (GNAT) domain	98.851	174	2	0	1	174	1	174	3.16e-127	351
AZO94901.1	173	GNAT family N-acetyltransferase	QTL97831.1	173	Acetyltransferase (GNAT) domain	99.422	173	1	0	1	173	1	173	8.02e-128	353
AZO94903.1	149	DUF3368 domain-containing protein	QTM00102.1	76	Domain of unknown function (DUF3368)	72.368	76	21	0	74	149	1	76	9.64e-34	110
AZO94904.1	431	group II intron reverse transcriptase/maturase	QTL97879.1	431	PFAM Reverse transcriptase (RNA-dependent DNA polymerase)	100	431	0	0	1	431	1	431	0	892
AZO94905.1	140	N-acetyltransferase	QTL96585.1	134	Acetyltransferase (GNAT) domain	39.844	128	69	5	1	126	1	122	1.95e-21	80.9
AZO94906.1	139	PIN domain-containing protein	QTL99752.1	140	domain protein	36.567	134	84	1	2	134	1	134	8.8e-22	81.6
AZO94909.1	437	group II intron reverse transcriptase/maturase	QTL97796.1	437	DNA polymerase	99.771	437	1	0	1	437	1	437	0	892
AZO94911.1	431	group II intron reverse transcriptase/maturase	QTL97847.1	431	PFAM Reverse transcriptase (RNA-dependent DNA polymerase)	99.536	431	2	0	1	431	1	431	0	888
AZO94913.1	174	GNAT family N-acetyltransferase	QTL97880.1	174	Acetyltransferase (GNAT) domain	99.425	174	1	0	1	174	1	174	2.08e-128	354
AZO94914.1	286	PhzF family phenazine biosynthesis protein	QTL97839.1	286	TIGRFAM phenazine biosynthesis protein PhzF family	100	286	0	0	1	286	1	286	0	588
AZO94915.1	437	group II intron reverse transcriptase/maturase	QTL97796.1	437	DNA polymerase	99.771	437	1	0	1	437	1	437	0	892
AZO94916.1	109	DUF2087 domain-containing protein	QTL97841.1	109	regulatory protein, LuxR	100	109	0	0	1	109	1	109	3.3e-77	219
AZO94917.1	145	hypothetical protein D7D81_10110	QTL97842.1	145	hypothetical protein GM661_07490	100	145	0	0	1	145	1	145	1.27e-106	297
AZO94918.1	103	type II toxin-antitoxin system RelE/ParE family toxin	QTL97904.1	103	addiction module toxin, RelE StbE family	91.262	103	9	0	1	103	1	103	2.7e-66	191
AZO94919.1	88	type II toxin-antitoxin system Phd/YefM family antitoxin	QTL97905.1	88	Antitoxin component of a toxin-antitoxin (TA) module	94.253	87	5	0	1	87	1	87	3.24e-59	172
AZO94920.1	111	nucleotidyltransferase domain-containing protein	QTL97270.1	111	Nucleotidyltransferase domain	33.962	106	63	3	10	111	3	105	5.46e-15	62.4
AZO94921.1	137	HEPN domain-containing protein	QTL97269.1	109	HEPN domain	38.136	118	62	3	3	120	2	108	1.25e-19	75.1
AZO94922.1	437	group II intron reverse transcriptase/maturase	QTL97796.1	437	DNA polymerase	99.771	437	1	0	1	437	1	437	0	892
AZO94924.1	149	DUF3368 domain-containing protein	QTM00102.1	76	Domain of unknown function (DUF3368)	72.368	76	21	0	74	149	1	76	9.64e-34	110
AZO94925.1	431	group II intron reverse transcriptase/maturase	QTL97879.1	431	PFAM Reverse transcriptase (RNA-dependent DNA polymerase)	99.768	431	1	0	1	431	1	431	0	889
AZO94926.1	132	type II toxin-antitoxin system VapC family toxin	QTL97822.1	132	PIN domain	93.182	132	9	0	1	132	1	132	1.81e-90	255
AZO94927.1	75	AbrB/MazE/SpoVT family DNA-binding domain-containing protein	QTL97823.1	75	Antidote-toxin recognition MazE, bacterial antitoxin	97.333	75	2	0	1	75	1	75	3.4e-50	149
AZO94930.1	291	hypothetical protein D7D81_10180	QTL97860.1	296	Phosphorylase superfamily	99.639	277	1	0	15	291	20	296	0	566
AZO94931.1	282	integrase	QTL97861.1	282	Belongs to the 'phage' integrase family	97.872	282	6	0	1	282	1	282	0	573
AZO94935.1	95	hypothetical protein D7D81_10210	QTL97837.1	126	Belongs to the 'phage' integrase family	82.292	96	12	2	1	91	1	96	2.55e-52	157
AZO94936.1	181	N-acetyltransferase	QTL97866.1	181	Acetyltransferase (GNAT) domain	99.448	181	1	0	1	181	1	181	7.57e-133	366
AZO94937.1	285	SDR family oxidoreductase	QTL97867.1	285	NmrA-like family	99.298	285	2	0	1	285	1	285	0	578
AZO94938.1	125	nuclear transport factor 2 family protein	QTL97868.1	125	SnoaL-like domain	98.4	125	2	0	1	125	1	125	4.58e-90	253
AZO94939.1	209	nitroreductase family protein	QTL97788.1	230	Nitroreductase family	36.715	207	127	2	3	209	28	230	1.22e-43	142
AZO94940.1	216	hypothetical protein D7D81_10235	QTL97533.1	208	homoserine transmembrane transporter activity	80.612	196	37	1	7	201	1	196	3.11e-110	311
AZO94941.1	431	group II intron reverse transcriptase/maturase	QTL97879.1	431	PFAM Reverse transcriptase (RNA-dependent DNA polymerase)	99.768	431	1	0	1	431	1	431	0	889
AZO94942.1	213	lactate utilization protein	QTL97590.1	212	LUD domain	40.865	208	122	1	6	213	6	212	1.11e-56	176
AZO94944.1	263	hypothetical protein D7D81_10270	QTL97872.1	263	hypothetical protein GM661_07695	100	263	0	0	1	263	1	263	0	525
AZO94947.1	62	hypothetical protein D7D81_10290	QTL97910.1	126	sequence-specific DNA binding	81.356	59	11	0	4	62	68	126	3.1e-28	94.7
AZO94948.1	295	hypothetical protein D7D81_10295	QTL97495.1	597	hypothetical protein GM661_05600	73.191	235	62	1	2	236	104	337	1.09e-117	347
AZO94949.1	422	hypothetical protein D7D81_10300	QTL97896.1	601	hypothetical protein GM661_07830	86.957	414	54	0	3	416	188	601	0	746
AZO94949.1	422	hypothetical protein D7D81_10300	QTL97896.1	601	hypothetical protein GM661_07830	71.09	211	57	1	211	417	169	379	5.65e-99	304
AZO94950.1	180	hypothetical protein D7D81_10305	QTL97897.1	180	hypothetical protein GM661_07835	83.333	180	30	0	1	180	1	180	4.41e-99	281
AZO94954.1	297	hypothetical protein D7D81_10325	QTL97908.1	297	hypothetical protein GM661_07890	98.653	297	4	0	1	297	1	297	0	603
AZO94955.1	126	XRE family transcriptional regulator	QTL97910.1	126	sequence-specific DNA binding	84.127	126	20	0	1	126	1	126	1.1e-68	199
AZO94956.1	225	deoxyribose-phosphate aldolase	QTL97911.1	225	Catalyzes a reversible aldol reaction between acetaldehyde and D-glyceraldehyde 3-phosphate to generate 2-deoxy- D-ribose 5-phosphate	97.778	225	5	0	1	225	1	225	6.16e-160	438
AZO94957.1	508	xylulokinase	QTL97912.1	508	Sugar (pentulose and hexulose) kinases	98.622	508	7	0	1	508	1	508	0	1036
AZO94958.1	331	aldo/keto reductase	QTL97913.1	331	Aldo/keto reductase family	97.281	331	9	0	1	331	1	331	0	657
AZO94959.1	168	D-ribose pyranase	QTL97914.1	178	Catalyzes the interconversion of beta-pyran and beta- furan forms of D-ribose	98.204	167	3	0	1	167	1	167	1.71e-122	339
AZO94960.1	223	fructose-6-phosphate aldolase	QTL97915.1	223	Transaldolase is important for the balance of metabolites in the pentose-phosphate pathway	99.103	223	2	0	1	223	1	223	2.77e-160	439
AZO94961.1	389	ROK family transcriptional regulator	QTL97916.1	389	Psort location Cytoplasmic, score	98.715	389	5	0	1	389	1	389	0	787
AZO94962.1	326	sugar ABC transporter substrate-binding protein	QTL97917.1	168	Periplasmic binding protein domain	96.429	168	6	0	1	168	1	168	2.01e-119	338
AZO94963.1	505	sugar ABC transporter ATP-binding protein	QTL97919.1	505	ABC-type sugar transport system, ATPase component	98.812	505	6	0	1	505	1	505	0	992
AZO94964.1	313	ABC transporter permease	QTL99951.1	320	ABC transporter permease protein	99.681	313	1	0	1	313	8	320	0	597
AZO94965.1	349	NAD(P)-dependent alcohol dehydrogenase	QTL97920.1	349	Psort location Cytoplasmic, score	98.281	349	6	0	1	349	1	349	0	690
AZO94966.1	322	carbohydrate kinase	QTL97921.1	322	Belongs to the carbohydrate kinase PfkB family	95.963	322	13	0	1	322	1	322	0	627
AZO94967.1	87	hypothetical protein D7D81_10405	QTL97922.1	87	COG2197 Response regulator containing a CheY-like receiver domain and an HTH DNA-binding domain	98.851	87	1	0	1	87	1	87	4.61e-60	174
AZO94968.1	446	hypothetical protein D7D81_10410	QTL97923.1	446	pyrroloquinoline quinone binding	97.758	446	10	0	1	446	1	446	0	912
AZO94969.1	325	nucleoside hydrolase	QTL97924.1	325	nucleoside hydrolase	98.154	325	6	0	1	325	1	325	0	665
AZO94970.1	191	ECF transporter S component	QTL97925.1	191	ECF transporter, substrate-specific component	93.194	191	13	0	1	191	1	191	2.25e-125	348
AZO94971.1	229	radical SAM protein	QTL97926.1	229	Elongator protein 3, MiaB family, Radical SAM	97.38	229	6	0	1	229	1	229	9.24e-169	461
AZO94972.1	375	hypothetical protein D7D81_10430	QTL97927.1	375	amino acid	93.6	375	24	0	1	375	1	375	0	627
AZO94973.1	365	hypothetical protein D7D81_10435	QTL97928.1	363	amino acid	97.784	361	8	0	1	361	1	361	0	690
AZO94974.1	520	spore germination protein	QTL97929.1	520	GerA spore germination protein	95.376	519	24	0	1	519	1	519	0	975
AZO94975.1	402	Ger(x)C family spore germination protein	QTL97930.1	402	Spore germination B3/ GerAC like, C-terminal	95.844	385	16	0	18	402	18	402	0	759
AZO94976.1	1066	carbamoyl-phosphate synthase large subunit	QTL97931.1	1066	Carbamoyl-phosphate synthase L chain, ATP binding domain	98.874	1066	12	0	1	1066	1	1066	0	2131
AZO94977.1	458	radical SAM protein	QTL97932.1	458	PFAM Radical SAM superfamily	99.782	458	1	0	1	458	1	458	0	952
AZO94978.1	335	LacI family transcriptional regulator	QTL97933.1	335	Bacterial regulatory proteins, lacI family	99.701	335	1	0	1	335	1	335	0	689
AZO94979.1	412	extracellular solute-binding protein	QTL97934.1	412	extracellular solute-binding	92.233	412	32	0	1	412	1	412	0	783
AZO94980.1	849	hypothetical protein D7D81_10490	QTL97935.1	849	Cellulase N-terminal ig-like domain	98.467	848	13	0	1	848	1	848	0	1720
AZO94981.1	784	glycosyl transferase	QTL97936.1	784	Glycosyltransferase 36 associated family	98.852	784	9	0	1	784	1	784	0	1606
AZO94982.1	809	glycosyl transferase	QTL97937.1	809	Glycosyltransferase 36 associated family	99.382	809	5	0	1	809	1	809	0	1678
AZO94983.1	551	acetyl-CoA synthetase	QTL97938.1	551	AMP-dependent synthetase and ligase	99.456	551	3	0	1	551	1	551	0	1136
AZO94984.1	320	lactate dehydrogenase	QTL97939.1	320	Belongs to the D-isomer specific 2-hydroxyacid dehydrogenase family	98.75	320	4	0	1	320	1	320	0	647
AZO94985.1	223	hypothetical protein D7D81_10515	QTL97940.1	220	Competence protein ComEA helix-hairpin-helix repeat	86.878	221	27	1	3	223	2	220	1.22e-122	343
AZO94986.1	765	DNA internalization-related competence protein ComEC/Rec2	QTL97941.1	765	DNA internalization-related competence protein ComEC Rec2	98.301	765	13	0	1	765	1	765	0	1495
AZO94987.1	401	sodium:proton antiporter	QTL97942.1	401	PFAM sodium hydrogen exchanger	99.501	401	2	0	1	401	1	401	0	768
AZO94988.1	78	alpha/beta-type small acid-soluble spore protein	QTL97944.1	78	PFAM Small, acid-soluble spore proteins, alpha beta type	100	78	0	0	1	78	1	78	2.76e-54	159
AZO94989.1	80	alpha/beta-type small acid-soluble spore protein	QTL97945.1	80	PFAM Small, acid-soluble spore proteins, alpha beta type	98.75	80	1	0	1	80	1	80	3.29e-54	159
AZO94990.1	332	DNA polymerase III subunit delta	QTL97946.1	332	TIGRFAM DNA polymerase III, delta subunit	100	332	0	0	1	332	1	332	0	656
AZO94991.1	87	30S ribosomal protein S20	QTL97947.1	87	Binds directly to 16S ribosomal RNA	100	87	0	0	1	87	1	87	1.81e-58	171
AZO94992.1	111	phage holin family protein	QTL97948.1	111	Mycobacterial 4 TMS phage holin, superfamily IV	100	111	0	0	1	111	1	111	1.31e-72	208
AZO94993.1	335	GPR endopeptidase	QTL97949.1	335	Initiates the rapid degradation of small, acid-soluble proteins during spore germination	100	335	0	0	1	335	1	335	0	673
AZO94994.1	325	carbohydrate kinase	QTL97950.1	325	PFAM PfkB domain protein	98.154	325	6	0	1	325	1	325	0	642
AZO94995.1	368	hypothetical protein D7D81_10570	QTL97951.1	368	PFAM Stage II sporulation protein P (SpoIIP)	99.185	368	3	0	1	368	1	368	0	744
AZO94996.1	595	elongation factor 4	QTL97952.1	595	Required for accurate and efficient protein synthesis under certain stress conditions. May act as a fidelity factor of the translation reaction, by catalyzing a one-codon backward translocation of tRNAs on improperly translocated ribosomes. Back- translocation proceeds from a post-translocation (POST) complex to a pre-translocation (PRE) complex, thus giving elongation factor G a second chance to…	100	595	0	0	1	595	1	595	0	1209
AZO94997.1	388	radical SAM family heme chaperone HemW	QTL97953.1	327	Involved in the biosynthesis of porphyrin-containing compound	96.865	319	10	0	70	388	8	326	0	630
AZO94998.1	348	heat-inducible transcription repressor HrcA	QTL97954.1	348	Negative regulator of class I heat shock genes (grpE- dnaK-dnaJ and groELS operons). Prevents heat-shock induction of these operons	99.713	348	1	0	1	348	1	348	0	696
AZO94999.1	203	nucleotide exchange factor GrpE	QTL97955.1	203	Participates actively in the response to hyperosmotic and heat shock by preventing the aggregation of stress-denatured proteins, in association with DnaK and GrpE. It is the nucleotide exchange factor for DnaK and may function as a thermosensor. Unfolded proteins bind initially to DnaJ	99.015	203	2	0	1	203	1	203	2.63e-142	392
AZO95000.1	615	molecular chaperone DnaK	QTL97956.1	611	Heat shock 70 kDa protein	98.374	615	6	1	1	615	1	611	0	1216
AZO95001.1	377	molecular chaperone DnaJ	QTL97957.1	377	ATP binding to DnaK triggers the release of the substrate protein, thus completing the reaction cycle. Several rounds of ATP-dependent interactions between DnaJ, DnaK and GrpE are required for fully efficient folding. Also involved, together with DnaK and GrpE, in the DNA replication of plasmids through activation of initiation proteins	98.674	377	5	0	1	377	1	377	0	769
AZO95002.1	288	50S ribosomal protein L11 methyltransferase	QTL97958.1	288	Methylates ribosomal protein L11	97.917	288	6	0	1	288	1	288	0	568
AZO95003.1	249	16S rRNA (uracil(1498)-N(3))-methyltransferase	QTL97959.1	249	Specifically methylates the N3 position of the uracil ring of uridine 1498 (m3U1498) in 16S rRNA. Acts on the fully assembled 30S ribosomal subunit	99.598	249	1	0	1	249	1	249	0	503
AZO95004.1	436	tRNA (N(6)-L-threonylcarbamoyladenosine(37)-C(2))-methylthiotransferase MtaB	QTL97960.1	436	MiaB-like tRNA modifying enzyme	98.165	436	8	0	1	436	1	436	0	882
AZO95005.1	114	histidine triad nucleotide-binding protein	QTL97961.1	114	Histidine triad (HIT) protein	100	114	0	0	1	114	1	114	2.82e-84	238
AZO95006.1	434	nodulation protein NfeD	QTL97962.1	434	Membrane-bound serine protease (ClpP class)	95.853	434	18	0	1	434	1	434	0	785
AZO95007.1	335	UPF0365 family protein	QTL99956.1	335	SigmaW regulon antibacterial	100	335	0	0	1	335	1	335	0	666
AZO95008.1	160	hypothetical protein D7D81_10640	QTL97963.1	160	hypothetical protein GM661_08215	98.75	160	2	0	1	160	1	160	7.13e-116	321
AZO95009.1	231	DUF421 domain-containing protein	QTL97964.1	231	membrane	87.879	231	28	0	1	231	1	231	1.04e-135	377
AZO95010.1	253	class I SAM-dependent methyltransferase	QTL97965.1	253	Methyltransferase domain	98.814	253	3	0	1	253	1	253	0	503
AZO95011.1	93	sporulation protein YqfC	QTL97966.1	93	TIGRFAM sporulation protein YqfC	98.925	93	1	0	1	93	1	93	1.64e-62	181
AZO95012.1	390	sporulation protein YqfD	QTL97967.1	390	stage IV sporulation protein YqfD	98.462	390	6	0	1	390	1	390	0	765
AZO95013.1	319	PhoH family protein	QTL97968.1	319	PFAM PhoH family protein	99.687	319	1	0	1	319	1	319	0	637
AZO95014.1	728	HDIG domain-containing protein	QTL97969.1	728	7TM receptor with intracellular HD hydrolase	99.863	728	1	0	1	728	1	728	0	1471
AZO95015.1	142	rRNA maturation RNase YbeY	QTL97970.1	142	Single strand-specific metallo-endoribonuclease involved in late-stage 70S ribosome quality control and in maturation of the 3' terminus of the 16S rRNA	100	142	0	0	1	142	1	142	3.4e-104	290
AZO95016.1	232	phosphatase PAP2 family protein	QTL97971.1	232	PFAM Prokaryotic diacylglycerol kinase	99.138	232	2	0	1	232	1	232	4.88e-162	444
AZO95017.1	420	HlyC/CorC family transporter	QTL97972.1	421	CBS domain	98.337	421	6	1	1	420	1	421	0	822
AZO95018.1	202	DUF502 domain-containing protein	QTL97973.1	202	Protein of unknown function (DUF502)	99.505	202	1	0	1	202	1	202	4.56e-142	391
AZO95019.1	334	DUF881 domain-containing protein	QTL97974.1	334	Bacterial protein of unknown function (DUF881)	98.802	334	4	0	1	334	1	334	0	656
AZO95020.1	400	DUF3048 domain-containing protein	QTL97975.1	399	Protein of unknown function (DUF3048) C-terminal domain	97.5	400	9	1	1	400	1	399	0	798
AZO95021.1	294	GTPase Era	QTL97976.1	294	An essential GTPase that binds both GDP and GTP, with rapid nucleotide exchange. Plays a role in 16S rRNA processing and 30S ribosomal subunit biogenesis and possibly also in cell cycle regulation and energy metabolism	99.66	294	1	0	1	294	1	294	0	593
AZO95022.1	440	magnesium transporter	QTL97977.1	440	Acts as a magnesium transporter	99.545	440	2	0	1	440	1	440	0	880
AZO95023.1	233	deoxyribose-phosphate aldolase	QTL97978.1	233	Catalyzes a reversible aldol reaction between acetaldehyde and D-glyceraldehyde 3-phosphate to generate 2-deoxy- D-ribose 5-phosphate	99.571	233	1	0	1	233	1	233	1.76e-171	468
AZO95024.1	251	DNA repair protein RecO	QTL97979.1	251	Involved in DNA repair and RecF pathway recombination	99.203	251	2	0	1	251	1	251	0	508
AZO95025.1	140	DUF4342 domain-containing protein	QTL97980.1	140	Domain of unknown function (DUF4342)	100	140	0	0	1	140	1	140	1.14e-98	276
AZO95026.1	287	glycine--tRNA ligase subunit alpha	QTL97981.1	287	PFAM glycyl-tRNA synthetase alpha subunit	99.652	287	1	0	1	287	1	287	0	595
AZO95027.1	685	glycine--tRNA ligase subunit beta	QTL97982.1	685	glycyl-tRNA synthetase, tetrameric type, beta subunit	98.686	685	9	0	1	685	1	685	0	1359
AZO95028.1	333	deoxyguanosinetriphosphate triphosphohydrolase	QTL97983.1	333	Belongs to the dGTPase family. Type 2 subfamily	100	333	0	0	1	333	1	333	0	685
AZO95029.1	590	DNA primase	QTL97984.1	590	RNA polymerase that catalyzes the synthesis of short RNA molecules used as primers for DNA polymerase during DNA replication	98.983	590	6	0	1	590	1	590	0	1184
AZO95030.1	362	RNA polymerase sigma factor RpoD	QTL97985.1	362	Sigma factors are initiation factors that promote the attachment of RNA polymerase to specific initiation sites and are then released	99.724	362	1	0	1	362	1	362	0	720
AZO95031.1	369	Nif3-like dinuclear metal center hexameric protein	QTL97986.1	369	Belongs to the GTP cyclohydrolase I type 2 NIF3 family	98.374	369	6	0	1	369	1	369	0	744
AZO95032.1	63	TraR/DksA family transcriptional regulator	QTL97987.1	63	hypothetical protein GM661_08340	100	63	0	0	1	63	1	63	1.2e-42	129
AZO95033.1	497	sensor domain-containing diguanylate cyclase	QTL97988.1	497	TIGRFAM diguanylate cyclase (GGDEF) domain	98.793	497	6	0	1	497	1	497	0	984
AZO95034.1	80	hypothetical protein D7D81_10780	QTL97989.1	80	hypothetical protein GM661_08355	100	80	0	0	1	80	1	80	1.17e-52	155
AZO95035.1	68	hypothetical protein D7D81_10785	QTL97990.1	68	hypothetical protein GM661_08360	100	68	0	0	1	68	1	68	4.12e-46	138
AZO95036.1	253	YebC/PmpR family DNA-binding transcriptional regulator	QTL97991.1	253	transcriptional regulatory protein	99.209	253	2	0	1	253	1	253	0	510
AZO95037.1	229	hypothetical protein D7D81_10795	QTL97992.1	229	hypothetical protein GM661_08370	98.253	229	4	0	1	229	1	229	1.27e-166	455
AZO95038.1	161	crossover junction endodeoxyribonuclease RuvC	QTL97993.1	161	Nuclease that resolves Holliday junction intermediates in genetic recombination. Cleaves the cruciform structure in supercoiled DNA by nicking to strands with the same polarity at sites symmetrically opposed at the junction in the homologous arms and leaves a 5'-terminal phosphate and a 3'-terminal hydroxyl group	100	161	0	0	1	161	1	161	3.33e-117	325
AZO95039.1	202	Holliday junction branch migration protein RuvA	QTL97994.1	202	The RuvA-RuvB complex in the presence of ATP renatures cruciform structure in supercoiled DNA with palindromic sequence, indicating that it may promote strand exchange reactions in homologous recombination. RuvAB is a helicase that mediates the Holliday junction migration by localized denaturation and reannealing. RuvA stimulates, in the presence of DNA, the weak ATPase activity of RuvB	99.01	202	2	0	1	202	1	202	2.46e-143	394
AZO95040.1	341	Holliday junction branch migration DNA helicase RuvB	QTL97995.1	341	The RuvA-RuvB complex in the presence of ATP renatures cruciform structure in supercoiled DNA with palindromic sequence, indicating that it may promote strand exchange reactions in homologous recombination. RuvAB is a helicase that mediates the Holliday junction migration by localized denaturation and reannealing	100	341	0	0	1	341	1	341	0	681
AZO95041.1	340	tRNA preQ1(34) S-adenosylmethionine ribosyltransferase-isomerase QueA	QTL97996.1	340	Transfers and isomerizes the ribose moiety from AdoMet to the 7-aminomethyl group of 7-deazaguanine (preQ1-tRNA) to give epoxyqueuosine (oQ-tRNA)	98.235	340	6	0	1	340	1	340	0	678
AZO95042.1	369	tRNA guanosine(34) transglycosylase Tgt	QTL97997.1	369	Catalyzes the base-exchange of a guanine (G) residue with the queuine precursor 7-aminomethyl-7-deazaguanine (PreQ1) at position 34 (anticodon wobble position) in tRNAs with GU(N) anticodons (tRNA-Asp, -Asn, -His and -Tyr). Catalysis occurs through a double-displacement mechanism. The nucleophile active site attacks the C1' of nucleotide 34 to detach the guanine base from the RNA, forming a coval…	99.187	369	3	0	1	369	1	369	0	763
AZO95043.1	103	preprotein translocase subunit YajC	QTL97998.1	103	TIGRFAM preprotein translocase, YajC subunit	99.029	103	1	0	1	103	1	103	4.23e-70	201
AZO95044.1	178	signal peptidase I	QTL97999.1	178	Belongs to the peptidase S26 family	100	178	0	0	1	178	1	178	2.42e-133	367
AZO95045.1	405	protein translocase subunit SecD	QTL98000.1	405	Part of the Sec protein translocase complex. Interacts with the SecYEG preprotein conducting channel. SecDF uses the proton motive force (PMF) to complete protein translocation after the ATP-dependent function of SecA	99.753	405	1	0	1	405	1	405	0	798
AZO95046.1	288	protein translocase subunit SecF	QTL98001.1	288	Part of the Sec protein translocase complex. Interacts with the SecYEG preprotein conducting channel. SecDF uses the proton motive force (PMF) to complete protein translocation after the ATP-dependent function of SecA	97.917	288	6	0	1	288	1	288	0	561
AZO95047.1	558	AarF/ABC1/UbiB kinase family protein	QTL98002.1	558	pfam abc1	99.283	558	4	0	1	558	1	558	0	1102
AZO95048.1	354	histidinol-phosphate transaminase	QTL98003.1	354	Belongs to the class-II pyridoxal-phosphate-dependent aminotransferase family. Histidinol-phosphate aminotransferase subfamily	96.893	354	11	0	1	354	1	354	0	695
AZO95049.1	115	LapA family protein	QTL98004.1	115	Pfam:DUF1049	100	115	0	0	1	115	1	115	9.89e-78	221
AZO95050.1	178	tryptophan transporter	QTL98005.1	178	Tryptophan transporter TrpP	98.315	178	3	0	1	178	1	178	1.32e-121	337
AZO95051.1	826	single-stranded-DNA-specific exonuclease RecJ	QTL98006.1	826	TIGRFAM single-stranded-DNA-specific exonuclease RecJ	97.579	826	20	0	1	826	1	826	0	1623
AZO95052.1	170	adenine phosphoribosyltransferase	QTL98007.1	170	Catalyzes a salvage reaction resulting in the formation of AMP, that is energically less costly than de novo synthesis	97.647	170	4	0	1	170	1	170	1.22e-121	337
AZO95053.1	718	bifunctional (p)ppGpp synthetase/guanosine-3',5'-bis(diphosphate) 3'-pyrophosphohydrolase	QTL98008.1	718	In eubacteria ppGpp (guanosine 3'-diphosphate 5-' diphosphate) is a mediator of the stringent response that coordinates a variety of cellular activities in response to changes in nutritional abundance	99.164	718	6	0	1	718	1	718	0	1457
AZO95054.1	149	D-tyrosyl-tRNA(Tyr) deacylase	QTL98009.1	149	rejects L-amino acids rather than detecting D-amino acids in the active site. By recycling D-aminoacyl-tRNA to D-amino acids and free tRNA molecules, this enzyme counteracts the toxicity associated with the formation of D-aminoacyl-tRNA entities in vivo and helps enforce protein L-homochirality	99.329	149	1	0	1	149	1	149	1.5e-107	299
AZO95055.1	200	MBL fold metallo-hydrolase	QTL98010.1	200	PFAM Metallo-beta-lactamase superfamily	99.5	200	1	0	1	200	1	200	1.17e-147	405
AZO95056.1	476	hypothetical protein D7D81_10890	QTL98011.1	476	PPIC-type PPIASE domain	97.479	476	12	0	1	476	1	476	0	931
AZO95057.1	417	histidine--tRNA ligase	QTL98012.1	417	tRNA synthetase class II core domain (G, H, P, S and T)	99.041	417	4	0	1	417	1	417	0	848
AZO95058.1	590	aspartate--tRNA ligase	QTL98013.1	590	Aspartyl-tRNA synthetase with relaxed tRNA specificity since it is able to aspartylate not only its cognate tRNA(Asp) but also tRNA(Asn). Reaction proceeds in two steps L-aspartate is first activated by ATP to form Asp-AMP and then transferred to the acceptor end of tRNA(Asp Asn)	99.492	590	3	0	1	590	1	590	0	1197
AZO95059.1	102	hypothetical protein D7D81_10905	QTL98014.1	102	hypothetical protein GM661_08480	100	102	0	0	1	102	1	102	1.33e-68	197
AZO95060.1	193	5-formyltetrahydrofolate cyclo-ligase	QTL98015.1	193	PFAM 5-formyltetrahydrofolate cyclo-ligase	98.964	193	2	0	1	193	1	193	5.66e-139	382
AZO95061.1	447	replication-associated recombination protein A	QTL98016.1	447	AAA ATPase, central domain protein	99.105	447	4	0	1	447	1	447	0	900
AZO95062.1	208	YigZ family protein	QTL98017.1	208	family UPF0029	99.519	208	1	0	1	208	1	208	9.9e-151	413
AZO95063.1	145	Rrf2 family transcriptional regulator	QTL98018.1	145	TIGRFAM transcriptional regulator, Rrf2 family	100	145	0	0	1	145	1	145	1.25e-108	302
AZO95064.1	128	Fe-S cluster assembly scaffold protein NifU	QTL98019.1	128	PFAM NifU-like N terminal domain	96.094	128	5	0	1	128	1	128	3.24e-89	251
AZO95065.1	169	hypothetical protein D7D81_10950	QTL98020.1	169	hypothetical protein GM661_08525	94.083	169	10	0	1	169	1	169	1.79e-107	301
AZO95066.1	294	hypothetical protein D7D81_10955	QTL98021.1	294	hypothetical protein GM661_08530	98.98	294	3	0	1	294	1	294	0	585
AZO95069.1	284	hypothetical protein D7D81_10970	QTL98022.1	255	hypothetical protein GM661_08535	97.015	67	2	0	211	277	1	67	1.66e-39	135
AZO95070.1	177	hypothetical protein D7D81_10975	QTL98022.1	255	hypothetical protein GM661_08535	94.904	157	8	0	15	171	94	250	9.55e-89	257
AZO95073.1	530	hypothetical protein D7D81_10990	QTL98023.1	530	hypothetical protein GM661_08540	94.857	525	27	0	1	525	1	525	0	976
AZO95075.1	1856	alpha-2-macroglobulin family protein	QTL98024.1	1856	hypothetical protein GM661_08545	93.646	1857	116	2	1	1856	1	1856	0	3536
AZO95076.1	778	penicillin-binding protein 1C	QTL98025.1	778	Penicillin-Binding Protein C-terminus Family	95.63	778	34	0	1	778	1	778	0	1509
AZO95077.1	314	mechanosensitive ion channel family protein	QTL98026.1	314	COG0668 Small-conductance mechanosensitive channel	98.726	314	4	0	1	314	1	314	0	624
AZO95078.1	306	ribonuclease HI	QTL98027.1	306	Endonuclease that specifically degrades the RNA of RNA- DNA hybrids	98.039	306	6	0	1	306	1	306	0	605
AZO95079.1	131	transcriptional repressor	QTL98028.1	131	Belongs to the Fur family	95.385	130	6	0	1	130	1	130	3.79e-94	264
AZO95080.1	333	tryptophan--tRNA ligase	QTL98029.1	333	PFAM tRNA synthetases class I (W and Y)	100	333	0	0	1	333	1	333	0	692
AZO95081.1	343	D-alanine--D-alanine ligase	QTL98030.1	343	Belongs to the D-alanine--D-alanine ligase family	98.251	343	6	0	1	343	1	343	0	691
AZO95082.1	385	DNA polymerase IV	QTL98031.1	385	Poorly processive, error-prone DNA polymerase involved in untargeted mutagenesis. Copies undamaged DNA at stalled replication forks, which arise in vivo from mismatched or misaligned primer ends. These misaligned primers can be extended by PolIV. Exhibits no 3'-5' exonuclease (proofreading) activity. May be involved in translesional synthesis, in conjunction with the beta clamp from PolIII	97.662	385	9	0	1	385	1	385	0	763
AZO95083.1	487	insulinase family protein	QTL98032.1	487	Insulinase (Peptidase family M16)	98.768	487	6	0	1	487	1	487	0	980
AZO95084.1	143	transcriptional regulator MraZ	QTL98033.1	143	Belongs to the MraZ family	100	143	0	0	1	143	1	143	8.2e-107	297
AZO95085.1	309	16S rRNA (cytosine(1402)-N(4))-methyltransferase RsmH	QTL98034.1	309	Specifically methylates the N4 position of cytidine in position 1402 (C1402) of 16S rRNA	100	309	0	0	1	309	1	309	0	639
AZO95086.1	162	hypothetical protein D7D81_11090	QTL98035.1	162	hypothetical protein GM661_08635	98.765	162	2	0	1	162	1	162	1.01e-115	321
AZO95087.1	694	stage V sporulation protein D	QTL98036.1	694	Penicillin-binding protein dimerisation domain	98.703	694	9	0	1	694	1	694	0	1388
AZO95088.1	492	UDP-N-acetylmuramoyl-L-alanyl-D-glutamate--2,6-diaminopimelate ligase	QTL98037.1	492	Catalyzes the addition of meso-diaminopimelic acid to the nucleotide precursor UDP-N-acetylmuramoyl-L-alanyl-D-glutamate (UMAG) in the biosynthesis of bacterial cell-wall peptidoglycan	99.593	492	2	0	1	492	1	492	0	1001
AZO95089.1	461	UDP-N-acetylmuramoyl-tripeptide--D-alanyl-D-alanine ligase	QTL98038.1	461	Involved in cell wall formation. Catalyzes the final step in the synthesis of UDP-N-acetylmuramoyl-pentapeptide, the precursor of murein	99.783	461	1	0	1	461	1	461	0	920
AZO95090.1	319	phospho-N-acetylmuramoyl-pentapeptide-transferase	QTL98039.1	319	First step of the lipid cycle reactions in the biosynthesis of the cell wall peptidoglycan	99.687	319	1	0	1	319	1	319	0	618
AZO95091.1	461	UDP-N-acetylmuramoyl-L-alanine--D-glutamate ligase	QTL98040.1	461	Cell wall formation. Catalyzes the addition of glutamate to the nucleotide precursor UDP-N-acetylmuramoyl-L-alanine (UMA)	98.265	461	8	0	1	461	1	461	0	926
AZO95092.1	365	stage V sporulation protein E	QTL98041.1	365	Belongs to the SEDS family	99.726	365	1	0	1	365	1	365	0	711
AZO95093.1	368	undecaprenyldiphospho-muramoylpentapeptide beta-N-acetylglucosaminyltransferase	QTL98042.1	368	Cell wall formation. Catalyzes the transfer of a GlcNAc subunit on undecaprenyl-pyrophosphoryl-MurNAc-pentapeptide (lipid intermediate I) to form undecaprenyl-pyrophosphoryl-MurNAc- (pentapeptide)GlcNAc (lipid intermediate II)	99.728	368	1	0	1	368	1	368	0	741
AZO95094.1	460	UDP-N-acetylmuramate--L-alanine ligase	QTL98043.1	460	Belongs to the MurCDEF family	99.565	460	2	0	1	460	1	460	0	932
AZO95095.1	234	FtsQ-type POTRA domain-containing protein	QTL98044.1	234	Cell division protein FtsQ	99.573	234	1	0	1	234	1	234	4.29e-170	464
AZO95096.1	421	cell division protein FtsA	QTL98045.1	421	Cell division protein that is involved in the assembly of the Z ring. May serve as a membrane anchor for the Z ring	99.287	421	3	0	1	421	1	421	0	838
AZO95097.1	353	cell division protein FtsZ	QTL98046.1	353	Essential cell division protein that forms a contractile ring structure (Z ring) at the future cell division site. The regulation of the ring assembly controls the timing and the location of cell division. One of the functions of the FtsZ ring is to recruit other cell division proteins to the septum to produce a new cell wall between the dividing cells. Binds GTP and shows GTPase activity	99.433	353	2	0	1	353	1	353	0	683
AZO95098.1	297	hypothetical protein D7D81_11150	QTL98047.1	297	aspartic protease that is responsible for the proteolytic cleavage of the RNA polymerase sigma E factor (SigE spoIIGB) to yield the active peptide in the mother cell during sporulation. Responds to a signal from the forespore that is triggered by the extracellular signal protein SpoIIR	98.99	297	3	0	1	297	1	297	0	585
AZO95100.1	265	RNA polymerase sporulation sigma factor SigG	QTL98048.1	265	Sigma factors are initiation factors that promote the attachment of RNA polymerase to specific initiation sites and are then released	100	265	0	0	1	265	1	265	0	536
AZO95101.1	238	hypothetical protein D7D81_11170	QTL98049.1	238	TIGRFAM stage II sporulation protein R	98.739	238	3	0	1	238	1	238	5.92e-176	479
AZO95102.1	83	YlmC/YmxH family sporulation protein	QTL98050.1	83	TIGRFAM sporulation protein, YlmC YmxH family	100	83	0	0	1	83	1	83	2.06e-54	160
AZO95103.1	151	transcriptional repressor NrdR	QTL98051.1	151	Negatively regulates transcription of bacterial ribonucleotide reductase nrd genes and operons by binding to NrdR- boxes	100	151	0	0	1	151	1	151	1.73e-110	307
AZO95104.1	268	peptidoglycan editing factor PgeF	QTL98052.1	268	Belongs to the multicopper oxidase YfiH RL5 family	98.881	268	3	0	1	268	1	268	0	547
AZO95105.1	317	hypothetical protein D7D81_11190	QTL98053.1	317	membrane fusion protein	97.161	317	9	0	1	317	1	317	0	616
AZO95106.1	232	YggS family pyridoxal phosphate-dependent enzyme	QTL98054.1	232	Pyridoxal 5'-phosphate (PLP)-binding protein, which is involved in PLP homeostasis	96.121	232	9	0	1	232	1	232	4.69e-168	459
AZO95107.1	129	cell division protein SepF	QTL98055.1	129	Cell division protein that is part of the divisome complex and is recruited early to the Z-ring. Probably stimulates Z-ring formation, perhaps through the cross-linking of FtsZ protofilaments. Its function overlaps with FtsA	99.225	129	1	0	1	129	1	129	9.92e-93	260
AZO95108.1	97	YggT family protein	QTL98056.1	97	PFAM YGGT family	100	97	0	0	1	97	1	97	3.57e-65	188
AZO95109.1	262	photosystem II S4 domain protein	QTL98057.1	262	PFAM S4 domain	100	262	0	0	1	262	1	262	0	533
AZO95110.1	166	DivIVA domain-containing protein	QTL98058.1	166	PFAM DivIVA	100	166	0	0	1	166	1	166	1.11e-117	327
AZO95111.1	1033	isoleucine--tRNA ligase	QTL98059.1	1033	amino acids such as valine, to avoid such errors it has two additional distinct tRNA(Ile)-dependent editing activities. One activity is designated as 'pretransfer' editing and involves the hydrolysis of activated Val-AMP. The other activity is designated 'posttransfer' editing and involves deacylation of mischarged Val-tRNA(Ile)	99.322	1032	7	0	1	1032	1	1032	0	2109
AZO95112.1	153	recombinase XerC	QTL97818.1	362	Phage integrase, N-terminal SAM-like domain	57.516	153	63	2	1	152	208	359	8.27e-56	176
AZO95116.1	252	class I SAM-dependent methyltransferase	QTL98063.1	252	Methyltransferase domain	94.841	252	13	0	1	252	1	252	5.22e-173	473
AZO95118.1	431	group II intron reverse transcriptase/maturase	QTL97879.1	431	PFAM Reverse transcriptase (RNA-dependent DNA polymerase)	99.768	431	1	0	1	431	1	431	0	889
AZO95119.1	211	HD domain-containing protein	QTL98008.1	718	In eubacteria ppGpp (guanosine 3'-diphosphate 5-' diphosphate) is a mediator of the stringent response that coordinates a variety of cellular activities in response to changes in nutritional abundance	34.211	152	77	7	5	139	24	169	2.27e-15	70.9
AZO95120.1	490	group II intron reverse transcriptase/maturase	QTL99259.1	431	PFAM Reverse transcriptase (RNA-dependent DNA polymerase)	32.775	418	230	13	37	425	6	401	3.9e-48	168
AZO95121.1	196	DJ-1/PfpI family protein	QTL99165.1	182	DJ-1 family	29.577	142	92	4	52	190	45	181	7.83e-12	58.2
AZO95125.1	228	MBL fold metallo-hydrolase	QTL97882.1	239	domain protein	28.774	212	121	7	17	210	24	223	3.63e-17	74.3
AZO95126.1	126	hypothetical protein D7D81_11330	QTL98066.1	126	hypothetical protein GM661_08805	97.619	126	3	0	1	126	1	126	7.88e-87	245
AZO95127.1	106	hypothetical protein D7D81_11335	QTL97884.1	106	hypothetical protein GM661_07765	87.736	106	13	0	1	106	1	106	3.53e-68	196
AZO95128.1	118	transposase	QTL99714.1	118	Family membership	100	118	0	0	1	118	1	118	7.43e-87	244
AZO95129.1	222	hypothetical protein D7D81_11350	QTL98067.1	222	PFAM Sporulation and spore germination	96.847	222	7	0	1	222	1	222	2.06e-158	434
AZO95130.1	159	hypothetical protein D7D81_11355	QTL98068.1	159	hypothetical protein GM661_08815	100	159	0	0	1	159	1	159	1.68e-119	330
AZO95131.1	1112	extracellular solute-binding protein	QTL98069.1	252	BlaR1 peptidase M56	97.08	137	4	0	284	420	116	252	2.88e-88	281
AZO95131.1	1112	extracellular solute-binding protein	QTL98069.1	252	BlaR1 peptidase M56	96.522	115	4	0	1	115	1	115	7.93e-68	225
AZO95132.1	129	BlaI/MecI/CopY family transcriptional regulator	QTL98070.1	129	penicillinase repressor	97.674	129	3	0	1	129	1	129	9.42e-92	258
AZO95133.1	412	hypothetical protein D7D81_11370	QTL98071.1	412	Psort location Cytoplasmic, score	96.543	405	14	0	8	412	8	412	0	798
AZO95134.1	224	TetR/AcrR family transcriptional regulator	QTL98072.1	224	Bacterial regulatory proteins, tetR family	99.107	224	2	0	1	224	1	224	3.16e-160	439
AZO95135.1	234	ABC transporter ATP-binding protein	QTL98073.1	234	PFAM ABC transporter	100	234	0	0	1	234	1	234	2.18e-175	478
AZO95136.1	412	ABC transporter permease	QTL98074.1	412	ABC-type transport system involved in lipoprotein release permease component	98.301	412	7	0	1	412	1	412	0	810
AZO95137.1	417	ABC transporter permease	QTL98075.1	417	ABC-type transport system involved in lipoprotein release permease component	98.801	417	5	0	1	417	1	417	0	832
AZO95138.1	377	hypothetical protein D7D81_11400	QTL98076.1	377	hypothetical protein GM661_08860	94.96	377	19	0	1	377	1	377	0	719
AZO95139.1	393	PLP-dependent aminotransferase family protein	QTL98077.1	393	PFAM Aminotransferase class I and II	99.237	393	3	0	1	393	1	393	0	795
AZO95140.1	128	hypothetical protein D7D81_11410	QTL98078.1	128	hypothetical protein GM661_08870	99.219	128	1	0	1	128	1	128	4.2e-86	243
AZO95141.1	569	S-layer homology domain-containing protein	QTL98079.1	569	PFAM S-layer domain-containing protein	69.349	584	149	7	1	569	1	569	0	766
AZO95142.1	264	AraC family transcriptional regulator	QTL98080.1	265	AraC protein, arabinose-binding	91.188	261	23	0	1	261	1	261	1.4e-179	491
AZO95143.1	302	DMT family transporter	QTL98081.1	302	EamA-like transporter family	97.674	301	7	0	1	301	1	301	0	583
AZO95144.1	122	hypothetical protein D7D81_11430	QTL98082.1	323	hypothetical protein GM661_08890	94.262	122	7	0	1	122	1	122	1.56e-71	213
AZO95146.1	233	alpha/beta hydrolase	QTL98082.1	323	hypothetical protein GM661_08890	90	230	23	0	4	233	94	323	3.52e-149	415
AZO95147.1	157	glyoxalase/bleomycin resistance/dioxygenase family protein	QTL98083.1	157	Glyoxalase-like domain	97.452	157	4	0	1	157	1	157	3.5e-111	309
AZO95148.1	167	GNAT family N-acetyltransferase	QTL98084.1	167	Acetyltransferase (GNAT) domain	98.204	167	3	0	1	167	1	167	1.1e-123	342
AZO95149.1	135	DUF2000 domain-containing protein	QTL98085.1	135	Protein of unknown function (DUF2000)	99.259	135	1	0	1	135	1	135	5.84e-98	274
AZO95150.1	170	GNAT family N-acetyltransferase	QTL98086.1	170	PFAM Acetyltransferase (GNAT) family	100	170	0	0	1	170	1	170	6.77e-126	347
AZO95151.1	111	cupin domain-containing protein	QTL98087.1	113	Cupin domain	99.091	110	1	0	1	110	1	110	4.34e-78	222
AZO95152.1	114	DsrE family protein	QTL98088.1	114	DsrE/DsrF-like family	100	114	0	0	1	114	1	114	8.01e-80	226
AZO95153.1	146	NUDIX domain-containing protein	QTL98089.1	146	Belongs to the Nudix hydrolase family	98.63	146	2	0	1	146	1	146	4.94e-106	295
AZO95154.1	433	M18 family aminopeptidase	QTL98090.1	433	M18 family aminopeptidase	100	433	0	0	1	433	1	433	0	891
AZO95155.1	149	stage V sporulation protein AC	QTL98091.1	149	SpoVAC/SpoVAEB sporulation membrane protein	100	149	0	0	1	149	1	149	2.16e-106	296
AZO95156.1	338	stage V sporulation protein AD	QTL98092.1	338	Stage V sporulation protein AD	98.817	338	4	0	1	338	1	338	0	681
AZO95157.1	117	stage V sporulation protein AE	QTL98093.1	117	TIGRFAM stage V sporulation protein AE	98.291	117	2	0	1	117	1	117	5.36e-79	224
AZO95158.1	428	MFS transporter	QTL98094.1	428	Major Facilitator Superfamily	98.598	428	6	0	1	428	1	428	0	846
AZO95159.1	210	class I SAM-dependent methyltransferase	QTL98095.1	210	Methyltransferase domain	93.81	210	13	0	1	210	1	210	6.98e-150	411
AZO95161.1	241	DUF421 domain-containing protein	QTL98096.1	241	membrane	93.361	241	16	0	1	241	1	241	3.8e-148	410
AZO95162.1	150	CBS domain-containing protein	QTL98097.1	150	PFAM CBS domain containing protein	95.333	150	7	0	1	150	1	150	2.37e-103	289
AZO95163.1	427	cation:proton antiporter	QTL98098.1	427	Transporter, CPA2 family	98.126	427	8	0	1	427	1	427	0	815
AZO95164.1	77	hypothetical protein D7D81_11535	QTL98099.1	77	hypothetical protein GM661_08980	93.506	77	5	0	1	77	1	77	9.4e-48	142
AZO95165.1	227	DNA-binding response regulator	QTL98100.1	227	Two component transcriptional regulator, winged helix family	99.119	227	2	0	1	227	1	227	4.32e-164	449
AZO95166.1	460	HAMP domain-containing protein	QTL98101.1	462	histidine kinase HAMP region domain protein	93.506	462	28	1	1	460	1	462	0	884
AZO95167.1	107	hypothetical protein D7D81_11550	QTL98102.1	107	hypothetical protein GM661_08995	99.065	107	1	0	1	107	1	107	6.26e-70	201
AZO95168.1	351	hypothetical protein D7D81_11555	QTL98103.1	351	Archaeal vacuolar-type H -ATPase subunit C	98.575	351	5	0	1	351	1	351	0	694
AZO95169.1	534	hypothetical protein D7D81_11560	QTL98104.1	639	Belongs to the V-ATPase 116 kDa subunit family	95.946	518	21	0	1	518	1	518	0	979
AZO95170.1	118	hypothetical protein D7D81_11565	QTL98104.1	639	Belongs to the V-ATPase 116 kDa subunit family	100	118	0	0	1	118	522	639	2.9e-76	234
AZO95171.1	139	ATPase	QTL98105.1	139	ATP synthase, subunit C	96.403	139	5	0	1	139	1	139	4.65e-88	249
AZO95172.1	103	ATP synthase subunit F	QTL98106.1	103	Archaeal vacuolar-type H -ATPase subunit F	97.087	103	3	0	1	103	1	103	1.17e-67	195
AZO95173.1	236	hypothetical protein D7D81_11580	QTL98107.1	211	hypothetical protein GM661_09020	87.204	211	27	0	26	236	1	211	2.47e-131	366
AZO95174.1	464	V-type ATP synthase subunit B	QTL98109.1	464	Produces ATP from ADP in the presence of a proton gradient across the membrane. The V-type beta chain is a regulatory subunit	95.259	464	22	0	1	464	1	464	0	906
AZO95175.1	204	V-type ATP synthase subunit D	QTL98110.1	204	Produces ATP from ADP in the presence of a proton gradient across the membrane	97.059	204	6	0	1	204	1	204	3.64e-146	402
AZO95176.1	154	hypothetical protein D7D81_11600	QTL98111.1	154	Heat induced stress protein YflT	99.351	154	1	0	1	154	1	154	3.7e-108	301
AZO95177.1	254	epoxyqueuosine reductase	QTL98112.1	254	Catalyzes the conversion of epoxyqueuosine (oQ) to queuosine (Q), which is a hypermodified base found in the wobble positions of tRNA(Asp), tRNA(Asn), tRNA(His) and tRNA(Tyr)	94.882	254	13	0	1	254	1	254	0	505
AZO95178.1	449	MATE family efflux transporter	QTL98113.1	449	Polysaccharide biosynthesis C-terminal domain	97.996	449	9	0	1	449	1	449	0	870
AZO95179.1	93	hypothetical protein D7D81_11615	QTL98114.1	93	hypothetical protein GM661_09055	98.925	93	1	0	1	93	1	93	2.79e-61	178
AZO95180.1	145	signal peptidase II	QTL98115.1	145	This protein specifically catalyzes the removal of signal peptides from prolipoproteins	96.552	145	5	0	1	145	1	145	8.92e-97	272
AZO95181.1	309	RluA family pseudouridine synthase	QTL98116.1	309	Responsible for synthesis of pseudouridine from uracil	95.779	308	13	0	1	308	1	308	0	595
AZO95182.1	400	dicarboxylate/amino acid:cation symporter	QTL98117.1	400	Belongs to the dicarboxylate amino acid cation symporter (DAACS) (TC 2.A.23) family	98	400	8	0	1	400	1	400	0	772
AZO95183.1	438	serine dehydratase subunit alpha family protein	QTL98118.1	438	Belongs to the UPF0597 family	99.543	438	2	0	1	438	1	438	0	861
AZO95184.1	124	RidA family protein	QTL98119.1	124	PFAM Endoribonuclease L-PSP	99.194	124	1	0	1	124	1	124	5.43e-88	248
AZO95185.1	212	YheO-like PAS domain protein	QTL98120.1	212	YheO-like protein	97.17	212	6	0	1	212	1	212	1.21e-147	406
AZO95186.1	183	bifunctional pyr operon transcriptional regulator/uracil phosphoribosyltransferase PyrR	QTL98121.1	183	Also displays a weak uracil phosphoribosyltransferase activity which is not physiologically significant	98.907	183	2	0	1	183	1	183	1.44e-126	350
AZO95187.1	410	uracil permease	QTL98122.1	410	Permease family	100	410	0	0	1	410	1	410	0	804
AZO95188.1	316	UV DNA damage repair endonuclease UvsE	QTL98123.1	316	UV-endonuclease UvdE	98.418	316	5	0	1	316	1	316	0	642
AZO95189.1	396	FprA family A-type flavoprotein	QTL98124.1	396	flavodoxin nitric oxide synthase	97.98	396	8	0	1	396	1	396	0	800
AZO95190.1	241	phosphohydrolase	QTL98125.1	241	Ser Thr phosphatase family protein	97.925	241	5	0	1	241	1	241	5.91e-178	485
AZO95191.1	398	isocitrate/isopropylmalate dehydrogenase family protein	QTL98129.1	398	Catalyzes the oxidation of 3-carboxy-2-hydroxy-4- methylpentanoate (3-isopropylmalate) to 3-carboxy-4-methyl-2- oxopentanoate. The product decarboxylates to 4-methyl-2 oxopentanoate	98.744	398	5	0	1	398	1	398	0	805
AZO95192.1	396	NADP transhydrogenase subunit alpha	QTL98130.1	396	NAD NADP octopine nopaline dehydrogenase, alpha-helical domain	98.737	396	5	0	1	396	1	396	0	798
AZO95193.1	550	methionine synthase	QTL98131.1	550	cobalamin binding	98.909	550	6	0	1	550	1	550	0	1123
AZO95194.1	223	Crp/Fnr family transcriptional regulator	QTL98132.1	223	PFAM Bacterial regulatory proteins, crp family	99.103	223	2	0	1	223	1	223	1.38e-163	447
AZO95195.1	495	apolipoprotein N-acyltransferase	QTL98133.1	495	TIGRFAM apolipoprotein N-acyltransferase	97.98	495	10	0	1	495	1	495	0	961
AZO95196.1	613	asparagine synthase (glutamine-hydrolyzing)	QTL98134.1	613	TIGRFAM asparagine synthase (glutamine-hydrolyzing)	99.511	613	3	0	1	613	1	613	0	1259
AZO95197.1	582	fibronectin/fibrinogen-binding protein	QTL98135.1	582	Fibronectin-binding protein A N-terminus (FbpA)	98.625	582	8	0	1	582	1	582	0	1161
AZO95198.1	896	calcium-translocating P-type ATPase, SERCA-type	QTL98136.1	896	ATPase, P-type (transporting), HAD superfamily, subfamily IC	97.768	896	20	0	1	896	1	896	0	1778
AZO95199.1	142	Lrp/AsnC family transcriptional regulator	QTL98137.1	142	AsnC family	95.07	142	7	0	1	142	1	142	4.06e-98	275
AZO95200.1	426	Glu/Leu/Phe/Val dehydrogenase	QTL98138.1	426	Belongs to the Glu Leu Phe Val dehydrogenases family	99.531	426	2	0	1	426	1	426	0	878
AZO95201.1	440	citrate/2-methylcitrate synthase	QTL98139.1	440	Citrate synthase, C-terminal domain	98.636	440	6	0	1	440	1	440	0	887
AZO95202.1	414	dicarboxylate/amino acid:cation symporter	QTL98117.1	400	Belongs to the dicarboxylate amino acid cation symporter (DAACS) (TC 2.A.23) family	27.136	398	255	16	11	395	4	379	2.64e-15	73.6
AZO95203.1	344	asparaginase	QTL98141.1	344	L-asparaginase	99.709	344	1	0	1	344	1	344	0	701
AZO95204.1	83	DUF370 domain-containing protein	QTL98142.1	83	Belongs to the UPF0296 family	100	83	0	0	1	83	1	83	7.54e-57	166
AZO95205.1	189	guanylate kinase	QTL98143.1	189	Essential for recycling GMP and indirectly, cGMP	99.471	189	1	0	1	189	1	189	2.43e-141	388
AZO95206.1	71	DNA-directed RNA polymerase subunit omega	QTL99966.1	70	Promotes RNA polymerase assembly. Latches the N- and C- terminal regions of the beta' subunit thereby facilitating its interaction with the beta and alpha subunits	97.143	70	2	0	2	71	1	70	9.09e-45	135
AZO95207.1	392	bifunctional phosphopantothenoylcysteine decarboxylase/phosphopantothenate--cysteine ligase CoaBC	QTL98144.1	392	Catalyzes two steps in the biosynthesis of coenzyme A. In the first step cysteine is conjugated to 4'-phosphopantothenate to form 4-phosphopantothenoylcysteine, in the latter compound is decarboxylated to form 4'-phosphopantotheine	99.235	392	3	0	1	392	1	392	0	796
AZO95208.1	258	prolipoprotein diacylglyceryl transferase	QTL98145.1	258	Transfers the N-acyl diglyceride group on what will become the N-terminal cysteine of membrane lipoproteins	100	258	0	0	1	258	1	258	0	504
AZO95209.1	394	methionine adenosyltransferase	QTL98146.1	394	Catalyzes the formation of S-adenosylmethionine (AdoMet) from methionine and ATP. The overall synthetic reaction is composed of two sequential steps, AdoMet formation and the subsequent tripolyphosphate hydrolysis which occurs prior to release of AdoMet from the enzyme	99.492	394	2	0	1	394	1	394	0	798
AZO95210.1	352	UPF0104 family protein	QTL98147.1	352	Catalyzes the transfer of a lysyl group from L-lysyl- tRNA(Lys) to membrane-bound phosphatidylglycerol (PG), which produces lysylphosphatidylglycerol (LPG), a major component of the bacterial membrane with a positive net charge. LPG synthesis contributes to bacterial virulence as it is involved in the resistance mechanism against cationic antimicrobial peptides (CAMP) produces by the host's immun…	100	352	0	0	1	352	1	352	0	681
AZO95211.1	745	primosomal protein N'	QTL98148.1	745	Involved in the restart of stalled replication forks. Recognizes and binds the arrested nascent DNA chain at stalled replication forks. It can open the DNA duplex, via its helicase activity, and promote assembly of the primosome and loading of the major replicative helicase DnaB onto DNA	99.463	745	4	0	1	745	1	745	0	1521
AZO95212.1	168	peptide deformylase	QTL99967.1	168	Removes the formyl group from the N-terminal Met of newly synthesized proteins. Requires at least a dipeptide for an efficient rate of reaction. N-terminal L-methionine is a prerequisite for activity but the enzyme has broad specificity at other positions	100	168	0	0	1	168	1	168	6.78e-121	335
AZO95213.1	315	methionyl-tRNA formyltransferase	QTL98149.1	315	Attaches a formyl group to the free amino group of methionyl-tRNA(fMet). The formyl group appears to play a dual role in the initiator identity of N-formylmethionyl-tRNA by promoting its recognition by IF2 and preventing the misappropriation of this tRNA by the elongation apparatus	98.73	315	4	0	1	315	1	315	0	634
AZO95214.1	231	zinc metallopeptidase	QTL98150.1	231	zinc metallopeptidase	99.567	231	1	0	1	231	1	231	4.06e-169	462
AZO95215.1	446	16S rRNA (cytosine(967)-C(5))-methyltransferase RsmB	QTL98151.1	446	Specifically methylates the cytosine at position 967 (m5C967) of 16S rRNA	99.327	446	3	0	1	446	1	446	0	904
AZO95216.1	348	23S rRNA (adenine(2503)-C(2))-methyltransferase RlmN	QTL98152.1	348	Specifically methylates position 2 of adenine 2503 in 23S rRNA and position 2 of adenine 37 in tRNAs	99.425	348	2	0	1	348	1	348	0	712
AZO95217.1	235	Stp1/IreP family PP2C-type Ser/Thr phosphatase	QTL98153.1	235	SMART protein phosphatase 2C domain protein	100	235	0	0	1	235	1	235	8.11e-177	481
AZO95218.1	640	Stk1 family PASTA domain-containing Ser/Thr kinase	QTL98154.1	640	Protein kinase domain	99.844	640	1	0	1	640	1	640	0	1301
AZO95219.1	277	ribosome small subunit-dependent GTPase A	QTL98155.1	277	One of several proteins that assist in the late maturation steps of the functional core of the 30S ribosomal subunit. Helps release RbfA from mature subunits. May play a role in the assembly of ribosomal proteins into the subunit. Circularly permuted GTPase that catalyzes slow GTP hydrolysis, GTPase activity is stimulated by the 30S ribosomal subunit	99.639	277	1	0	1	277	1	277	0	570
AZO95220.1	215	ribulose-phosphate 3-epimerase	QTL98156.1	215	PFAM Ribulose-phosphate 3 epimerase family	100	215	0	0	1	215	1	215	5.65e-159	435
AZO95221.1	176	energy-coupled thiamine transporter ThiT	QTL98157.1	176	Proton-coupled thiamine transporter YuaJ	100	176	0	0	1	176	1	176	3.52e-127	351
AZO95222.1	216	thiamine diphosphokinase	QTL98158.1	216	PFAM Thiamin pyrophosphokinase	100	216	0	0	1	216	1	216	5.27e-154	422
AZO95223.1	65	hypothetical protein D7D81_11850	QTL98159.1	65	hypothetical protein GM661_09300	100	65	0	0	1	65	1	65	8.02e-42	127
AZO95224.1	261	hypothetical protein D7D81_11855	QTL98160.1	261	Peptidase M48	98.851	261	3	0	1	261	1	261	0	520
AZO95225.1	279	fumarate hydratase	QTL98161.1	279	TIGRFAM hydro-lyases, Fe-S type, tartrate fumarate subfamily, alpha region	98.925	279	3	0	1	279	1	279	0	555
AZO95226.1	180	Fe-S-containing hydro-lyase	QTL98162.1	180	Fe-S type, tartrate fumarate subfamily, beta	98.333	180	3	0	1	180	1	180	1.56e-127	352
AZO95227.1	408	NAD-dependent malic enzyme	QTL98163.1	408	Malic protein domain protein	99.265	408	3	0	1	408	1	408	0	812
AZO95228.1	76	50S ribosomal protein L28	QTL98164.1	76	Belongs to the bacterial ribosomal protein bL28 family	98.684	76	1	0	1	76	1	76	9.11e-49	145
AZO95229.1	120	Asp23/Gls24 family envelope stress response protein	QTL98165.1	120	Asp23 family, cell envelope-related function	100	120	0	0	1	120	1	120	3.79e-83	235
AZO95230.1	547	DAK2 domain-containing protein	QTL98166.1	547	TIGRFAM DAK2 domain fusion protein YloV	99.269	547	4	0	1	547	1	547	0	1084
AZO95231.1	292	DegV family protein	QTL98167.1	292	TIGRFAM degV family protein	98.288	292	5	0	1	292	1	292	0	586
AZO95232.1	683	ATP-dependent DNA helicase RecG	QTL98168.1	683	Critical role in recombination and DNA repair. Helps process Holliday junction intermediates to mature products by catalyzing branch migration. Has a DNA unwinding activity characteristic of a DNA helicase with a 3'- to 5'- polarity. Unwinds branched duplex DNA (Y-DNA)	97.804	683	15	0	1	683	1	683	0	1367
AZO95234.1	180	16S rRNA (guanine(966)-N(2))-methyltransferase RsmD	QTL98169.1	180	PFAM Conserved	98.889	180	2	0	1	180	1	180	8.79e-130	358
AZO95235.1	162	pantetheine-phosphate adenylyltransferase	QTL98170.1	162	Reversibly transfers an adenylyl group from ATP to 4'- phosphopantetheine, yielding dephospho-CoA (dPCoA) and pyrophosphate	99.383	162	1	0	1	162	1	162	1.8e-118	328
AZO95236.1	277	hypothetical protein D7D81_11915	QTL98171.1	410	TIGRFAM sporulation integral membrane protein YlbJ	98.556	277	4	0	1	277	134	410	0	536
AZO95240.1	123	helix-turn-helix domain-containing protein	QTL96777.1	123	transcriptional regulator, XRE family	62.81	121	42	1	4	121	2	122	3.16e-49	150
AZO95241.1	68	XRE family transcriptional regulator	QTL96521.1	78	Transcriptional	45.455	66	36	0	1	66	1	66	2.08e-15	60.8
AZO95244.1	174	XRE family transcriptional regulator	QTL96526.1	173	helix-turn-helix domain-containing protein	72.093	172	48	0	2	173	1	172	1.29e-92	264
AZO95245.1	86	hypothetical protein D7D81_11960	QTL96530.1	87	hypothetical protein GM661_00380	54.023	87	37	2	1	85	1	86	1.49e-25	87.8
AZO95246.1	62	hypothetical protein D7D81_11965	QTL96531.1	62	hypothetical protein GM661_00385	91.228	57	5	0	1	57	1	57	6.71e-35	109
AZO95247.1	294	hypothetical protein D7D81_11970	QTL96532.1	302	Phage recombination protein Bet	64.583	96	34	0	199	294	207	302	2.38e-37	131
AZO95250.1	93	hypothetical protein D7D81_11985	QTL96533.1	91	hypothetical protein GM661_00400	76.087	92	21	1	2	93	1	91	1.22e-45	139
AZO95254.1	127	single-stranded DNA-binding protein	QTL99820.1	146	TIGRFAM single stranded DNA-binding protein (ssb)	85.965	114	16	0	1	114	1	114	1.77e-72	210
AZO95263.1	63	hypothetical protein D7D81_12050	QTL96545.1	58	hypothetical protein GM661_00460	67.241	58	8	1	17	63	1	58	7.26e-20	71.6
AZO95291.1	179	N-acetylmuramoyl-L-alanine amidase	QTL97097.1	747	PFAM Copper amine oxidase N-terminal domain	43.82	178	97	3	3	178	562	738	2.37e-39	138
AZO95298.1	135	hypothetical protein D7D81_12225	QTL98171.1	410	TIGRFAM sporulation integral membrane protein YlbJ	99.242	132	1	0	1	132	1	132	9.33e-92	268
AZO95299.1	409	hypothetical protein D7D81_12230	QTL98172.1	409	hypothetical protein GM661_09365	96.822	409	13	0	1	409	1	409	0	778
AZO95300.1	304	EamA family transporter	QTL99968.1	301	EamA-like transporter family	96.678	301	10	0	4	304	1	301	0	578
AZO95301.1	891	bifunctional acetaldehyde-CoA/alcohol dehydrogenase	QTL98173.1	891	belongs to the iron- containing alcohol dehydrogenase family	98.316	891	15	0	1	891	1	891	0	1821
AZO95302.1	310	hypothetical protein D7D81_12245	QTL98177.1	322	Periplasmic binding protein LacI transcriptional regulator	62.258	310	114	2	1	310	16	322	1.49e-137	389
AZO95303.1	495	sugar ABC transporter ATP-binding protein	QTL98178.1	495	Part of the ABC transporter complex RbsABC involved in ribose import. Responsible for energy coupling to the transport system	70.505	495	145	1	1	495	1	494	0	699
AZO95304.1	307	LacI family transcriptional regulator	QTL98177.1	322	Periplasmic binding protein LacI transcriptional regulator	60.573	279	109	1	30	307	44	322	1.02e-121	348
AZO95305.1	457	sigma-54-dependent Fis family transcriptional regulator	QTL98174.1	460	response regulator receiver	63.457	457	161	3	3	454	4	459	0	591
AZO95306.1	711	HAMP domain-containing protein	QTL98176.1	357	histidine kinase, HAMP	58.571	350	144	1	354	702	6	355	3.1e-142	417
AZO95307.1	75	hypothetical protein D7D81_12275	QTL98185.1	905	MMPL family transporter	91.935	62	5	0	14	75	396	457	9e-32	112
AZO95308.1	224	hypothetical protein D7D81_12280	QTL98185.1	905	MMPL family transporter	85.52	221	27	1	3	223	550	765	2.45e-130	385
AZO95308.1	224	hypothetical protein D7D81_12280	QTL98185.1	905	MMPL family transporter	58.621	58	18	1	170	221	818	875	7.38e-14	67
AZO95309.1	290	GNAT family N-acetyltransferase	QTL98188.1	290	gnat family	97.586	290	7	0	1	290	1	290	0	582
AZO95311.1	120	hypothetical protein D7D81_12295	QTL98191.1	149	Helix-turn-helix domain	96.639	119	4	0	1	119	30	148	4.59e-86	244
AZO95313.1	177	permease	QTL98193.1	177	Predicted permease	94.915	177	9	0	1	177	1	177	1.31e-119	332
AZO95315.1	70	hypothetical protein D7D81_12315	QTL98194.1	70	hypothetical protein GM661_09480	98.571	70	1	0	1	70	1	70	1.42e-43	132
AZO95316.1	99	hypothetical protein D7D81_12320	QTL98195.1	99	hypothetical protein GM661_09485	100	99	0	0	1	99	1	99	5.4e-70	201
AZO95317.1	90	hypothetical protein D7D81_12325	QTL98196.1	90	hypothetical protein GM661_09490	100	90	0	0	1	90	1	90	6.88e-61	177
AZO95318.1	82	hypothetical protein D7D81_12330	QTL98197.1	82	hypothetical protein GM661_09495	100	82	0	0	1	82	1	82	2.74e-56	164
AZO95319.1	97	hypothetical protein D7D81_12335	QTL98198.1	97	hypothetical protein GM661_09500	96.907	97	3	0	1	97	1	97	3.44e-66	191
AZO95320.1	74	hypothetical protein D7D81_12340	QTL98199.1	74	hypothetical protein GM661_09505	100	74	0	0	1	74	1	74	1.29e-46	139
AZO95321.1	79	hypothetical protein D7D81_12345	QTL98200.1	79	hypothetical protein GM661_09510	98.734	79	1	0	1	79	1	79	7.99e-53	155
AZO95322.1	61	hypothetical protein D7D81_12350	QTL98201.1	61	hypothetical protein GM661_09515	98.333	60	1	0	1	60	1	60	6.95e-39	119
AZO95323.1	101	antibiotic biosynthesis monooxygenase	QTL98202.1	101	Antibiotic biosynthesis monooxygenase	93.069	101	7	0	1	101	1	101	1.46e-69	199
AZO95324.1	399	iron-containing alcohol dehydrogenase	QTL98203.1	399	PFAM Iron-containing alcohol dehydrogenase	97.243	399	11	0	1	399	1	399	0	783
AZO95325.1	543	hypothetical protein D7D81_12365	QTL98204.1	543	Peptidoglycan-binding domain 1 protein	98.527	543	8	0	1	543	1	543	0	1081
AZO95326.1	431	DUF1015 domain-containing protein	QTL98205.1	431	Conserved protein	99.072	431	4	0	1	431	1	431	0	880
AZO95327.1	362	DUF362 domain-containing protein	QTL98206.1	362	Domain of unknown function (DUF362)	98.895	362	4	0	1	362	1	362	0	725
AZO95328.1	332	PDZ domain-containing protein	QTL98207.1	332	Belongs to the peptidase S16 family	99.398	332	2	0	1	332	1	332	0	667
[truncated: 1,346 more rows]

## Sheet: Interval % identity
Interval percentage Identiy of strain SP3-1 vs NS-1 T
% identity	No. gene	% of gene
20-30	200	5.97907
40-50	122	3.64723
60-70	76	2.27205
80-90	2477	74.0508
100	470	14.0508
Total	3345	100

## Sheet: SP3-1 Diference NS-1
Query	Description
AZO93118.1	COG3316 Transposase and inactivated derivatives
AZO93169.1	Permease YjgP YjgQ family
AZO93170.1	Alpha amylase, catalytic domain
AZO93171.1	maltodextrin transmembrane transporter activity
AZO93172.1	methyl-accepting chemotaxis protein
AZO93173.1	Binding-protein-dependent transport system inner membrane component
AZO93174.1	Bacterial extracellular solute-binding protein
AZO93175.1	Transposase
AZO93223.1	Glycosyl hydrolases family 31
AZO93224.1	PFAM Binding-protein-dependent transport system inner membrane component
AZO93226.1	helix_turn _helix lactose operon repressor
AZO93260.1	Catalyzes the ATP-dependent transfer of a sulfur to tRNA to produce 4-thiouridine in position 8 of tRNAs, which functions as a near-UV photosensor. Also catalyzes the transfer of sulfur to the sulfur carrier protein ThiS, forming ThiS-thiocarboxylate. This is a step in the synthesis of thiazole, in the thiamine biosynthesis pathway. The sulfur is donated as persulfide by IscS
AZO93265.1	Cupin domain
AZO93268.1	CheD chemotactic sensory transduction
AZO93269.1	Methyltransferase, chemotaxis proteins
AZO93271.1	Signal transducing histidine kinase, homodimeric domain
AZO93276.1	Catalyzes the reduction of ribonucleotides to deoxyribonucleotides. May function to provide a pool of deoxyribonucleotide precursors for DNA repair during oxygen limitation and or for immediate growth after restoration of oxygen
AZO93277.1	PFAM MgtC SapB transporter
AZO93288.1	short-chain
AZO93289.1	Branched-chain amino acid transport system / permease component
AZO93290.1	Part of the ABC transporter complex RbsABC involved in ribose import. Responsible for energy coupling to the transport system
AZO93326.1	Putative nucleotide-binding of sugar-metabolising enzyme
AZO93327.1	COG1593 TRAP-type C4-dicarboxylate transport system large permease component
AZO93329.1	TRAP-type C4-dicarboxylate transport system periplasmic component
AZO93330.1	Pfam:Kce
AZO93331.1	FCD
AZO93332.1	racemase activity, acting on amino acids and derivatives
AZO93334.1	PFAM DUF218 domain
AZO93346.1	converts alpha-aldose to the beta-anomer
AZO93348.1	Transposase
AZO93360.1	mannitol 2-dehydrogenase activity
AZO93362.1	carbohydrate transport
AZO93363.1	Catalyzes the condensation of (S)-aspartate-beta- semialdehyde (S)-ASA and pyruvate to 4-hydroxy- tetrahydrodipicolinate (HTPA)
AZO93410.1	Phosphoglucomutase phosphomannomutase alpha beta alpha domain I
AZO93413.1	alkaline phosphatase synthesis transcriptional regulatory protein PhoP
AZO93414.1	PFAM Bacterial extracellular solute-binding protein
AZO93415.1	phosphatase activity
AZO93416.1	Binding-protein-dependent transport system inner membrane component
AZO93417.1	Bacterial extracellular solute-binding protein
AZO93418.1	Part of the ABC transporter complex PstSACB involved in phosphate import. Responsible for energy coupling to the transport system
AZO93429.1	Alcohol dehydrogenase GroES-like domain
AZO93430.1	Psort location CytoplasmicMembrane, score
AZO93431.1	Tripartite ATP-independent periplasmic transporters, DctQ component
AZO93432.1	COG COG1638 TRAP-type C4-dicarboxylate transport system, periplasmic component
AZO93468.1	Protein of unknown function DUF86
AZO93469.1	Nucleotidyltransferase domain
AZO93470.1	Cytidylyltransferase-like
AZO93471.1	asparagine synthase
AZO93472.1	Glycosyl glycerophosphate transferases involved in teichoic acid biosynthesis TagF TagB EpsJ RodC
AZO93474.1	Catalyzes the reduction of dTDP-6-deoxy-L-lyxo-4- hexulose to yield dTDP-L-rhamnose
AZO93475.1	Belongs to the NAD(P)-dependent epimerase dehydratase family. dTDP-glucose dehydratase subfamily
AZO93476.1	Catalyzes the epimerization of the C3' and C5'positions of dTDP-6-deoxy-D-xylo-4-hexulose, forming dTDP-6-deoxy-L-lyxo-4- hexulose
AZO93477.1	Catalyzes the formation of dTDP-glucose, from dTTP and glucose 1-phosphate, as well as its pyrophosphorolysis
AZO93479.1	Glycosyltransferase WbsX
AZO93480.1	Glycosyl transferases group 1
AZO93481.1	Glycosyltransferase like family 2
AZO93482.1	Protein conserved in bacteria
AZO93483.1	NAD(P)H-binding
AZO93487.1	PFAM D-galactarate dehydratase Altronate hydrolase
AZO93488.1	PFAM SAF domain
AZO93490.1	BtpA family
AZO93491.1	Catalyzes the reversible phosphorylytic cleavage of uridine and deoxyuridine to uracil and ribose- or deoxyribose-1- phosphate. The produced molecules are then utilized as carbon and energy sources or in the rescue of pyrimidine bases for nucleotide synthesis
AZO93492.1	pfkB family carbohydrate kinase
AZO93493.1	Isochorismatase family
AZO93494.1	Belongs to the binding-protein-dependent transport system permease family
AZO93495.1	Belongs to the binding-protein-dependent transport system permease family
AZO93496.1	ABC transporter
AZO93497.1	basic membrane
AZO93498.1	PFAM Bacterial regulatory proteins, gntR family
AZO93503.1	General (non sugar-specific) component of the phosphoenolpyruvate-dependent sugar phosphotransferase system (sugar PTS). This major carbohydrate active-transport system catalyzes the phosphorylation of incoming sugar substrates concomitantly with their translocation across the cell membrane. Enzyme I transfers the phosphoryl group from phosphoenolpyruvate (PEP) to the phosphoryl carrier protein (…
AZO93504.1	PTS system, glucose subfamily, IIA
AZO93505.1	Psort location Cytoplasmic, score
AZO93507.1	transcriptional antiterminator
AZO93508.1	Transposase
AZO93653.1	DeoC/LacD family aldolase
AZO93654.1	PFAM Bacterial extracellular solute-binding protein, family 7
AZO93656.1	mannitol 2-dehydrogenase activity
AZO93657.1	Catalyzes the phosphorylation of 5-dehydro-2-deoxy-D- gluconate (2-deoxy-5-keto-D-gluconate or DKG) to 6-phospho-5- dehydro-2-deoxy-D-gluconate (DKGP)
AZO93658.1	Periplasmic binding protein LacI transcriptional regulator
AZO93664.1	PFAM Integrase catalytic region
AZO93745.1	Psort location Cytoplasmic, score
AZO93746.1	Converts N-acetylmannosamine-6-phosphate (ManNAc-6-P) to N-acetylglucosamine-6-phosphate (GlcNAc-6-P)
AZO93747.1	phosphotransferase system, EIIB
AZO93758.1	Histidine kinase
AZO93759.1	response regulator receiver
AZO93760.1	Glycosyltransferase group 2 family protein
AZO93788.1	Domain of unknown function (DUF2088)
AZO93866.1	purine nucleotide biosynthetic process
AZO93867.1	Catalyzes the phosphorylation of ribose at O-5 in a reaction requiring ATP and magnesium. The resulting D-ribose-5- phosphate can then be used either for sythesis of nucleotides, histidine, and tryptophan, or as a component of the pentose phosphate pathway
AZO93868.1	Catalyzes the interconversion of beta-pyran and beta- furan forms of D-ribose
AZO93869.1	Part of an ABC transporter complex involved in carbohydrate import. Could be involved in ribose, galactose and or methyl galactoside import. Responsible for energy coupling to the transport system
AZO93870.1	Belongs to the binding-protein-dependent transport system permease family
AZO93871.1	Periplasmic substrate-binding component of the ATP-dependent ribose transport system
AZO93890.1	PFAM Integrase catalytic region
AZO93906.1	Haloacid dehalogenase-like hydrolase
AZO93912.1	Belongs to the binding-protein-dependent transport system permease family
AZO93913.1	PFAM periplasmic binding protein LacI transcriptional regulator
AZO93914.1	PFAM regulatory protein DeoR
AZO93915.1	ABC transporter
AZO93918.1	Tripartite tricarboxylate transporter family receptor
AZO93920.1	Tripartite tricarboxylate transporter TctA family
AZO93926.1	Lipopolysaccharide kinase (Kdo/WaaP) family
AZO93927.1	O-Antigen ligase
AZO93928.1	PFAM Lipopolysaccharide kinase (Kdo WaaP) family
AZO93929.1	PFAM Glycosyl transferases group 1
AZO93930.1	transferase activity, transferring glycosyl groups
AZO93931.1	PFAM Glycosyl transferases group 1
AZO93991.1	Nucleotidyltransferase domain
AZO93992.1	HEPN domain
AZO94010.1	Belongs to the DegT DnrJ EryC1 family
AZO94012.1	Glycosyl glycerophosphate transferases involved in teichoic acid biosynthesis TagF TagB EpsJ RodC
AZO94013.1	Cytidylyltransferase
AZO94014.1	Methyltransferase domain
AZO94015.1	SAF
AZO94016.1	Bacterial transferase hexapeptide (six repeats)
AZO94018.1	Male sterility protein
AZO94019.1	PFAM UDP-glucose GDP-mannose dehydrogenase family, NAD binding domain
AZO94020.1	DegT/DnrJ/EryC1/StrS aminotransferase family
AZO94021.1	hypothetical protein D7D81_05125
AZO94022.1	Bacterial transferase hexapeptide
AZO94023.1	Type IV pilus biogenesis stability protein PilW
AZO94024.1	PFAM Glycosyl transferase family 2
AZO94025.1	ATP-grasp domain
AZO94026.1	glycolate biosynthetic process
AZO94027.1	synthase
AZO94028.1	Cytidylyltransferase
AZO94029.1	pseudaminic acid biosynthesis-associated protein PseG
AZO94105.1	PTS system, Lactose/Cellobiose specific IIB subunit
AZO94106.1	The phosphoenolpyruvate-dependent sugar phosphotransferase system (PTS), a major carbohydrate active - transport system, catalyzes the phosphorylation of incoming sugar substrates concomitant with their translocation across the cell membrane
AZO94107.1	PTS system, Lactose/Cellobiose specific IIA subunit
AZO94108.1	Permeases of the drug metabolite transporter (DMT)
AZO94109.1	Mga helix-turn-helix domain
AZO94110.1	General (non sugar-specific) component of the phosphoenolpyruvate-dependent sugar phosphotransferase system (sugar PTS). This major carbohydrate active-transport system catalyzes the phosphorylation of incoming sugar substrates concomitantly with their translocation across the cell membrane. Enzyme I transfers the phosphoryl group from phosphoenolpyruvate (PEP) to the phosphoryl carrier protein (…
AZO94111.1	phosphoenolpyruvate-dependent sugar phosphotransferase system
AZO94119.1	C-terminal binding-module, SLH-like, of glucodextranase
AZO94162.1	PFAM Coat F domain
AZO94172.1	PFAM Integrase catalytic region
AZO94207.1	Putative heavy-metal chelation
AZO94210.1	Psort location CytoplasmicMembrane, score
AZO94211.1	Hydrogenase accessory protein HypB
AZO94212.1	Oxidoreductase
AZO94213.1	Hydrogenase/urease nickel incorporation, metallochaperone, hypA
AZO94266.1	Belongs to the resistance-nodulation-cell division (RND) (TC 2.A.6) family
AZO94278.1	Bacterial extracellular solute-binding protein
AZO94279.1	Binding-protein-dependent transport system inner membrane component
AZO94281.1	pfkB family carbohydrate kinase
AZO94283.1	Fructose-bisphosphate aldolase class-II
AZO94338.1	PFAM Extracellular solute-binding protein, family 3
AZO94339.1	TIGRFAM amine acid ABC transporter, permease protein, 3-TM region, His Glu Gln Arg opine family
AZO94340.1	abc transporter atp-binding protein
AZO94362.1	COG3316 Transposase and inactivated derivatives
AZO94374.1	Carbon starvation protein CstA
AZO94375.1	hypothetical protein D7D81_07045
AZO94376.1	Anion-transporting ATPase
AZO94377.1	hypothetical protein D7D81_07055
AZO94402.1	Mga helix-turn-helix domain
AZO94403.1	PTS system, Lactose/Cellobiose specific IIB subunit
AZO94404.1	Belongs to the carbohydrate kinase PfkB family. LacC subfamily
AZO94405.1	PFAM Alcohol dehydrogenase zinc-binding domain protein
AZO94406.1	phosphoenolpyruvate-dependent sugar phosphotransferase system
AZO94407.1	General (non sugar-specific) component of the phosphoenolpyruvate-dependent sugar phosphotransferase system (sugar PTS). This major carbohydrate active-transport system catalyzes the phosphorylation of incoming sugar substrates concomitantly with their translocation across the cell membrane. Enzyme I transfers the phosphoryl group from phosphoenolpyruvate (PEP) to the phosphoryl carrier protein (…
AZO94424.1	carbohydrate transport
AZO94425.1	Trap-type c4-dicarboxylate transport system, small permease component
AZO94426.1	mannitol 2-dehydrogenase activity
AZO94431.1	COG3316 Transposase and inactivated derivatives
AZO94462.1	PFAM Sodium Bile acid symporter family
AZO94478.1	Nucleotidyltransferase domain
AZO94479.1	HEPN domain
AZO94490.1	Transposase
AZO94492.1	Beta-lactamase
AZO94494.1	Isoprenylcysteine carboxyl methyltransferase (ICMT) family
AZO94497.1	monooxygenase activity
AZO94499.1	Catalyzes the formation of the isocyclic ring in chlorophyll biosynthesis. Mediates the cyclase reaction, which results in the formation of divinylprotochlorophyllide (Pchlide) characteristic of all chlorophylls from magnesium-protoporphyrin IX 13-monomethyl ester (MgPMME)
AZO94500.1	PFAM Cys Met metabolism
AZO94501.1	PFAM Cys Met metabolism
AZO94502.1	Receptor family ligand binding region
AZO94507.1	Bacterial extracellular solute-binding protein
AZO94508.1	Psort location CytoplasmicMembrane, score 10.00
AZO94509.1	Binding-protein-dependent transport system inner membrane component
AZO94510.1	COG COG0191 Fructose tagatose bisphosphate aldolase
AZO94511.1	DeoR C terminal sensor domain
AZO94512.1	ADP-specific Phosphofructokinase/Glucokinase conserved region
AZO94513.1	Helix-turn-helix domain, rpiR family
AZO94514.1	D-lyxose ketol-isomerase
AZO94518.1	NADH flavin oxidoreductase NADH oxidase
AZO94519.1	Transcriptional regulator, PadR-like family
AZO94520.1	Major Facilitator
AZO94546.1	PFAM RNA-metabolising metallo-beta-lactamase
AZO94548.1	Type I restriction modification DNA specificity domain
AZO94549.1	Subunit R is required for both nuclease and ATPase activities, but not for modification
AZO94550.1	AAA domain
AZO94551.1	ASCH
AZO94552.1	ASCH
AZO94565.1	Belongs to the BI1 family
AZO94592.1	helix_turn_helix, arabinose operon control protein
AZO94593.1	Mandelate racemase / muconate lactonizing enzyme, C-terminal domain
AZO94594.1	Protein of unknown function (DUF421)
AZO94596.1	Protein of unknown function (DUF1657)
AZO94598.1	COG0412 Dienelactone hydrolase and related enzymes
AZO94599.1	PFAM Membrane protein of
AZO94601.1	Protein of unknown function (DUF421)
AZO94602.1	Acetyltransferase (Isoleucine patch superfamily)
AZO94603.1	TipAS antibiotic-recognition domain
AZO94610.1	Psort location Cytoplasmic, score
AZO94616.1	hypothetical protein D7D81_08435
AZO94620.1	methyltransferase activity
AZO94621.1	PFAM alkyl hydroperoxide reductase Thiol specific antioxidant Mal allergen
AZO94633.1	Belongs to the SfsA family
AZO94634.1	PFAM LysM domain
AZO94640.1	Iron-sulfur cluster binding domain of dihydroorotate dehydrogenase B
AZO94641.1	TIGRFAM glutamate synthase (NADPH), homotetrameric
AZO94654.1	Uncharacterised protein family (UPF0014)
AZO94655.1	PFAM ABC transporter
AZO94672.1	PFAM Dinitrogenase iron-molybdenum cofactor
AZO94683.1	ANTAR
AZO94684.1	Part of the ABC transporter complex RbsABC involved in ribose import. Responsible for energy coupling to the transport system
AZO94685.1	Branched-chain amino acid transport system / permease component
AZO94686.1	Alcohol dehydrogenase GroES-like domain
AZO94688.1	Class II Aldolase and Adducin N-terminal domain
AZO94689.1	Periplasmic binding protein domain
AZO94690.1	Part of the ABC transporter complex MglABC involved in galactose methyl galactoside import. Responsible for energy coupling to the transport system
AZO94691.1	Branched-chain amino acid transport system / permease component
AZO94692.1	COG1028 Dehydrogenases with different specificities (related to short-chain alcohol dehydrogenases)
AZO94694.1	Histidine kinase
AZO94695.1	cheY-homologous receiver domain
AZO94700.1	Sensory domain found in PocR
AZO94717.1	DegT/DnrJ/EryC1/StrS aminotransferase family
AZO94718.1	Belongs to the sulfur carrier protein TusA family
AZO94719.1	Synthesizes selenophosphate from selenide and ATP
AZO94720.1	Protein of unknown function (DUF3343)
AZO94721.1	Converts seryl-tRNA(Sec) to selenocysteinyl-tRNA(Sec) required for selenoprotein biosynthesis
AZO94722.1	PFAM 2-hydroxyglutaryl-CoA dehydratase D-component
AZO94723.1	TIGRFAM C_GCAxxG_C_C family protein
AZO94724.1	COGs COG1275 Tellurite resistance protein and related permease
AZO94725.1	Psort location Cytoplasmic, score
AZO94726.1	PBP superfamily domain
AZO94727.1	probably responsible for the translocation of the substrate across the membrane
AZO94728.1	Binding-protein-dependent transport system inner membrane component
AZO94729.1	BadF/BadG/BcrA/BcrD ATPase family
AZO94730.1	Soluble P-type ATPase
AZO94731.1	Translation elongation factor
AZO94732.1	PFAM Bacterial regulatory helix-turn-helix protein, lysR family
AZO94733.1	In the first step of glycine, betaine and sarcosine reductases, the substrate is bound to component PB via a Schiff base intermediate. Then the PB-activated substrate is nucleophilically attacked by the selenol anion of component PA to transform it to a carboxymethylated selenoether and the respective amine. By action of component PC, acetyl phosphate is formed, leaving component PA in its oxidiz…
AZO94734.1	a
AZO94735.1	TIGRFAM selenoprotein B, glycine betaine sarcosine D-proline reductase family
AZO94736.1	BCCT, betaine/carnitine/choline family transporter
AZO94737.1	PFAM Bacterial regulatory proteins, tetR family
AZO94738.1	PFAM FAD-dependent pyridine nucleotide-disulphide oxidoreductase
AZO94739.1	Belongs to the thioredoxin family
AZO94740.1	PFAM 3-Oxoacyl- acyl-carrier-protein (ACP) synthase III
AZO94741.1	PFAM Fatty acid synthesis protein
AZO94746.1	COG3316 Transposase and inactivated derivatives
AZO94756.1	triosephosphate isomerase
AZO94757.1	secondary thiamine-phosphate synthase enzyme
AZO94758.1	PTS system, Lactose/Cellobiose specific IIB subunit
AZO94759.1	system Galactitol-specific IIC component
AZO94760.1	hypothetical protein D7D81_09235
AZO94761.1	L-ribulose-5-phosphate 4-epimerase
AZO94762.1	bh protein
AZO94766.1	Phosphoenolpyruvate-dependent sugar phosphotransferase system, EIIA 2
AZO94767.1	PTS system, Lactose/Cellobiose specific IIB subunit
AZO94768.1	PTS system sugar-specific permease component
AZO94769.1	Transketolase, thiamine diphosphate binding domain
AZO94770.1	Mga helix-turn-helix domain
AZO94773.1	Transposase IS200 like
AZO94775.1	Domain of unknown function (DUF1835)
AZO94776.1	Polysaccharide biosynthesis C-terminal domain
AZO94777.1	transcriptional regulator, MerR family
AZO94778.1	B3/4 domain
AZO94803.1	Glycosyl hydrolases family 2
AZO94804.1	alpha-galactosidase
AZO94805.1	Catalyzes the reversible epimerization of cellobiose to 4-O-beta-D-glucopyranosyl-D-mannose (Glc-Man)
AZO94823.1	Methyltransferase domain
AZO94824.1	PFAM Glycosyl transferase family 2
AZO94825.1	COG0463 Glycosyltransferases involved in cell wall biogenesis
AZO94826.1	Sulfotransferase family
AZO94835.1	protein containing a NRPS condensation (Elongation) domain
AZO94864.1	N-6 DNA Methylase
AZO94874.1	D-isomer specific 2-hydroxyacid dehydrogenase catalytic region
AZO94891.1	Family membership
AZO94896.1	dipeptidase activity
AZO94899.1	hypothetical protein D7D81_10020
AZO94902.1	Uncharacterised protein family (UPF0175)
AZO94905.1	Acetyltransferase (GNAT) domain
AZO94906.1	PIN domain
AZO94907.1	hypothetical protein D7D81_10060
AZO94908.1	HAD-hyrolase-like
AZO94920.1	Nucleotidyltransferase domain
AZO94921.1	HEPN domain
AZO94923.1	Uncharacterised protein family (UPF0175)
AZO94932.1	N-formylglutamate amidohydrolase
AZO94939.1	coenzyme F420-1:gamma-L-glutamate ligase activity
AZO94942.1	LUD domain
AZO94943.1	Transposase
AZO94945.1	PFAM DNA methylase
AZO94946.1	Type III restriction enzyme, res subunit
AZO94951.1	SIR2-like domain
AZO94952.1	FRG domain
AZO94953.1	Protein of unknown function DUF262
AZO95067.1	metallopeptidase activity
AZO95112.1	Phage integrase, N-terminal SAM-like domain
AZO95115.1	Transposase
AZO95117.1	PFAM Integrase catalytic region
AZO95119.1	In eubacteria ppGpp (guanosine 3'-diphosphate 5-' diphosphate) is a mediator of the stringent response that coordinates a variety of cellular activities in response to changes in nutritional abundance
AZO95120.1	N-terminal domain of reverse transcriptase
AZO95121.1	DJ-1/PfpI family
AZO95122.1	D,D-heptose 1,7-bisphosphate phosphatase
AZO95124.1	Nucleotidyltransferase
AZO95125.1	Metallo-beta-lactamase superfamily
AZO95141.1	PFAM S-layer domain-containing protein
AZO95145.1	Transposase
AZO95170.1	Belongs to the V-ATPase 116 kDa subunit family
AZO95202.1	Sodium:dicarboxylate symporter family
AZO95237.1	Psort location Cytoplasmic, score
AZO95238.1	hypothetical protein D7D81_11925
AZO95239.1	IrrE N-terminal-like domain
AZO95240.1	Helix-turn-helix XRE-family like proteins
AZO95241.1	Cro/C1-type HTH DNA-binding domain
AZO95247.1	ERF superfamily
AZO95248.1	Bacteriophage replication protein O
AZO95255.1	Putative HNHc nuclease
AZO95259.1	VRR-NUC domain
AZO95267.1	Phage terminase, large subunit
AZO95269.1	phage portal protein
AZO95270.1	Protein of unknown function (DUF3307)
AZO95271.1	Phage minor capsid protein 2
AZO95272.1	hypothetical protein D7D81_12095
AZO95275.1	hypothetical protein D7D81_12110
AZO95279.1	hypothetical protein D7D81_12130
AZO95284.1	TIGRFAM phage tail tape measure protein, TP901 family
AZO95287.1	hypothetical protein D7D81_12170
AZO95289.1	cell adhesion involved in biofilm formation
AZO95291.1	Ami_3
AZO95295.1	type II secretion system protein K
AZO95298.1	TIGRFAM sporulation integral membrane protein YlbJ
AZO95302.1	Periplasmic binding protein LacI transcriptional regulator
AZO95304.1	Periplasmic binding protein LacI transcriptional regulator
AZO95305.1	response regulator receiver
AZO95306.1	histidine kinase, HAMP
AZO95310.1	Domain of unknown function (DUF4386)
AZO95312.1	Predicted permease
AZO95376.1	Major facilitator superfamily
AZO95379.1	Flavodoxin domain
AZO95408.1	Transposase
AZO95429.1	Ketopantoate reductase PanE/ApbA
AZO95430.1	PFAM response regulator receiver
AZO95431.1	PFAM response regulator receiver
AZO95432.1	histidine kinase HAMP region domain protein
AZO95450.1	Belongs to the class I-like SAM-binding methyltransferase superfamily. rRNA adenine N(6)-methyltransferase family
AZO95451.1	hypothetical protein D7D81_13080
AZO95452.1	glycerophosphoryl diester phosphodiesterase
AZO95468.1	COG3316 Transposase and inactivated derivatives
AZO95544.1	Transposase
AZO95573.1	COG3316 Transposase and inactivated derivatives
AZO95691.1	Pfam:N_methyl_2
AZO95726.1	Catalyzes the attachment of threonine to tRNA(Thr) in a two-step reaction L-threonine is first activated by ATP to form Thr-AMP and then transferred to the acceptor end of tRNA(Thr)
AZO95739.1	hypothetical protein D7D81_14730
AZO95744.1	Reverse transcriptase (RNA-dependent DNA polymerase)
AZO95745.1	Bacterial transcription activator, effector binding domain
AZO95746.1	Reverse transcriptase
AZO95747.1	PFAM Integrase catalytic region
AZO95749.1	NADPH-dependent FMN reductase
AZO95750.1	Phage integrase, N-terminal SAM-like domain
AZO95754.1	PFAM Integrase catalytic region
AZO95803.1	Rhs element vgr protein
AZO95807.1	Catalyzes the oxidative decarboxylation of 6- phosphogluconate to ribulose 5-phosphate and CO(2), with concomitant reduction of NADP to NADPH
AZO95815.1	RbsD / FucU transport protein family
AZO95829.1	TIGRFAM degV family protein
AZO95864.1	Two component transcriptional regulator, winged helix family
AZO95865.1	Histidine kinase
AZO95870.1	response regulator, receiver
AZO95875.1	Belongs to the membrane fusion protein (MFP) (TC 8.A.1) family
AZO95878.1	Bacterial regulatory proteins, tetR family
AZO95902.1	Xylose isomerase-like TIM barrel
AZO95925.1	Alpha-2-macroglobulin MG1 domain
AZO95926.1	COGs COG0310 ABC-type Co2 transport system permease component
AZO95939.1	ABC 3 transport family
AZO95940.1	ABC 3 transport family
AZO95941.1	ATPases associated with a variety of cellular activities
AZO95942.1	iron dependent repressor
AZO95947.1	COGs COG0619 ABC-type cobalt transport system permease component CbiQ and related transporter
AZO95948.1	Alpha-2-macroglobulin MG1 domain
AZO95949.1	COGs COG0310 ABC-type Co2 transport system permease component
AZO95950.1	ATPase, P-type (transporting), HAD superfamily, subfamily IC
AZO95951.1	Peptidase dimerisation domain
AZO95952.1	Metal-sensitive transcriptional repressor
AZO95964.1	COG3316 Transposase and inactivated derivatives
AZO95971.1	TIGRFAM TonB family protein
AZO95974.1	Putative, 10TM heavy-metal exporter
AZO95975.1	PFAM Integrase catalytic region
AZO95976.1	NADPH-dependent FMN reductase
AZO95977.1	helix_turn_helix, arabinose operon control protein
AZO95978.1	ATPases associated with a variety of cellular activities
AZO95979.1	ATPases associated with a variety of cellular activities
AZO95996.1	iron ion homeostasis
AZO95997.1	FecCD transport family
AZO95999.1	ATPases associated with a variety of cellular activities
AZO96000.1	abc-type fe3 -hydroxamate transport system, periplasmic component
AZO96001.1	ABC transporter
AZO96002.1	binding-protein-dependent transport systems inner membrane component
AZO96003.1	binding-protein-dependent transport systems inner membrane component
AZO96006.1	Abc transporter
AZO96007.1	Transposase
AZO96008.1	Ni2 -binding GTPase involved in regulation of expression and maturation of urease and
AZO96039.1	PFAM Domain related to MnhB subunit of Na H antiporter
AZO96040.1	Domain of unknown function (DUF4040)
AZO96051.1	Bacterial extracellular solute-binding protein
AZO96082.1	cellulase activity
AZO96083.1	NlpC/P60 family
AZO96084.1	Phage minor tail protein L
AZO96092.1	Phage portal protein, SPP1 Gp6-like
AZO96095.1	XRE family transcriptional regulator
AZO96096.1	sequence-specific DNA binding
AZO96119.1	Peptidoglycan-binding domain 1 protein
AZO96121.1	hypothetical protein D7D81_16830
AZO96122.1	cellulase activity
AZO96123.1	NlpC/P60 family
AZO96124.1	Phage minor tail protein L
AZO96125.1	hypothetical protein D7D81_16855
AZO96131.1	BRO family, N-terminal domain
AZO96133.1	transcriptional
AZO96139.1	P22 coat protein-protein 5 domain protein
AZO96141.1	hypothetical protein D7D81_16945
AZO96143.1	Phage portal protein, SPP1 Gp6-like
AZO96144.1	Phage terminase large subunit
AZO96145.1	Terminase, small subunit
AZO96149.1	regulation of transcription, DNA-dependent
AZO96153.1	TIGRFAM deoxycytidine triphosphate deaminase
AZO96154.1	hypothetical protein D7D81_17010
AZO96156.1	COG NOG28949 non supervised orthologous group
AZO96157.1	Endodeoxyribonuclease RusA
AZO96158.1	hypothetical protein D7D81_17030
AZO96163.1	Single-stranded DNA-binding protein
AZO96169.1	it exhibits DNA-dependent ATPase activity and contains distinct active sites for ATP binding, DNA binding, and interaction with DnaC protein, primase, and other prepriming proteins
AZO96171.1	dnaD_dom DnaD domain protein
AZO96174.1	Rad52/22 family double-strand break repair protein
AZO96185.1	phage infection protein
AZO96186.1	Phage antirepressor protein
AZO96187.1	Helix-turn-helix
AZO96188.1	Helix-turn-helix XRE-family like proteins
AZO96189.1	Belongs to the 'phage' integrase family
AZO96191.1	Transposase
AZO96242.1	PFAM regulatory protein LysR
AZO96243.1	NADH flavin oxidoreductase NADH oxidase
AZO96267.1	response regulator
AZO96268.1	Catalyzes the phosphorylation of ribose at O-5 in a reaction requiring ATP and magnesium. The resulting D-ribose-5- phosphate can then be used either for sythesis of nucleotides, histidine, and tryptophan, or as a component of the pentose phosphate pathway
AZO96269.1	Inosine-uridine preferring nucleoside hydrolase
AZO96272.1	Belongs to the binding-protein-dependent transport system permease family
AZO96273.1	import. Responsible for energy coupling to the transport system
AZO96310.1	Small, acid-soluble spore proteins, alpha/beta type
AZO96312.1	C-methyltransferase C-terminal domain
AZO96313.1	NAD dependent epimerase dehydratase family
AZO96314.1	Catalyzes the epimerization of the C3' and C5'positions of dTDP-6-deoxy-D-xylo-4-hexulose, forming dTDP-6-deoxy-L-lyxo-4- hexulose
AZO96315.1	Putative zinc binding domain
AZO96316.1	Polysaccharide biosynthesis protein
AZO96317.1	Nucleotidyl transferase
AZO96322.1	Bacterial transferase hexapeptide (six repeats)
AZO96333.1	Radical SAM
AZO96364.1	COG3316 Transposase and inactivated derivatives
AZO96372.1	Psort location Cytoplasmic, score
AZO96373.1	Psort location Cytoplasmic, score
AZO96374.1	PFAM fumarate reductase succinate dehydrogenase flavoprotein
AZO96375.1	mannitol 2-dehydrogenase activity
AZO96378.1	Belongs to the enoyl-CoA hydratase isomerase family
AZO96379.1	Coenzyme A transferase
AZO96380.1	Transcriptional regulator IclR
AZO96384.1	PFAM response regulator receiver
AZO96385.1	nitronate monooxygenase activity
AZO96387.1	Domain of unknown function DUF83
AZO96388.1	CRISPR (clustered regularly interspaced short palindromic repeat), is an adaptive immune system that provides protection against mobile genetic elements (viruses, transposable elements and conjugative plasmids). CRISPR clusters contain sequences complementary to antecedent mobile elements and target invading nucleic acids. CRISPR clusters are transcribed and processed into CRISPR RNA (crRNA). Fun…
AZO96389.1	CRISPR (clustered regularly interspaced short palindromic repeat), is an adaptive immune system that provides protection against mobile genetic elements (viruses, transposable elements and conjugative plasmids). CRISPR clusters contain spacers, sequences complementary to antecedent mobile elements, and target invading nucleic acids. CRISPR clusters are transcribed and processed into CRISPR RNA (c…
AZO96390.1	DEAD-like helicases superfamily
AZO96391.1	CRISPR-associated protein (Cas_Cas5)
AZO96392.1	CRISPR-associated protein Cas7
AZO96393.1	CRISPR-associated protein TM1802 (cas_TM1802)
AZO96394.1	Protein of unknown function (DUF3800)
AZO96396.1	Protein of unknown function DUF86
AZO96397.1	nucleotidyltransferase activity
AZO96398.1	Metallo-beta-lactamase superfamily
AZO96399.1	hmm pf00753
AZO96402.1	PFAM Binding-protein-dependent transport system inner membrane component
AZO96403.1	PFAM Bacterial extracellular solute-binding protein
AZO96412.1	Putative restriction endonuclease
AZO96413.1	Putative restriction endonuclease
AZO96417.1	His Kinase A (phosphoacceptor) domain
AZO96418.1	Transcriptional regulatory protein, C terminal
AZO96425.1	Cache domain
AZO96428.1	TfoX C-terminal domain
AZO96457.1	Methyl-accepting chemotaxis-like domains (chemotaxis sensory transducer).
AZO96466.1	Sugar ABC transporter permease
AZO96467.1	Binding-protein-dependent transport system inner membrane component
AZO96468.1	Bacterial extracellular solute-binding protein
AZO96469.1	Bacterial regulatory proteins, lacI family
AZO96489.1	Transaldolase/Fructose-6-phosphate aldolase
AZO96554.1	PFAM Integrase catalytic region
AZO96584.1	Transketolase, pyrimidine binding domain
AZO96585.1	PFAM Transketolase, thiamine diphosphate binding domain
AZO96586.1	Tripartite ATP-independent periplasmic transporter, DctM component
AZO96588.1	Bacterial extracellular solute-binding protein, family 7
AZO96589.1	Enoyl-(Acyl carrier protein) reductase
AZO96591.1	Gluconate
AZO96594.1	Binding-protein-dependent transport system inner membrane component
AZO96597.1	PFAM Binding-protein-dependent transport system inner membrane component
AZO96599.1	ABC-type sugar transport system periplasmic component
AZO96604.1	Binding-protein-dependent transport system inner membrane component
AZO96607.1	PFAM Short-chain dehydrogenase reductase SDR
AZO96610.1	Hexapeptide repeat of succinyl-transferase
AZO96611.1	PFAM Pyridoxal phosphate biosynthetic protein PdxA
AZO96612.1	TIGRFAM Phosphotransferase System HPr (HPr) Family
AZO96623.1	TIGRFAM 2-oxoacid acceptor oxidoreductase, beta subunit, pyruvate 2-ketoisovalerate family
AZO96627.1	Belongs to the BI1 family
AZO96637.1	Catalyzes a reversible aldol reaction between acetaldehyde and D-glyceraldehyde 3-phosphate to generate 2-deoxy- D-ribose 5-phosphate
AZO96638.1	ABC transporter, transmembrane region
AZO96641.1	Part of the ABC transporter complex RbsABC involved in ribose import. Responsible for energy coupling to the transport system
AZO96642.1	Belongs to the binding-protein-dependent transport system permease family
AZO96652.1	Oxidoreductase family, C-terminal alpha/beta domain
AZO96653.1	Belongs to the DegT DnrJ EryC1 family
AZO96657.1	Belongs to the glycosyl hydrolase 1 family
AZO96666.1	Binding-protein-dependent transport system inner membrane component
AZO96670.1	PTS system mannitol-specific
AZO96676.1	Transport permease protein
AZO96680.1	site-specific DNA-methyltransferase (adenine-specific) activity
AZO96683.1	Belongs to the BI1 family
AZO96684.1	PFAM integrase
AZO96686.1	YmaF family
AZO96687.1	Periplasmic binding protein domain
AZO96688.1	Periplasmic binding protein domain
AZO96690.1	Part of the ABC transporter complex PstSACB involved in phosphate import. Responsible for energy coupling to the transport system
AZO96692.1	Fructose-bisphosphate aldolase class-II
AZO96693.1	Transketolase
AZO96694.1	Cysteine-rich KTR
AZO96715.1	Response regulator, receiver
AZO96725.1	Catalyzes the conversion of 1-hydroxy-2-methyl-2-(E)- butenyl 4-diphosphate (HMBPP) into a mixture of isopentenyl diphosphate (IPP) and dimethylallyl diphosphate (DMAPP). Acts in the terminal step of the DOXP MEP pathway for isoprenoid precursor biosynthesis
AZO96735.1	PFAM TrkA-N domain
AZO96738.1	EamA-like transporter family
AZO96757.1	Phage antirepressor protein
AZO96777.1	Flagellin is the subunit protein which polymerizes to form the filaments of bacterial flagella
AZO96784.1	Belongs to the bacterial solute-binding protein 9 family
AZO96785.1	hydrophobe amphiphile efflux-3 (HAE3) family
AZO96786.1	TonB dependent receptor
AZO96793.1	Binding-protein-dependent transport system inner membrane component
AZO96796.1	Phage Tail Collar Domain
AZO96799.1	Phage Tail Collar Domain
AZO96801.1	COG3617 Prophage antirepressor
AZO96802.1	N-4 methylation of cytosine
AZO96804.1	Iron-containing alcohol dehydrogenase
AZO96820.1	Sugar ABC transporter permease
AZO96821.1	PFAM binding-protein-dependent transport systems inner membrane component
AZO96823.1	Histidine kinase
AZO96824.1	PFAM Binding-protein-dependent transport system inner membrane component
AZO96827.1	Phenazine biosynthesis-like protein
