# Supplementary material for: Genomics and cellulolytic, hemicellulolytic, and amylolytic potential of Iocasia fonsfrigidae strain SP3-1 for polysaccharide degradation
Source: PeerJ. 2022 Oct 19;10:e14211. doi: 10.7717/peerj.14211 (PMC9587714; doi:10.7717/peerj.14211)
Supplement: Supplemental Information 10 [file peerj-10-14211-s010.xlsx]

## Sheet: Degradation PASC
The degradation of strain SP3-1 compared with DSM7362
Strain	(g) PASC before inoculated			Average	(g) PASC remained after cultured 7days			Average	(%) PASC Remained after cultured 7days			Aveage	Standard Deviation
Control	0.025	0.025	0.025	0.025	0.025	0.025	0.025	0.025	100	100	100	100	0
SP3-1	0.025	0.025	0.025	0.025	0.0117	0.0118	0.0114	0.0116333	46.8	47.2	45.6	46.5333	0.832666
DSM7362	0.025	0.025	0.025	0.025	0.0188	0.0196	0.0184	0.0189333	75.2	78.4	73.6	75.7333	2.44404
***Note: 0.5% = 0.025g
