# Supplementary material for: Genomics and cellulolytic, hemicellulolytic, and amylolytic potential of Iocasia fonsfrigidae strain SP3-1 for polysaccharide degradation
Source: PeerJ. 2022 Oct 19;10:e14211. doi: 10.7717/peerj.14211 (PMC9587714; doi:10.7717/peerj.14211)
Supplement: Supplemental Information 11 [file peerj-10-14211-s011.xlsx]

## Sheet: SP3-1_Enzyme Activities
			Raw Data of Enzymatic activities of the crude enzyme from I. fonsfrigidae strain SP3-1
Substrate types (SP3-1)	Activity OD (540nm) (T=15min)			Average OD	SD	Blank OD (T=0 min)			Average OD	SD	Activity (U/ml)	Protein concentration (g/mL)	Specific Activity (U/g protein)	SD
Phosphoric acid swollen cellulose (PASC)	0.577	0.549	0.571	0.565667	0.0147422	0.256	0.281	0.298	0.278333	0.0211266	1.46704	0.25	5.86817	0.0284977
Starch	0.329	0.367	0.364	0.353333	0.0211266	0.218	0.228	0.21	0.218667	0.0090185	1.17935	0.25	4.71739	0.0195818
Birchwood	0.559	0.561	0.655	0.591667	0.0548574	0.418	0.42	0.395	0.411	0.0138924	1.10754	0.25	4.43014	0.0413211
